# Supplementary material for: Gli incunaboli della Biblioteca Statale Isontina di Gorizia. Catalogo
Source: Royal Society of Chemistry journal article supplement (doi:10.1039/c2ib20053h), 2008-01-01

| GEL ID PROTEIN                                                    | Gene ID  | MW | pI  | MASCOT |       |         |            | ALDENTE     |      |       |         |            |             |
|-------------------------------------------------------------------|----------|----|-----|--------|-------|---------|------------|-------------|------|-------|---------|------------|-------------|
|                                                                   |          |    |     | RANK   | SCORE | PEPTIDE | COVERAGE % | MASS VALUES | RANK | SCORE | PEPTIDE | COVERAGE % | MASS VALUES |
| 1 Endoplasmic reticulum chaperone protein                         | Hsp90b1  | 90 | 4.7 | 1      | 54    | 30      | 38         | 200         | 18   | 4     | 14      | 19         | 200         |
| 2 Heat shock protein HSP 90-alpha                                 | Hsp90aa1 | 85 | 4.9 | 10     | 36    | 20      | 35         | 200         | 5    | 2     | 11      | 20         | 200         |
| 4 Calreticulin                                                    | Calr     | 46 | 4.3 | 12     | 31    | 10      | 31         | 150         | 1    | 2     | 6       | 25         | 150         |
| 5 Rab GTPase-binding effector protein 2                           | Rabep2   | 62 | 4.9 | 4      | 51    | 14      | 19         | 100         | 4    | 4     | 8       | 14         | 100         |
| 6 Protein disulfide-isomerase                                     | P4hb     | 55 | 4.8 | 1*     | 87    | 21      | 48         | 150         | 1*   | 15    | 9       | 22         | 70          |
| 8 ATP synthase subunit beta, mitochondrial                        | Atp5b    | 52 | 5   | 1*     | 64    | 17      | 35         | 100         | 1*   | 24    | 12      | 29         | 100         |
| 9 SPARC                                                           | Sparc    | 33 | 4.7 | 1*     | 66    | 13      | 41         | 100         | 1*   | 12    | 9       | 28         | 100         |
| 10 Annexin A5                                                     | Anxa5    | 36 | 4.8 | 1*     | 63    | 13      | 43         | 100         | 1*   | 16    | 11      | 31         | 100         |
| 14 ATP synthase subunit d, mitochondrial                          | Atp5h    | 19 | 5.5 | 4      | 41    | 8       | 67         | 150         | 1    | 2     | 6       | 43         | 200         |
| 15 26S proteasome non-ATPase regulatory subunit 10                | Psmd10   | 25 | 5.7 | 1      | 46    | 10      | 53         | 200         | 5    | 1.2   | 6       | 39         | 200         |
| 16 N-acetyltransferase 9                                          | Nat9     | 28 | 5.2 | 3      | 38    | 11      | 41         | 200         | 5    | 2     | 6       | 32         | 200         |
| 17 Prohibitin                                                     | Phb      | 30 | 5.5 | 12     | 35    | 7       | 37         | 100         | 1    | 5     | 5       | 29         | 100         |
| 18 TIP41-like protein                                             | Tipr1    | 31 | 5.4 | 15     | 31    | 7       | 32         | 100         | 1    | 5     | 6       | 32         | 100         |
| 19 Nuclear distribution protein nudE homolog 1                    | Nde1     | 36 | 5.3 | 8      | 31    | 12      | 40         | 200         | 3    | 7     | 10      | 29         | 200         |
| 20 Annexin A4                                                     | Anxa4    | 36 | 5.4 | 2      | 37    | 9       | 34         | 75          | 1*   | 14    | 11      | 38         | 150         |
| 25 T-complex protein 1 subunit theta                              | Cct8     | 59 | 5.4 | 7      | 38    | 11      | 27         | 100         | 1    | 6     | 11      | 29         | 100         |
| 28 T-complex protein 1 subunit theta                              | Cct8     | 59 | 5.4 | 13     | 34    | 10      | 18         | 100         | 4    | 2     | 6       | 15         | 100         |
| 29 T-complex protein 1 subunit theta                              | Cct8     | 59 | 5.4 | 6      | 38    | 10      | 19         | 75          | 2    | 10    | 12      | 22         | 100         |
| 30 RuvB-like 2                                                    | Ruvb12   | 51 | 5.5 | 10     | 36    | 16      | 40         | 200         | 5    | 3     | 8       | 21         | 200         |
| 32 Tubulin alpha-1C chain                                         | Tuba1c   | 50 | 5   | 1*     | 62    | 11      | 32         | 80          | 1    | 12    | 8       | 24         | 80          |
| 33 Na(+)/H(+) exchange regulatory cofactor NHE-RF3                | Pdzk1    | 56 | 5.3 | 15     | 35    | 14      | 38         | 200         | 8    | 2     | 9       | 25         | 200         |
| 35 ATP synthase subunit beta, mitochondrial                       | Atp5b    | 52 | 5   | 24     | 31    | 11      | 33         | 150         | 1    | 8     | 9       | 29         | 150         |
| 36 Actin, cytoplasmic 2                                           | Actg1    | 42 | 5.3 | 2      | 52    | 11      | 35         | 100         | 3    | 4     | 6       | 24         | 100         |
| 37 Actin, cytoplasmic 2                                           | Actg1    | 42 | 5.3 | 1*     | 64    | 13      | 45         | 100         | 2    | 7     | 8       | 33         | 100         |
| 38 Actin, cytoplasmic 2                                           | Actg1    | 42 | 5.3 | 12     | 36    | 15      | 46         | 250         | 1    | 5     | 12      | 39         | 250         |
| 43 Protein disulfide-isomerase A3                                 | Pdia3    | 54 | 5.7 | 1      | 45    | 12      | 29         | 100         | 5    | 7     | 9       | 21         | 100         |
| 40 Homer protein homolog 1                                        | Homer1   | 41 | 5.4 | 16     | 26    | 11      | 31         | 200         | 6    | 2     | 7       | 21         | 200         |
| 41 Activator of 90 kDa heat shock protein ATPase homolog 1        | Ahsa1    | 38 | 5.4 | 10     | 39    | 12      | 37         | 150         | 5    | 4     | 8       | 26         | 150         |
| 42 Guanine nucleotide-binding protein subunit alpha-11            | Gna11    | 42 | 5.7 | 39     | 26    | 8       | 30         | 100         | 12   | 2     | 7       | 29         | 200         |
| 44 Baculoviral IAP repeat-containing protein 4                    | Xiap     | 56 | 5.7 | 15     | 36    | 16      | 32         | 200         | 1    | 8     | 14      | 27         | 200         |
| 45 Protein disulfide-isomerase A3                                 | Pdia3    | 54 | 5.7 | 1*     | 65    | 14      | 26         | 60          | 1*   | 20    | 9       | 19         | 60          |
| 47 Annexin A6                                                     | Anxa6    | 76 | 5.3 | 41     | 29    | 23      | 30         | 200         | 1    | 5     | 12      | 22         | 200         |
| 48 RNA polymerase I-specific transcription initiation factor RRN3 | Rrn3     | 75 | 5.3 | 1      | 46    | 10      | 21         | 70          | 2    | 5     | 7       | 17         | 70          |
| 49 Collagen type IV alpha-3-binding protein                       | Col4a3bp | 71 | 5.3 | 2      | 44    | 8       | 20         | 50          | 5    | 3     | 5       | 15         | 50          |
| 50 Calpain-9                                                      | Capn9    | 79 | 5.1 | 45     | 26    | 13      | 26         | 200         | 14   | 2     | 9       | 18         | 200         |
| 51 Heat shock cognate 71 kDa protein                              | Hspa8    | 71 | 5.4 | 1*     | 78    | 13      | 26         | 50          | 1*   | 28    | 10      | 22         | 50          |
| 52 Cytochrome P450 2D11                                           | Cyp2d11  | 57 | 6.2 | 2      | 36    | 16      | 43         | 250         | 35   | 1.4   | 7       | 21         | 250         |
| 53 Pyruvate kinase isozymes M1/M2                                 | Pkm2     | 58 | 6.7 | 14     | 33    | 15      | 38         | 200         | 1    | 7     | 14      | 31         | 200         |
| 54 5-azacytidine-induced protein 2                                | Azi2     | 46 | 6.2 | 29     | 30    | 8       | 24         | 120         | 1    | 4     | 9       | 25         | 120         |
| 56 Ornithine aminotransferase, mitochondrial                      | Oat      | 46 | 5.7 | 15     | 29    | 8       | 20         | 75          | 4    | 7     | 6       | 16         | 75          |
| 57 Transcobalamin-2                                               | Tcn2     | 46 | 5.9 | 1*     | 57    | 11      | 36         | 80          | 1    | 4     | 6       | 15         | 100         |
| 58 WNT1-inducible-signaling pathway protein 1                     | Wispr1   | 43 | 6   | 21     | 29    | 6       | 23         | 70          | 30   | 3     | 7       | 33         | 150         |
| 60 Alpha-enolase                                                  | Eno1     | 47 | 6.4 | 1*     | 61    | 13      | 38         | 75          | 1*   | 19    | 11      | 32         | 100         |
| 62 Cytosolic 5'-nucleotidase 3                                    | Nt5c3    | 37 | 6.2 | 5      | 45    | 11      | 46         | 150         | 4    | 4     | 7       | 34         | 150         |
| 63 Ankyrin repeat domain-containing protein 16                    | Ankrd16  | 40 | 6.5 | 26     | 30    | 8       | 28         | 100         | 2    | 6     | 6       | 27         | 100         |
| Control Serum albumin                                             |          | 66 | 5.6 | 1*     | 129   | 19      | 32         | 50          | 1*   | 32    | 12      | 24         | 50          |

(\* indicates p<0.05)

(\* indicates p<0.05)

## 1 Endoplasmin

Number of mass values searched: **200**

Number of mass values matched: **30**

Sequence Coverage: **38%**

Matched peptides shown in **Bold Red**

1 MRVLWVLGLC CVLLTFGFVR ADDEVVDVGT VEEDLGKSRE GSRTDDEVVQ  
51 REEEAIQLDG LNASQIR ELR EKSEKFAFQA EVNRMMKLII NSLYKNKEIF  
101 LRELISNASD ALDKIRLISL TDENALAGNE ELTVKIKCDK EKNLLHVTDT  
151 GVGMTREELV KNLGTIAKSG TSEFLNK MTE AQEDGQSTSE LIGQFVGVGFY  
201 SAFLVADKVI VTSKHNDTQ HIWESDSNEF SVIADPRGNT LGRGTTITLV  
251 LKEEASDYLE LDTIKNLVRK YSQFINFPIY VWSSKTETVE EPLEEDEAAK  
301 EEKEESDDEA AVEEEEEEEK PKTKKVEKTV WDWELMNDIK PIWQRPSKEV  
351 EEDEYKAFYK SFSKESDDPM AYIHFTAEGE VTFK SILFVP TSAPRGLFDE  
401 YGSKKSDYIK LYVRRVITD DFHDMMPKYL NFVKGVVSD DLPLNVSRET  
451 LQQHKLLKVI RKKLVKRLTD MIKKIADEKY NDTFWKEFGT NIKLGVIEDH  
501 SNRTRLAKLL RFQSSHSTD ITSLDQYVER MKEKQDKIYF MAGSSRKEAE  
551 SSPFVERLLK KGYEVIYLTE PVDEYCIQAL PEFDGKRFQN VAKEGVKFDE  
601 SEKTKESREA TEKEFEPLLN WMKDKALKDK IEKAVVSQRL TESPICALVAS  
651 QYGWSGNMER IMKAQAYQTG KDISTNYAS QKKTFEINPR HPLIRDMLRR  
701 IKEDEDDKTV MDLAVVLFET ATRSGYLLP DTKAYGDR IE RMLRSLNID  
751 PEAQVEEPE EEPEDTSEDA EDSEQDEGEE MDAGTEEEEE ETEKESTEKD  
801 EL

| Start - End | Observed  | Mr(expt)  | Mr(calc)  | Delta   | Miss | Sequence                       |
|-------------|-----------|-----------|-----------|---------|------|--------------------------------|
| 44 - 67     | 2728.5059 | 2727.4986 | 2727.3311 | 0.1675  | 1    | R.TDDEVVQREEEAIQLDGLNASQIR.E   |
| 76 - 84     | 1081.4958 | 1080.4885 | 1080.5352 | -0.0467 | 0    | K.FAFQAEVNR.M                  |
| 115 - 135   | 2299.1104 | 2298.1031 | 2298.2430 | -0.1399 | 1    | K.IRLISLTDENALAGNEELTVK.I      |
| 117 - 135   | 2029.9357 | 2028.9284 | 2029.0579 | -0.1295 | 0    | R.LISLTDENALAGNEELTVK.I        |
| 143 - 156   | 1529.7711 | 1528.7638 | 1528.7668 | -0.0030 | 0    | K.NLLHVTDGVMTR.E Oxidation (M) |
| 169 - 177   | 982.5743  | 981.5670  | 981.4767  | 0.0903  | 0    | K.SGTSEFLNK.M                  |
| 244 - 252   | 945.5840  | 944.5767  | 944.5906  | -0.0139 | 0    | R.GTTITLVLK.E                  |
| 253 - 265   | 1525.7590 | 1524.7517 | 1524.7195 | 0.0322  | 0    | K.EEASDYLELDTIK.N              |
| 253 - 269   | 2007.8750 | 2006.8677 | 2007.0160 | -0.1483 | 1    | K.EEASDYLELDTIKNLVR.K          |
| 271 - 285   | 1878.8118 | 1877.8045 | 1877.9352 | -0.1307 | 0    | K.YSQFINFPIYVWSSK.T            |
| 286 - 303   | 2075.8767 | 2074.8694 | 2074.9429 | -0.0735 | 1    | K.TETVEEPEEDEAAKEEK.E          |
| 385 - 395   | 1187.5620 | 1186.5547 | 1186.6710 | -0.1163 | 0    | K.SILFVPTSAPR.G                |
| 396 - 404   | 1015.4853 | 1014.4780 | 1014.4658 | 0.0122  | 0    | R.GLFDEYGSK.K                  |

|           |           |           |           |         |   |                                          |
|-----------|-----------|-----------|-----------|---------|---|------------------------------------------|
| 435 - 448 | 1485.7764 | 1484.7691 | 1484.7471 | 0.0220  | 0 | K.GVVSDDDLPLNVSR.E                       |
| 480 - 486 | 973.5068  | 972.4995  | 972.4341  | 0.0654  | 0 | K.YNDTFWK.E                              |
| 494 - 503 | 1139.4948 | 1138.4875 | 1138.5731 | -0.0856 | 0 | K.LGVIEDHSNR.T                           |
| 512 - 530 | 2249.9668 | 2248.9595 | 2249.0349 | -0.0754 | 0 | R.FQSSHSTDITSLDQYVER.M                   |
| 512 - 532 | 2525.1978 | 2524.1905 | 2524.1653 | 0.0253  | 1 | R.FQSSHSTDITSLDQYVERMK.E Oxidation (M)   |
| 538 - 546 | 1031.5186 | 1030.5113 | 1030.4906 | 0.0207  | 0 | K.IYFMAGSSR.K                            |
| 548 - 557 | 1150.5045 | 1149.4972 | 1149.5302 | -0.0330 | 0 | K.EAESSPFVER.L                           |
| 548 - 560 | 1504.8314 | 1503.8241 | 1503.7933 | 0.0308  | 1 | K.EAESSPFVERLLK.K                        |
| 606 - 613 | 949.5800  | 948.5727  | 948.4512  | 0.1215  | 1 | K.ESREATEK.E                             |
| 614 - 623 | 1306.4618 | 1305.4545 | 1305.6427 | -0.1882 | 0 | K.EFEPLLNMWK.D                           |
| 614 - 625 | 1549.8325 | 1548.8252 | 1548.7646 | 0.0606  | 1 | K.EFEPLLNMWKDK.A                         |
| 614 - 625 | 1565.7687 | 1564.7614 | 1564.7595 | 0.0019  | 1 | K.EFEPLLNMWKDK.A Oxidation (M)           |
| 631 - 639 | 1029.5012 | 1028.4939 | 1028.5978 | -0.1039 | 1 | K.IEKAVVSQR.L                            |
| 640 - 660 | 2356.0581 | 2355.0508 | 2355.0623 | -0.0115 | 0 | R.LTESPCALVASQYGWGSGNMER.I               |
| 640 - 660 | 2372.0566 | 2371.0493 | 2371.0573 | -0.0079 | 0 | R.LTESPCALVASQYGWGSGNMER.I Oxidation (M) |
| 672 - 682 | 1289.4431 | 1288.4358 | 1288.5935 | -0.1577 | 0 | K.DISTNYYASQK.K                          |
| 725 - 738 | 1555.8196 | 1554.8123 | 1554.7678 | 0.0445  | 1 | R.SGYLLPDTKAYGDR.I                       |

No match to: 905.5583, 909.0853, 915.0988, 922.5927, 929.5406, 931.5886, 938.2546, 951.5974, 957.5889, 964.5785, 971.5471, 985.5544, 996.6267, 1000.5451, 1002.5645, 1028.1122, 1034.1201, 1044.0867, 1045.5483, 1052.0842, 1058.5181, 1066.0469, 1072.0638, 1074.4966, 1087.8682, 1089.4968, 1096.4908, 1102.4717, 1106.4812, 1112.4718, 1118.4954, 1125.4600, 1132.4618, 1142.4961, 1160.4723, 1165.5022, 1174.4811, 1179.4865, 1194.4810, 1200.4828, 1210.5118, 1215.4619, 1218.4274, 1228.4943, 1233.4595, 1242.5195, 1254.9510, 1260.9579, 1271.4943, 1277.5182, 1296.4666, 1302.4686, 1313.4448, 1320.4288, 1329.4117, 1339.5291, 1349.4414, 1353.5052, 1365.4369, 1373.4202, 1383.4709, 1398.5509, 1410.6362, 1431.7175, 1436.7743, 1443.6770, 1458.7432, 1465.7992, 1469.8359, 1475.7861, 1489.8849, 1496.7712, 1507.8514, 1514.7791, 1521.7626, 1531.8372, 1545.7941, 1571.7803, 1578.8190, 1586.7476, 1593.7516, 1604.8303, 1612.7311, 1620.7410, 1630.7979, 1634.8312, 1638.7882, 1656.7715, 1660.8043, 1668.7233, 1677.8011, 1685.7087, 1699.7349, 1707.6805, 1716.7422, 1724.7655, 1734.7208, 1747.6952, 1750.7113, 1761.7334, 1763.7100, 1766.6901, 1777.7506, 1780.7266, 1788.7314, 1791.6519, 1794.7073, 1802.7483, 1810.7211, 1816.6924, 1824.7252, 1832.7179, 1837.8287, 1851.8021, 1867.7772, 1891.7842, 1908.7151, 1922.7653, 1940.8107, 1950.8356, 1961.8081, 1969.7723, 1983.8173, 1993.8538, 2015.8491, 2043.9508, 2051.9067, 2063.9033, 2082.8931, 2094.9368, 2103.9028, 2112.8738, 2149.9788, 2167.0046, 2193.9902, 2221.0085, 2225.0337, 2234.0007, 2247.9924, 2262.0227, 2265.0066, 2282.1052, 2284.1023, 2297.1304, 2308.0293, 2317.0557, 2321.0505, 2336.0762, 2367.1672, 2383.9456, 2400.0967, 2421.1833, 2433.1626, 2446.1931, 2448.1587, 2457.1394, 2462.2063, 2474.0090, 2482.1855, 2487.1948, 2503.1887, 2511.2419, 2565.2710, 2591.3171, 2609.3235, 2637.3337, 2655.3684, 2705.3545, 2751.5554, 2780.6462

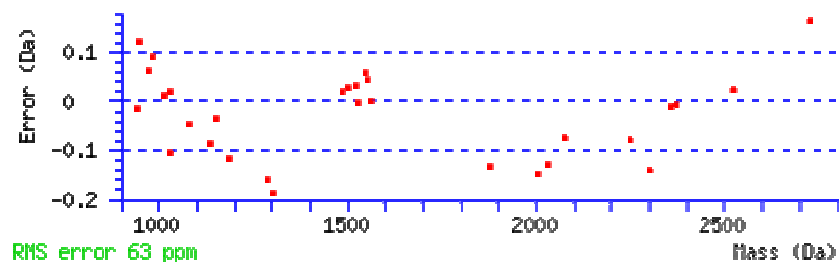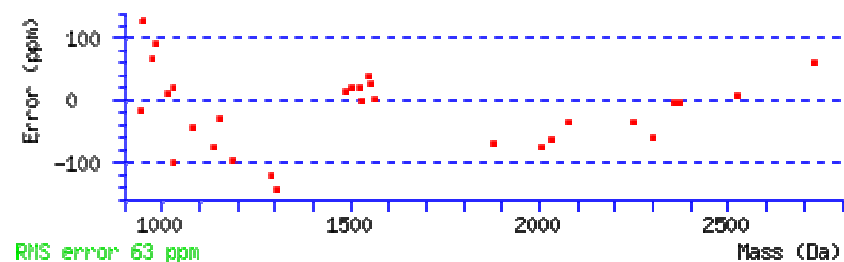

## 2 Heat shock protein HSP 90-alpha

Number of mass values searched: **200**

Number of mass values matched: **20**

Sequence Coverage: **35%**

Matched peptides shown in **Bold Red**

1 MPEETQTQDQ PMEEEEVETF AFQAEIAQLM SLIINTFYNS KEIFLRELIS  
51 NSSDALDKIR YESLTDPSKL DSGK**ELHINL IPSKQDR**TLT IVDTGIGMTK  
101 **ADLINNLGTI AK**SGTKAFME ALQAGADISM IGQFGVGFYS AYLVAEKVTV  
151 ITKHNDDEQY AWESSAGGSF TVRTDTGEPM GRGTV**VILHL KEDQTEYLEE**  
201 **RRIKEIVKHH SQFIGYPITL FVEKERDKEV SDDEAEEK**EE KEEEEKEEEK  
251 **ESDDKPEIED VGSDEEEEEK** KDGDKDKKKK IKEKYIDQEE LNKTKPIWT  
301 **NPDDITNEEY GEFYK**SLTND WEEHLAVKHF SVEGQLEFRA LLFVPRR**APF**  
351 **DLFENR**KKKN NIKLYVRRVF IMDNCEELIP EYLNFI**RGVV DSEDLPLNIS**  
401 **REMLQQSK**IL KVIRKNLVK**K CLELFTELAE DKENYK**KFYE QFSKNIK**LGI**  
451 **HEDSQNR**KKL SELLR**YYTSA SGDEMVS**LKD YCTRM**ENQK HIYFITGETK**  
501 DQVANS**AFVE RLRKHGLEVI YMI**EPIDE**YC VQQLK**EFEGK TLVSVTKEGL  
551 ELPEDEEEK KQEEK**TKFE NLCKIMK**DIL EKKVEKVVVS **NRLVTS****PCCI**  
601 **VTSTY**GW**TAN MERIMKAQAL RDNSTMGYMA AKK**HLEINPD HSIETLRQK  
651 AEADKNDKSV KDLVILLYET ALLSSGF**SLE DPQ**THANRIY RMIK**LGLGID**  
701 EDDPTVDDTS AAVTEEM**PPL EGDD**DTSRME EV**D**

| Start - End | Observed  | Mr(expt)  | Mr(calc)  | Delta   | Miss | Sequence                                                |
|-------------|-----------|-----------|-----------|---------|------|---------------------------------------------------------|
| 75 - 87     | 1562.8802 | 1561.8729 | 1561.8576 | 0.0153  | 1    | <b>K.ELHINLIPSKQDR.T</b>                                |
| 101 - 112   | 1242.5383 | 1241.5310 | 1241.6979 | -0.1669 | 0    | <b>K.ADLINNLGTIAK.S</b>                                 |
| 186 - 201   | 2014.9066 | 2013.8993 | 2014.0371 | -0.1378 | 1    | <b>K.VILHLKEDQTEYLEER.R</b>                             |
| 210 - 226   | 2063.9800 | 2062.9727 | 2063.0840 | -0.1113 | 1    | <b>K.HSQFIGYPITLFVEKER.D</b>                            |
| 229 - 238   | 1150.5803 | 1149.5730 | 1149.4673 | 0.1057  | 0    | <b>K.EVSDDEAEEK.E</b>                                   |
| 251 - 270   | 2308.0857 | 2307.0784 | 2306.9397 | 0.1387  | 0    | <b>K.ESDDKPEIEDVGSDEEEEEK.K</b>                         |
| 301 - 315   | 1833.6860 | 1832.6787 | 1832.7741 | -0.0953 | 0    | <b>R.NPDDITNEEYGEFYK.S</b>                              |
| 348 - 356   | 1108.4401 | 1107.4328 | 1107.5349 | -0.1021 | 0    | <b>R.APFDLFENR.K</b>                                    |
| 388 - 408   | 2358.0645 | 2357.0572 | 2357.1897 | -0.1324 | 1    | <b>R.GVVSDLPLNISREMLQQSK.I</b>                          |
| 420 - 432   | 1595.7428 | 1594.7355 | 1594.7912 | -0.0557 | 1    | <b>K.KCLELFTELAEDK.E</b>                                |
| 421 - 436   | 2001.8607 | 2000.8534 | 2000.9401 | -0.0866 | 1    | <b>K.CLELFTELAEDKENYK.K</b>                             |
| 445 - 457   | 1523.7910 | 1522.7837 | 1522.7852 | -0.0014 | 1    | <b>K.NIKLGIHEDSQNR.K</b>                                |
| 466 - 479   | 1566.8386 | 1565.8313 | 1565.6919 | 0.1394  | 0    | <b>R.YYTASGDEMVS</b> LK <b>.D</b> Oxidation (M)         |
| 487 - 500   | 1707.7086 | 1706.7013 | 1706.8628 | -0.1614 | 1    | <b>K.ENQKHIYFITGETK.D</b>                               |
| 515 - 535   | 2593.2766 | 2592.2693 | 2592.2604 | 0.0089  | 0    | <b>K.HGLEVIYMI</b> EPIDE <b>YCVQQLK.E</b> Oxidation (M) |

569 - 577 1198.5901 1197.5828 1197.5886 -0.0058 1 K.FENLCKIMK.D Oxidation (M)  
593 - 613 2462.1699 2461.1626 2461.1076 0.0550 0 R.LVTSPCCIVTSTYGWTANMER.I Oxidation (M)  
614 - 621 946.6027 945.5954 945.5429 0.0525 1 R.IMKAQALR.D Oxidation (M)  
617 - 632 1743.8872 1742.8799 1742.8080 0.0720 1 K.AQALRDNSTMGYMAAK.K Oxidation (M)  
622 - 633 1348.4518 1347.4445 1347.5799 -0.1353 1 R.DNSTMGYMAAKK.H 2 Oxidation (M)

No match to: 905.1322, 911.5391, 913.6351, 916.6147, 922.3146, 926.6247, 931.6022, 937.6257, 938.6370, 944.2769, 952.5798, 954.6281, 959.6088, 965.5944, 968.6093, 974.6243, 982.6179, 985.5740, 992.1921, 996.6216, 1002.5772, 1014.1541, 1025.5760, 1028.1254, 1030.1190, 1034.1290, 1045.5608, 1052.0900, 1058.5321, 1066.0558, 1072.0669, 1078.0608, 1082.0175, 1088.5122, 1098.5613, 1102.5226, 1106.4880, 1115.9926, 1118.5068, 1126.5658, 1132.6097, 1142.5297, 1148.5917, 1165.6237, 1173.5479, 1180.5522, 1185.5884, 1189.4896, 1191.5179, 1203.6086, 1218.4485, 1222.6334, 1233.4554, 1244.9908, 1254.9529, 1260.9618, 1269.5767, 1276.9219, 1283.9353, 1292.9001, 1299.9122, 1307.4783, 1319.6143, 1326.5609, 1329.4984, 1334.6248, 1339.5380, 1355.5925, 1362.4708, 1372.5652, 1375.5679, 1383.5094, 1391.6058, 1405.6389, 1411.7155, 1419.7850, 1436.7915, 1448.8839, 1455.8240, 1464.8641, 1475.8011, 1482.8552, 1487.8823, 1489.8978, 1507.8655, 1514.8324, 1528.8334, 1531.8483, 1540.8770, 1547.8287, 1549.8472, 1555.8306, 1571.7968, 1577.8169, 1588.8392, 1593.7883, 1604.8569, 1612.8353, 1618.7588, 1630.8510, 1634.8784, 1643.8306, 1650.8287, 1655.8545, 1660.8257, 1669.8156, 1678.8480, 1686.8853, 1699.9137, 1717.7644, 1722.8396, 1735.7548, 1750.7284, 1762.7433, 1766.6803, 1780.7074, 1790.7363, 1794.7073, 1808.8204, 1818.7179, 1838.7988, 1847.7115, 1861.7329, 1873.8247, 1890.8479, 1910.8903, 1922.8085, 1940.8173, 1961.8336, 1970.8190, 1978.8943, 1983.7762, 1993.8625, 2022.9215, 2045.9213, 2084.8772, 2097.9211, 2107.8452, 2149.9839, 2167.0146, 2184.0059, 2193.9854, 2207.9839, 2225.0330, 2234.0117, 2248.9958, 2254.9795, 2266.0544, 2268.9666, 2271.9531, 2282.0994, 2292.9812, 2297.1130, 2299.0964, 2313.0962, 2322.0869, 2336.0842, 2345.0574, 2388.0774, 2399.0481, 2409.1226, 2421.1846, 2432.1287, 2447.1606, 2458.2083, 2481.1763, 2487.1868, 2503.1936, 2509.1982, 2527.1589, 2536.2502, 2548.1843, 2568.2397, 2584.2493, 2609.3225, 2636.3230, 2652.3452, 2664.3545, 2707.5398, 2779.6150

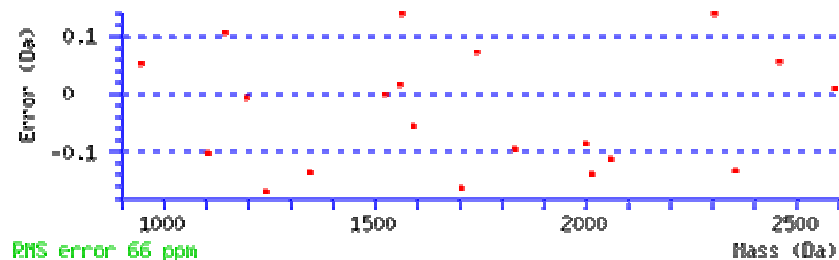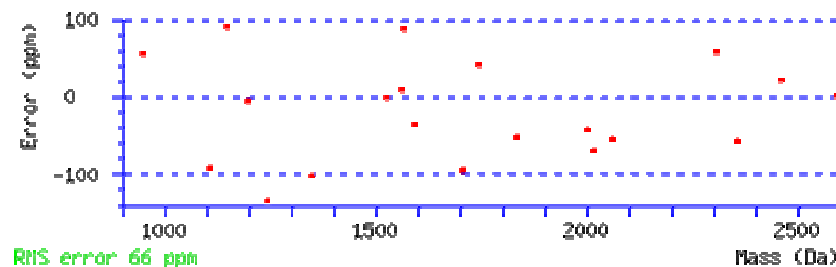

#### 4 Calreticulin

Number of mass values searched: **150**

Number of mass values matched: **10**

Sequence Coverage: **31%**

Matched peptides shown in **Bold Red**

1 MLLSVPLLLG LLGLAADPA IYFK**EQFLDG DAWTNR**WVES KHKSDFGK FV  
51 LSSGKFY GDL EKDKGLQTSQ DARFYALSAK FEPFSNK**GQT LVVQFTV**KHE  
101 QNIDCGGGYV KLFPSGLDQK **DMHGDSEYNI MFGPDICGPG TKKVHVIFNY**  
151 **KGKNVLINKD IRCKDDEFTH** LYTLIVRPDN TYEVK**IDNSQ VESGSLEDDW**  
201 **DFLPPKKIKD PDAAKPEDWD ERAKIDDPD SKPEDWDKPE HIPDPDAK**KP  
251 EDWDEEMDGE WEPPIQNPE YKGEWKPRQI DNPDKGTWI HPEIDNPEYS  
301 PDANIYAYDS FAVLGLDLWQ VKSGTIFDNF LITNDEAYAE EFGNETWGV  
351 KAAEKQMKDK QDEEQRLKEE EEDKKR**KEEE EAEDK**EDDDD RDEDEDEEDE  
401 KEEDEEESPG QAKDEL

| Start - End      | Observed         | Mr(expt)         | Mr(calc)         | Delta          | Miss     | Sequence                                         |
|------------------|------------------|------------------|------------------|----------------|----------|--------------------------------------------------|
| <b>25 - 36</b>   | <b>1451.6514</b> | <b>1450.6441</b> | <b>1450.6477</b> | <b>-0.0036</b> | <b>0</b> | <b>K.EQFLDGDAWTNR.W</b>                          |
| <b>88 - 98</b>   | <b>1219.5522</b> | <b>1218.5449</b> | <b>1218.6972</b> | <b>-0.1523</b> | <b>0</b> | <b>K.GQTLVVQFTV.K.H</b>                          |
| <b>121 - 142</b> | <b>2457.0437</b> | <b>2456.0364</b> | <b>2456.0083</b> | <b>0.0281</b>  | <b>0</b> | <b>K.DMHGDSEYNI MFGPDICGPGTK.K</b> Oxidation (M) |
| <b>143 - 151</b> | <b>1147.5591</b> | <b>1146.5518</b> | <b>1146.6550</b> | <b>-0.1031</b> | <b>1</b> | <b>K.KVHVIFNYK.G</b>                             |
| <b>144 - 151</b> | <b>1019.5690</b> | <b>1018.5617</b> | <b>1018.5600</b> | <b>0.0017</b>  | <b>0</b> | <b>K.VHVIFNYK.G</b>                              |
| <b>154 - 162</b> | <b>1084.4779</b> | <b>1083.4706</b> | <b>1083.6400</b> | <b>-0.1694</b> | <b>1</b> | <b>K.NVLINKDIR.C</b>                             |
| <b>186 - 207</b> | <b>2519.1885</b> | <b>2518.1812</b> | <b>2518.1864</b> | <b>-0.0051</b> | <b>1</b> | <b>K.IDNSQVESGSLEDDWDFLPPKK.I</b>                |
| <b>208 - 222</b> | <b>1784.7324</b> | <b>1783.7251</b> | <b>1783.8377</b> | <b>-0.1125</b> | <b>1</b> | <b>K.IKDPDAAKPEDWDER.A</b>                       |
| <b>225 - 248</b> | <b>2760.4563</b> | <b>2759.4490</b> | <b>2759.2562</b> | <b>0.1928</b>  | <b>0</b> | <b>K.IDDPDTSKPEDWDKPEHIPDPDAK.K</b>              |
| <b>377 - 385</b> | <b>1106.4795</b> | <b>1105.4722</b> | <b>1105.4775</b> | <b>-0.0052</b> | <b>1</b> | <b>R.KEEEEAE DK.E</b>                            |

No match to: 904.5634, 911.5720, 919.5899, 923.6359, 926.6425, 931.5907, 938.6382, 942.6124, 948.6053, 951.5952, 959.5609, 967.5212, 973.5989, 985.5552, 995.5775, 1000.5576, 1002.5673, 1031.5319, 1052.0858, 1058.5194, 1065.9270, 1068.4999, 1074.5187, 1089.5112, 1095.4814, 1102.5139, 1109.4355, 1118.4951, 1130.4995, 1140.4773, 1157.5092, 1165.5222, 1173.4818, 1179.4917, 1186.5319, 1193.4805, 1201.4750, 1227.4708, 1233.4768, 1242.5375, 1265.4633, 1277.5436, 1300.3481, 1307.4832, 1320.3833, 1329.4572, 1339.5253, 1346.4513, 1354.3467, 1365.4271, 1373.4209, 1383.4600, 1390.4880, 1407.5332, 1421.6102, 1427.6881, 1433.6188, 1458.7473, 1466.6816, 1475.7732, 1487.8535, 1489.8757, 1497.7645, 1507.8551, 1514.7355, 1531.8418, 1546.8037, 1549.8403, 1555.8303, 1571.7905, 1578.8268, 1585.7284, 1594.7534, 1604.8096, 1630.7831, 1634.8246, 1646.7344, 1657.7228, 1668.7291, 1675.7971, 1699.7365, 1707.6813, 1716.7585, 1738.7253, 1748.6572, 1765.6331, 1791.6398, 1794.6936, 1816.7086, 1837.8301, 1856.8038, 1890.8287, 1940.8112, 1948.8322, 1963.8606, 1977.8038, 1993.8394, 2015.8312, 2022.7856, 2050.8801, 2063.8894, 2077.8718, 2082.8523, 2094.9075, 2117.8982, 2133.9277, 2170.9121, 2186.9434, 2210.9949, 2225.0146, 2233.9988, 2239.0300, 2248.9817, 2264.0000, 2283.0791, 2298.0959, 2321.0630, 2342.9268, 2367.1980, 2383.9175, 2393.0537, 2400.1406, 2421.1550, 2448.1396, 2473.9968, 2487.1672, 2503.1626, 2510.1428, 2533.1936, 2565.2166, 2637.2976, 2705.2888, 2737.4688, 2747.5715, 2774.4675, 2839.5774, 2856.6282, 2872.6536, 2895.6689, 2902.6985

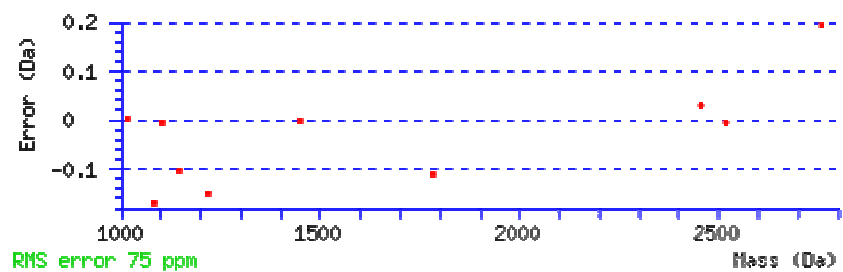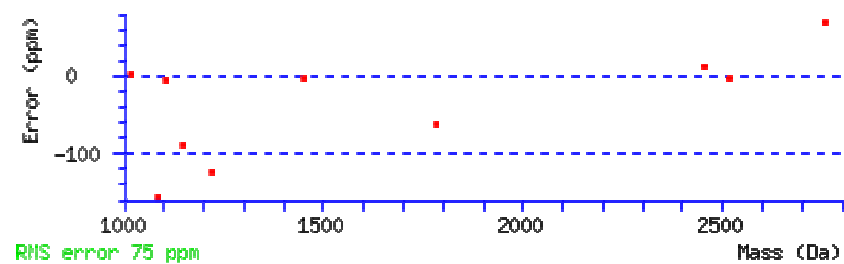

## 6 Protein disulfide-isomerase

Number of mass values searched: **150**

Number of mass values matched: **21**

Sequence Coverage: **48%**

Matched peptides shown in **Bold Red**

1 MLSRALLCLA LAWAARVGAD ALEEDNVLV LKKSNFEEAL AAHKYLLVEF  
51 YAPWCGHCKA LAPEYAKRAA **KLKAEGSEIR LAKVDATEES DLAQQYGVRG**  
101 YPTIKFFKNG DTASPKEYTA **GREADDIVNW LKKRTGPAAT TLSDTAAAES**  
151 LVDSSEVTVI GFFKDVESDS **AKQFLLAEEA IDDIPFGITS NSGVFSKYQL**  
201 **DKDGVVLFKK FDEGRNNFEG EITKEKLLDF IKHNQLPLVI EFTEQTAPK**  
251 FGGEIK**THIL LFLPK**SVSDY DGLSSFKRA AEGFKG**KILF IFIDSDHTDN**  
301 **QRILEFFGLK KEECPAVRLI TLEEEMTKYK PEDELTAEK ITEFCHRFL**  
351 GKIKPHLMSQ EVPEDWDKQP **VKVLVGANFE EVAFDEK**KNV FVEFYAPWCG  
401 HCK**QLAPIWD KLGETYKDHE NIIIAKMDST ANEVEAVKVH SFPTLKFFPA**  
451 **SADRTVIDYN GERTLDGFKK FLESGGQDGA GDEDLLEE ALEPDMEEDD**  
501 DQKAVKDEL

| Start - End | Observed  | Mr(expt)  | Mr(calc)  | Delta   | Miss | Sequence                                   |
|-------------|-----------|-----------|-----------|---------|------|--------------------------------------------|
| 72 - 80     | 1002.5675 | 1001.5602 | 1001.5505 | 0.0097  | 1    | <b>K.LKAEGSEIR.L</b>                       |
| 84 - 99     | 1780.7120 | 1779.7047 | 1779.8275 | -0.1228 | 0    | <b>K.VDATEESDLAQQYGVR.G</b>                |
| 123 - 132   | 1202.4922 | 1201.4849 | 1201.5979 | -0.1130 | 0    | <b>R.EADDIVNWLK.K</b>                      |
| 173 - 197   | 2640.4368 | 2639.4295 | 2639.3483 | 0.0812  | 0    | <b>K.QFLLAEEAIDDIPFGITSNSGVFSK.Y</b>       |
| 198 - 209   | 1424.6982 | 1423.6909 | 1423.7711 | -0.0802 | 1    | <b>K.YQLDKDGVVLFK.K</b>                    |
| 203 - 210   | 905.5485  | 904.5412  | 904.5382  | 0.0030  | 1    | <b>K.DGVVLFKK.F</b>                        |
| 211 - 224   | 1655.7452 | 1654.7379 | 1654.7587 | -0.0208 | 1    | <b>K.FDEGRNNFEGEITK.E</b>                  |
| 233 - 249   | 1964.9060 | 1963.8987 | 1964.0367 | -0.1380 | 0    | <b>K.HNQLPLVIEFTEQTAPK.I</b>               |
| 257 - 265   | 1081.6265 | 1080.6192 | 1080.6695 | -0.0503 | 0    | <b>K.THILLFLPK.S</b>                       |
| 288 - 302   | 1833.7896 | 1832.7823 | 1832.9057 | -0.1234 | 0    | <b>K.ILFIFIDSDHTDNQR.I</b>                 |
| 303 - 310   | 966.6129  | 965.6056  | 965.5586  | 0.0470  | 0    | <b>R.ILEFFGLK.K</b>                        |
| 312 - 328   | 2063.8984 | 2062.8911 | 2062.9915 | -0.1003 | 1    | <b>K.EECPAVRLITLEEEMTK.Y</b> Oxidation (M) |
| 329 - 340   | 1409.5995 | 1408.5922 | 1408.6722 | -0.0799 | 0    | <b>K.YKPESDELTAEK.I</b>                    |
| 341 - 347   | 962.5057  | 961.4984  | 961.4440  | 0.0544  | 0    | <b>K.ITEFCHR.F</b>                         |
| 373 - 387   | 1666.7460 | 1665.7387 | 1665.8250 | -0.0863 | 0    | <b>K.VLVGANFEEVAFDEK.K</b>                 |
| 404 - 417   | 1661.7660 | 1660.7587 | 1660.8824 | -0.1237 | 1    | <b>K.QLAPIWDKLGETYK.D</b>                  |
| 412 - 426   | 1743.7927 | 1742.7854 | 1742.9203 | -0.1348 | 1    | <b>K.LGETYKDHENIIIAK.M</b>                 |
| 427 - 438   | 1293.4622 | 1292.4549 | 1292.5918 | -0.1369 | 0    | <b>K.MDSTANEVEAVK.V</b>                    |
| 439 - 446   | 928.6041  | 927.5968  | 927.5178  | 0.0790  | 0    | <b>K.VHSFPTLK.F</b>                        |



447 - 454 910.5364 909.5291 909.4345 0.0947 0 K.FFPASADR.T  
455 - 463 1066.4899 1065.4826 1065.5091 -0.0265 0 R.TVIDYNGER.T

No match to: 902.3400, 917.3734, 923.5850, 935.5857, 939.5625, 953.5679, 976.5244, 985.5616, 996.6130, 1000.5526, 1016.5523, 1029.5316, 1031.5358, 1034.1272, 1045.5526, 1058.5236, 1068.4943, 1074.5137, 1089.5072, 1102.5100, 1106.4868, 1118.4998, 1125.4934, 1130.5190, 1142.5093, 1151.5708, 1157.5131, 1165.4907, 1173.4908, 1179.4954, 1186.4875, 1191.4742, 1209.5210, 1217.4481, 1233.4583, 1244.4706, 1265.4832, 1277.5366, 1301.4905, 1307.4730, 1320.3965, 1329.4542, 1339.5260, 1354.4640, 1365.4221, 1383.4718, 1391.5096, 1436.7760, 1460.7373, 1465.7969, 1475.7761, 1489.8789, 1496.7589, 1507.8531, 1516.7498, 1531.8398, 1549.8322, 1555.8248, 1564.7863, 1571.7820, 1578.8217, 1593.7650, 1597.7408, 1604.8334, 1621.7086, 1637.7402, 1680.7614, 1694.7700, 1707.6920, 1716.7612, 1732.7819, 1750.7241, 1762.7269, 1764.6514, 1766.6641, 1777.7091, 1791.6478, 1794.7103, 1809.7410, 1817.7563, 1825.7583, 1849.7900, 1860.8376, 1876.8354, 1890.8098, 1912.7305, 1928.7294, 1940.7909, 1948.8385, 1956.7617, 1972.8126, 1978.9080, 1986.8207, 1993.8556, 2013.8026, 2022.8860, 2035.9230, 2050.8845, 2076.8955, 2082.8606, 2094.9043, 2110.8806, 2133.9646, 2149.9578, 2165.9822, 2192.9902, 2225.0264, 2234.0193, 2239.0498, 2265.0581, 2297.1040, 2311.9924, 2342.9485, 2367.1895, 2383.9165, 2399.0632, 2421.1831, 2434.1780, 2447.1670, 2481.1885, 2487.1772, 2509.1912, 2653.4214, 2707.5381, 2717.2700, 2746.5847, 2766.6226, 2779.6399, 2985.8958

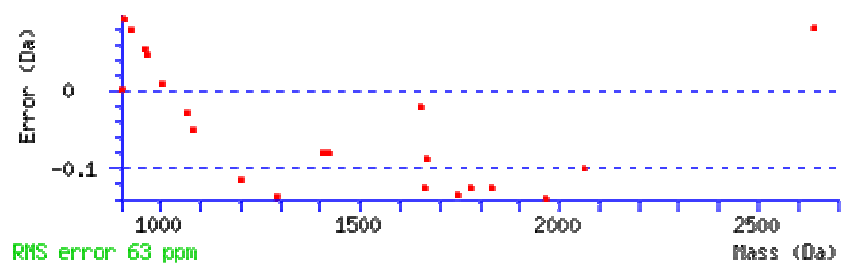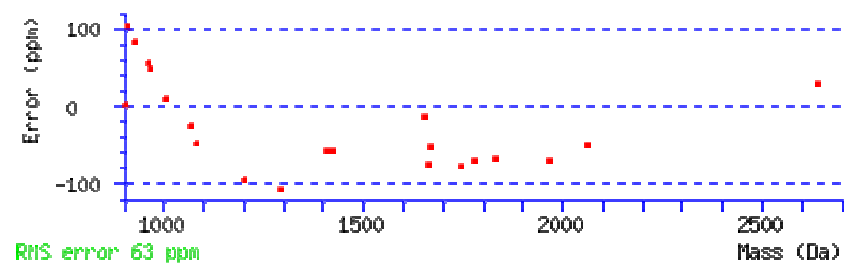

## 8 ATP synthase subunit beta, mitochondrial

Number of mass values searched: **100**

Number of mass values matched: **17**

Sequence Coverage: **35%**

Matched peptides shown in **Bold Red**

1 MLSLVGRVAS ASASGALRGL SPSAALPQAQ LLLRAAPAGV HPARDYAAQA  
51 SAAPKAGTAT GRIVAVIGAV VDVQFDEGLP PILNALEVQG RDSRL**LVLEVA**  
101 **QHLGESTVRT** IAMDGTEGLV RGQK**VLD**SGA **PIKIPVGPET LGR**IMNVIGE  
151 PIDERGIPT KQFAPIHAEA PEFIEMSVEQ EILVTGIK**VV DLLAPYAK**GG  
201 **KIGLFGGAGV GKT**VLIMELI **NNVAKAHGGY SVFAGVGERT** REGNDLYHEM  
251 IESGVINLKD ATSK**VALVYG QMNEPPGARA** RVALTGLTVA EYFRDQEGQD  
301 VLLFIDNIFR **FTQAGSEVSA LLGRIPSAVG YQPTLATDMG TMQER**ITTTK  
351 KGSITSVQAI YVPADDLTDP APATTFAHLD ATTVLSR**AIA ELGIYPAVDP**  
401 **LDSTSRIMDP NIVGNEHYDV ARGVQKILQD** YKSLQDIIAI LGMDELSEED  
451 KLTVSRARKI **QRFLSQPFQV AEVFTGHMGK** LVPLKETIKG FQQILAGEYD  
501 HLPEQAFYMV GPIEEAVAKA DKLAEEHGS

| Start - End | Observed  | Mr(expt)  | Mr(calc)  | Delta   | Miss | Sequence                                         |
|-------------|-----------|-----------|-----------|---------|------|--------------------------------------------------|
| 95 - 109    | 1650.8419 | 1649.8346 | 1649.9101 | -0.0754 | 0    | R.LVLEVA <b>QHLGESTVR</b> .T                     |
| 125 - 143   | 1918.9727 | 1917.9654 | 1918.0888 | -0.1233 | 1    | K.VLD <b>SGAPIKIPVGPETLGR</b> .I                 |
| 189 - 198   | 1088.5510 | 1087.5437 | 1087.6277 | -0.0840 | 0    | K.V <b>VDLLAPYAK</b> .G                          |
| 202 - 212   | 975.5900  | 974.5827  | 974.5549  | 0.0278  | 0    | K.I <b>GLFGGAGV</b> GK.T                         |
| 213 - 225   | 1457.8405 | 1456.8332 | 1456.8323 | 0.0009  | 0    | K.T <b>VLIMELINNVAK</b> .A                       |
| 226 - 239   | 1406.5529 | 1405.5456 | 1405.6739 | -0.1283 | 0    | K.A <b>HGGYSVFAGVGER</b> .T                      |
| 265 - 279   | 1601.7563 | 1600.7490 | 1600.8031 | -0.0541 | 0    | K.V <b>ALVYGMNEPPGAR</b> .A                      |
| 265 - 279   | 1617.7461 | 1616.7388 | 1616.7981 | -0.0592 | 0    | K.V <b>ALVYGMNEPPGAR</b> .A Oxidation (M)        |
| 311 - 324   | 1435.7311 | 1434.7238 | 1434.7467 | -0.0229 | 0    | R.F <b>TQAGSEVSALLGR</b> .I                      |
| 325 - 345   | 2266.0210 | 2265.0137 | 2265.0770 | -0.0632 | 0    | R.I <b>PSAVGYQPTLATDMGMTQER</b> .I               |
| 325 - 345   | 2282.0642 | 2281.0569 | 2281.0719 | -0.0149 | 0    | R.I <b>PSAVGYQPTLATDMGMTQER</b> .I Oxidation (M) |
| 388 - 406   | 1987.9115 | 1986.9042 | 1987.0262 | -0.1220 | 0    | R.A <b>IAELGIYPAVDPLDSTSR</b> .I                 |
| 407 - 422   | 1842.7629 | 1841.7556 | 1841.8730 | -0.1174 | 0    | R.I <b>MDPNIVGNEHYDVAR</b> .G                    |
| 407 - 422   | 1858.7614 | 1857.7541 | 1857.8679 | -0.1138 | 0    | R.I <b>MDPNIVGNEHYDVAR</b> .G Oxidation (M)      |
| 460 - 480   | 2420.2039 | 2419.1966 | 2419.2471 | -0.0505 | 1    | K.I <b>QRFLSQPFQVAEVFTGHMGK</b> .L               |
| 463 - 480   | 2022.9054 | 2021.8981 | 2022.0033 | -0.1052 | 0    | R.F <b>LSQPFQVAEVFTGHMGK</b> .L                  |
| 463 - 480   | 2038.8867 | 2037.8794 | 2037.9983 | -0.1188 | 0    | R.F <b>LSQPFQVAEVFTGHMGK</b> .L Oxidation (M)    |

No match to: 903.3585, 909.1082, 917.3708, 925.3575, 931.5544, 939.3627, 947.5124, 955.5194, 961.3792, 971.5813, 985.5535, 995.5023, 1000.5446, 1002.5604, 1031.5273, 1034.1312, 1045.5488, 1052.0925, 1058.5211, 1066.0615, 1072.0675, 1082.0237, 1097.5128, 1108.4202, 1118.4863, 1127.4496, 1143.5148, 1179.4891, 1212.4800, 1233.4327, 1260.9740, 1276.9426, 1307.4540, 1320.3856, 1329.4556, 1339.4965, 1354.3271, 1362.4515, 1385.4971, 1400.5548, 1415.6436, 1420.6241, 1442.7318, 1449.7668, 1463.7333, 1475.7797, 1489.8760, 1507.8588, 1549.8296, 1555.8330, 1571.7976, 1578.8237, 1595.7512, 1615.7716, 1633.7832, 1638.7843, 1664.8483, 1678.8370, 1707.7136, 1766.6686, 1791.6351, 1794.7191, 1851.8059, 1868.8496, 1932.9861, 1975.9380, 2001.9265, 2009.9244, 2054.8794, 2224.0295, 2233.0156, 2248.9858, 2284.0984, 2299.0330, 2383.9187, 2448.1826, 2487.2205, 2503.2249, 2690.5330, 2705.3325, 2780.6841, 3032.1311, 3046.1436

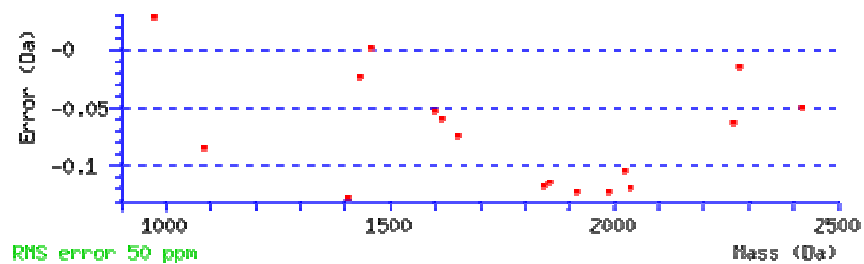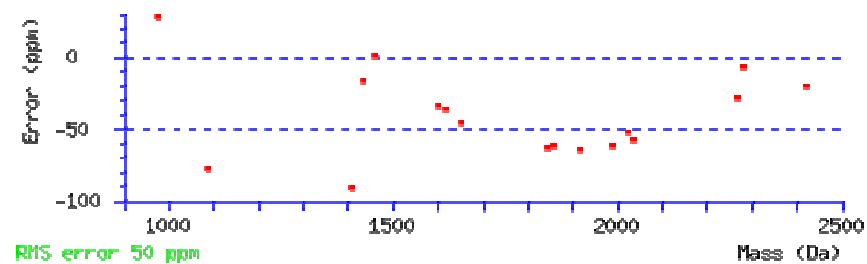

## 10 Annexin A5

Number of mass values searched: **100**

Number of mass values matched: **13**

Sequence Coverage: **43%**

Matched peptides shown in **Bold Red**

1 MATR**GTVD**F **PGFDGR**ADAE VLRKAMK**GLG TDEDSILNLL** T**SR**SNAQR**QE**  
51 **IAQEFK**TLFG RDLVDDLKSE LTGK**FEKLIV** **AMMKPSRLYD** **AYELK**HALKG  
101 AGTDEKVLTE IASRTPEEL SAIKQVYEEE YGSNLEDDVV GDTSGYYQ**RM**  
151 **LVVLLQANRD** PDTAIDDAQV ELDAQALFQA GELKWGTDEE **KFITIFGTRS**  
201 VSHLRRVFDK **YMTISGFQIE** **ETIDRETS**GN **LEQLLAVVK** SIRSIPAYLA  
251 **ETLYYAMK**GGA GTDDHTLIRV VVSR**SEIDLF** **NIRKEFRKNF** **ATSLYS**MIK**G**  
301 DTSGDYK**KAL** LLLCGGEDD

| Start - End | Observed  | Mr(expt)  | Mr(calc)  | Delta   | Miss | Sequence                                           |
|-------------|-----------|-----------|-----------|---------|------|----------------------------------------------------|
| 5 - 16      | 1268.4264 | 1267.4191 | 1267.5834 | -0.1642 | 0    | R.GTVD <b>FPGFDGR</b> .A                           |
| 28 - 43     | 1703.7925 | 1702.7852 | 1702.8737 | -0.0885 | 0    | K.G <b>LGTDEDSILNLL</b> T <b>SR</b> .S             |
| 49 - 56     | 992.5438  | 991.5365  | 991.4974  | 0.0391  | 0    | R.QE <b>IAQEFK</b> .T                              |
| 75 - 87     | 1549.8364 | 1548.8291 | 1548.8520 | -0.0229 | 1    | K.FE <b>KLIV</b> AMMK <b>PSR</b> .L                |
| 88 - 95     | 1014.5341 | 1013.5268 | 1013.5069 | 0.0199  | 0    | R.LY <b>DAYELK</b> .H                              |
| 150 - 159   | 1156.5919 | 1155.5846 | 1155.6798 | -0.0952 | 0    | R.M <b>LVVLLQANR</b> .D                            |
| 192 - 199   | 954.5996  | 953.5923  | 953.5335  | 0.0589  | 0    | K.F <b>ITIFGTR</b> .S                              |
| 211 - 225   | 1802.7581 | 1801.7508 | 1801.8556 | -0.1048 | 0    | K.Y <b>MTISGFQIE</b> ET <b>IDR</b> .E              |
| 226 - 240   | 1613.8595 | 1612.8522 | 1612.9036 | -0.0513 | 0    | R.E <b>TSGNLEQLL</b> AV <b>VK</b> .S               |
| 244 - 258   | 1733.7778 | 1732.7705 | 1732.8745 | -0.1040 | 0    | R.S <b>IPAYLA</b> ET <b>LYAMK</b> .G               |
| 244 - 258   | 1749.7743 | 1748.7670 | 1748.8695 | -0.1024 | 0    | R.S <b>IPAYLA</b> ET <b>LYAMK</b> .G Oxidation (M) |
| 275 - 283   | 1106.5277 | 1105.5204 | 1105.5768 | -0.0563 | 0    | R.S <b>EIDLFNIR</b> .K                             |
| 289 - 299   | 1290.4448 | 1289.4375 | 1289.6326 | -0.1950 | 0    | K.N <b>FATSLYS</b> MIK <b>G</b> Oxidation (M)      |

No match to: 905.5695, 910.6422, 917.3578, 926.6440, 931.5986, 939.6024, 975.5441, 985.5634, 996.6005, 1000.5661, 1002.5697, 1028.5310, 1031.5397, 1034.1202, 1044.0648, 1052.0824, 1058.5245, 1066.0463, 1074.5117, 1082.0104, 1088.5062, 1098.5189, 1118.4994, 1120.5370, 1143.5317, 1165.5929, 1179.5046, 1189.4829, 1224.4697, 1233.4479, 1277.5184, 1307.4675, 1339.5393, 1353.5701, 1383.4703, 1436.7860, 1475.7855, 1489.8878, 1507.8668, 1531.8442, 1555.8230, 1571.7850, 1578.8318, 1595.8381, 1604.8395, 1623.8035, 1638.7972, 1660.7903, 1677.8059, 1717.8010, 1764.6586, 1766.6705, 1780.7144, 1791.6401, 1794.6987, 1817.7498, 1831.7661, 1839.8051, 1851.8075, 1856.8047, 1940.7982, 1993.8673, 2008.9977, 2149.9736, 2192.9724, 2225.0322, 2234.0190, 2248.9851, 2266.0403, 2282.0923, 2284.0940, 2298.1013, 2307.0669, 2342.9619, 2383.9192, 2399.0247, 2420.1772, 2448.1672, 2487.1763, 2503.1833, 2687.4175, 2705.3113, 2780.6472, 2898.5437, 2914.5640, 2929.6018, 2943.6233

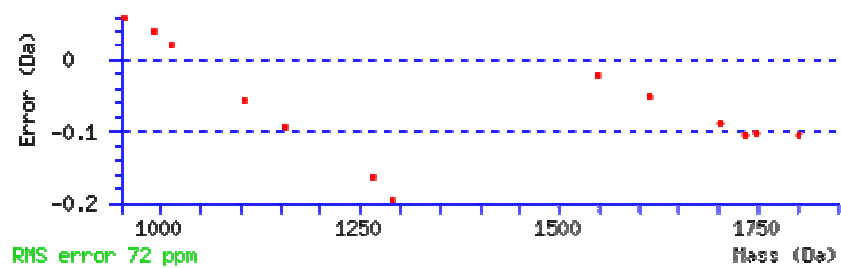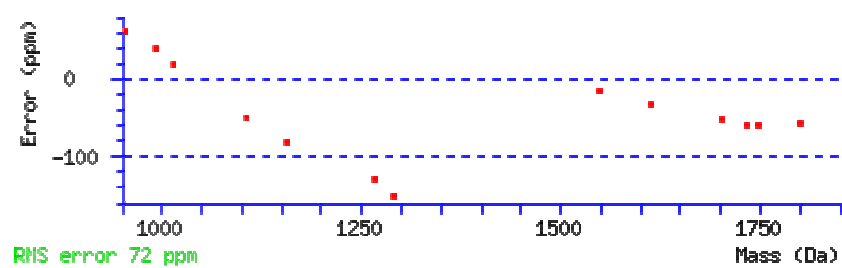

#### 14 ATP synthase subunit d, mitochondrial

Number of mass values searched: **150**

Number of mass values matched: **8**

Sequence Coverage: **67%**

Matched peptides shown in **Bold Red**

**1 MAGRKLALKT IDWVSFVEVM PQNQKAIGNA LKSWNETFHA RLASLSEKPP**

**51 AIDWAYYRAN VAKPGLVDDF EKYNALKIP VPEDKYTALV DQEEKEDVKS**

**101 CAEFVSGSQL RIQEYEQLE KMRNIIPFDQ MTIDDLNEIF PETKLDKKKY**

**151 PYWPHQPIEN L**

| Start - End      | Observed         | Mr(expt)         | Mr(calc)         | Delta          | Miss     | Sequence                                       |
|------------------|------------------|------------------|------------------|----------------|----------|------------------------------------------------|
| <b>10 - 25</b>   | <b>1936.8241</b> | <b>1935.8168</b> | <b>1935.9401</b> | <b>-0.1232</b> | <b>0</b> | <b>K.TIDWVSFVEVMPQNK.A</b> Oxidation (M)       |
| <b>26 - 41</b>   | <b>1814.7393</b> | <b>1813.7320</b> | <b>1813.9223</b> | <b>-0.1903</b> | <b>1</b> | <b>K.AIGNALKSWNETFHAR.L</b>                    |
| <b>33 - 41</b>   | <b>1147.4589</b> | <b>1146.4516</b> | <b>1146.5206</b> | <b>-0.0690</b> | <b>0</b> | <b>K.SWNETFHAR.L</b>                           |
| <b>42 - 58</b>   | <b>1979.9032</b> | <b>1978.8959</b> | <b>1979.0152</b> | <b>-0.1193</b> | <b>0</b> | <b>R.LASLSEKPPAIDWAYYR.A</b>                   |
| <b>86 - 99</b>   | <b>1666.7284</b> | <b>1665.7211</b> | <b>1665.8097</b> | <b>-0.0886</b> | <b>1</b> | <b>K.YTALVDQEEKEDVK.S</b>                      |
| <b>100 - 111</b> | <b>1340.4508</b> | <b>1339.4435</b> | <b>1339.6190</b> | <b>-0.1755</b> | <b>0</b> | <b>K.SCAEFVSGSQLR.I</b>                        |
| <b>124 - 144</b> | <b>2509.1948</b> | <b>2508.1875</b> | <b>2508.2094</b> | <b>-0.0219</b> | <b>0</b> | <b>R.NIIPFDQMTIDDLNEIFPETK.L</b> Oxidation (M) |
| <b>149 - 161</b> | <b>1684.7595</b> | <b>1683.7522</b> | <b>1683.8409</b> | <b>-0.0887</b> | <b>1</b> | <b>K.KYPYWPHQPIENL.-</b>                       |

No match to: 900.3402, 906.5959, 915.3600, 917.3668, 923.5369, 926.5962, 931.5869, 933.3480, 939.3262, 947.5634, 952.6024, 955.3016, 961.3044, 967.5056, 971.5976, 977.2591, 985.5657, 1000.5555, 1002.5640, 1016.5448, 1028.5488, 1031.5244, 1034.1283, 1045.5507, 1052.0839, 1058.5228, 1066.0538, 1072.5325, 1084.4735, 1088.5188, 1089.5043, 1096.4912, 1103.5095, 1106.4724, 1109.4396, 1118.5009, 1124.4475, 1130.4602, 1142.5109, 1157.5010, 1165.4971, 1173.4948, 1179.4921, 1189.4740, 1194.4952, 1204.4558, 1217.4536, 1233.4580, 1242.5551, 1262.4578, 1265.4987, 1277.5402, 1300.3571, 1307.4741, 1320.3993, 1339.5453, 1354.4724, 1365.4218, 1383.4708, 1391.5486, 1410.6625, 1434.7455, 1436.7848, 1443.6805, 1458.7479, 1469.8577, 1475.7863, 1487.8678, 1489.8856, 1507.8624, 1516.7925, 1531.8380, 1540.9054, 1547.8232, 1549.8419, 1555.8191, 1563.8087, 1571.7832, 1578.8257, 1593.7690, 1595.7451, 1604.8522, 1634.8525, 1657.7339, 1675.8142, 1692.7637, 1699.7480, 1707.6941, 1716.7557, 1741.7010, 1750.7180, 1762.7275, 1764.6554, 1766.6686, 1777.6697, 1780.6873, 1791.6566, 1794.7014, 1838.8149, 1851.8051, 1890.8488, 1921.8054, 1940.7982, 1961.8646, 1993.8615, 2017.8478, 2045.8843, 2063.8875, 2082.8513, 2149.9697, 2167.0110, 2183.9993, 2193.9814, 2225.0205, 2233.9934, 2248.9966, 2266.0452, 2280.0667, 2283.0928, 2298.1028, 2307.0779, 2322.0691, 2336.1055, 2342.9521, 2353.1443, 2367.1899, 2383.9441, 2399.0112, 2421.1753, 2447.1636, 2456.1721, 2474.0139, 2487.1814, 2503.2190, 2526.1838, 2565.2556, 2637.3240, 2705.3354, 2746.6128, 2780.6450, 2872.6743, 3053.0813

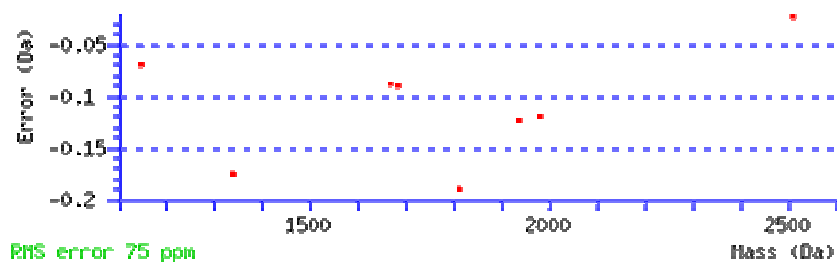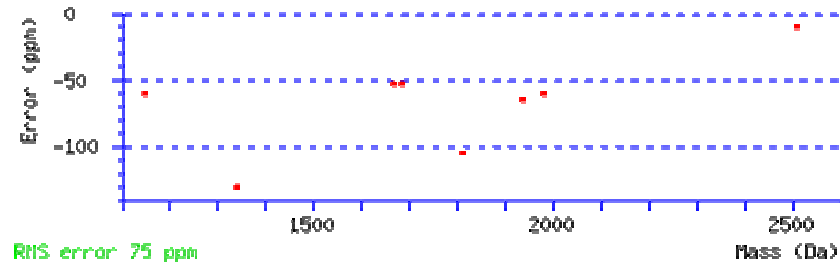

**15 26S proteasome non-ATPase regulatory subunit 10**

Number of mass values searched: **200**

Number of mass values matched: **10**

Sequence Coverage: **53%**

Matched peptides shown in **Bold Red**

**1 MEGCVSNIMI CNLAYSGKLD ELKERILADK SLATRTDQDS RTALHWACS**  
**51 GHTEIVEFLL QLGVPVNDKD DAGWSPLHIA ASAGRDEIVK ALLVKGAVHN**  
**101 AVNQNGCTPL HYAASKNRHE IAVMLLEGGA NPDAKDHYDA TAMHRAAAKG**  
**151 NLKMOVHILLF YKASTNIQDT EGNTPLHLAC DEERVEEAKF LVTQGASIYI**  
**201 ENKEEKTPLQ VAKGGLGLIL KRLAEGEEAS M**

| Start - End      | Observed         | Mr(expt)         | Mr(calc)         | Delta          | Miss     | Sequence                                           |
|------------------|------------------|------------------|------------------|----------------|----------|----------------------------------------------------|
| <b>1 - 18</b>    | <b>2046.9258</b> | <b>2045.9185</b> | <b>2045.9043</b> | <b>0.0143</b>  | <b>0</b> | <b>-.MEGCVSNIMICNLAYSGK.L</b>                      |
| <b>1 - 23</b>    | <b>2661.3513</b> | <b>2660.3440</b> | <b>2660.2318</b> | <b>0.1122</b>  | <b>1</b> | <b>-.MEGCVSNIMICNLAYSGKLDLDELK.E</b> Oxidation (M) |
| <b>2 - 18</b>    | <b>1931.7795</b> | <b>1930.7722</b> | <b>1930.8587</b> | <b>-0.0865</b> | <b>0</b> | <b>M.EGCVSNIMICNLAYSGK.L</b> Oxidation (M)         |
| <b>70 - 90</b>   | <b>2207.9792</b> | <b>2206.9719</b> | <b>2207.0971</b> | <b>-0.1252</b> | <b>1</b> | <b>K.DDAGWSPLHIAASAGRDEIVK.A</b>                   |
| <b>91 - 116</b>  | <b>2733.3152</b> | <b>2732.3079</b> | <b>2732.4180</b> | <b>-0.1101</b> | <b>1</b> | <b>K.ALLVKGAVHNAVNQNGCTPLHYAASK.N</b>              |
| <b>119 - 135</b> | <b>1780.7059</b> | <b>1779.6986</b> | <b>1779.8825</b> | <b>-0.1839</b> | <b>0</b> | <b>R.HEIAVMLLEGGANPDAK.D</b> Oxidation (M)         |
| <b>136 - 145</b> | <b>1232.4598</b> | <b>1231.4525</b> | <b>1231.5040</b> | <b>-0.0515</b> | <b>0</b> | <b>K.DHYDATAMHR.A</b> Oxidation (M)                |
| <b>154 - 162</b> | <b>1179.4990</b> | <b>1178.4917</b> | <b>1178.6522</b> | <b>-0.1605</b> | <b>0</b> | <b>K.MVHILLFYK.A</b> Oxidation (M)                 |
| <b>204 - 213</b> | <b>1142.5079</b> | <b>1141.5006</b> | <b>1141.6343</b> | <b>-0.1336</b> | <b>1</b> | <b>K.EEKTPLQVAK.G</b>                              |
| <b>207 - 221</b> | <b>1507.8539</b> | <b>1506.8466</b> | <b>1506.9497</b> | <b>-0.1031</b> | <b>1</b> | <b>K.TPLQVAKGGLGLILK.R</b>                         |

No match to: 900.3644, 906.5753, 913.5676, 916.6031, 922.6007, 925.5959, 928.5309, 935.5721, 938.5342, 941.5845, 948.5187, 954.3199, 960.5219, 963.5454, 968.6084, 971.3471, 977.6231, 982.5153, 985.5707, 996.6103, 1000.5548, 1002.5684, 1012.5680, 1016.5661, 1029.5419, 1031.5337, 1034.1263, 1040.5659, 1045.5588, 1052.0840, 1058.5236, 1065.9028, 1068.5065, 1074.5033, 1082.5470, 1089.5013, 1095.5142, 1102.5121, 1106.4840, 1109.4501, 1118.4954, 1125.4956, 1132.4751, 1139.4692, 1148.5221, 1151.6125, 1157.5060, 1165.6262, 1173.5217, 1191.4716, 1202.5277, 1210.5258, 1218.4580, 1225.4498, 1233.4426, 1242.5345, 1251.4763, 1263.4777, 1277.5328, 1284.4130, 1292.4723, 1302.5071, 1309.4733, 1320.3860, 1329.4855, 1339.5221, 1350.4656, 1357.4895, 1365.4424, 1383.4633, 1393.5481, 1410.6370, 1422.6089, 1436.7743, 1443.7432, 1450.6858, 1459.7644, 1464.8152, 1469.8455, 1475.7705, 1487.8674, 1489.8835, 1514.8231, 1522.7964, 1531.8386, 1546.8053, 1549.8311, 1555.8248, 1565.8049, 1571.7866, 1578.8204, 1585.7192, 1593.7654, 1604.8370, 1613.7240, 1622.7639, 1634.8442, 1638.7952, 1652.8221, 1660.7820, 1669.7804, 1677.7965, 1681.8007, 1699.7417, 1707.6747, 1716.7644, 1724.7715, 1735.6794, 1740.6359, 1750.7169, 1764.6361, 1766.6586, 1791.6179, 1794.6929, 1807.7968, 1819.6547, 1836.8147, 1838.8049, 1851.8031, 1859.8204, 1867.7911, 1879.7777, 1899.7875, 1910.7589, 1922.7797, 1940.8005, 1949.8368, 1965.9214, 1978.8486, 1993.8479, 2001.8749, 2014.8552, 2022.9125, 2030.8977, 2055.8884, 2077.9014, 2096.8513, 2105.9434, 2121.9312, 2135.9998, 2149.9595, 2166.9878, 2185.9692, 2194.9309, 2225.0173, 2234.0042, 2250.0308, 2266.0232, 2282.0881, 2284.0779, 2298.0916, 2307.0693, 2318.0771, 2328.0830, 2336.0791, 2349.1470, 2358.0867, 2368.1155, 2374.1138, 2383.8975, 2398.9802, 2417.1870, 2420.1738, 2432.1580, 2446.1729, 2448.1553, 2457.1958, 2462.1841, 2482.1694, 2487.1594, 2501.2454, 2510.1592, 2565.3320, 2584.2529, 2594.2908, 2609.2959, 2626.3350, 2636.3113, 2651.4614, 2692.5637, 2705.2827, 2720.4263, 2780.6279, 2831.4231, 2872.6416, 2888.6665, 2902.6963, 2932.8181, 2981.8923, 3053.0422

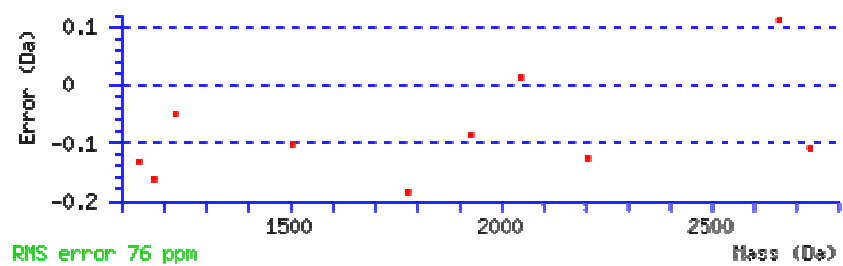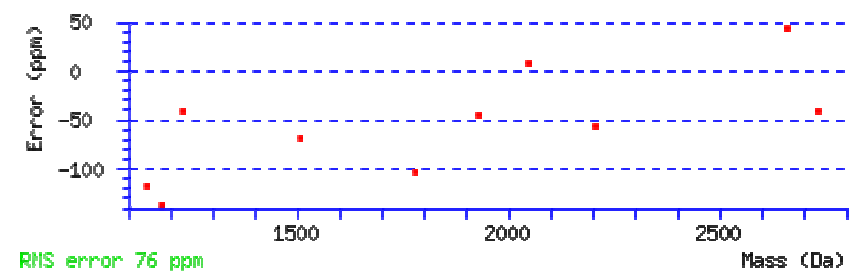



## 16 N-acetyltransferase 9

Number of mass values searched: **200**

Number of mass values matched: **11**

Sequence Coverage: **41%**

Matched peptides shown in **Bold Red**

**1 MKLNQNTMLV GK**KVVLVPYT SEHVPYHEW **MKSEELR**HLT ASEQLTLQQE

**51 YEMQCSWCED EDKCTFIVLD AEKWAQPRP PEESCMVGDV NLFLTDLEDP**

**101 TLGEIEVMIA EPSYRRQGLG TEASLLIMSY GVTKLGLTKF EAKIGQENEP**

**151 SIRMFQKLHF KQVAMSNVFQ EVTLRLAVSE PERKWILEQT SHMEERPVRT**

**201 RKAEPVTATL SEQKSWNCPL PRPDGCMGDT SAVSSVCARL S**

**Start - End Observed Mr(expt) Mr(calc) Delta Miss Sequence**

**1 - 12 1376.5750 1375.5677 1375.7316 -0.1638 1 -.MKLNQNTMLVGK.K**

**3 - 12 1133.6028 1132.5955 1132.5910 0.0045 0 K.LNQNNTMLVGK.K Oxidation (M)**

**27 - 37 1507.8574 1506.8501 1506.6925 0.1576 1 R.YHEWMKSEELR.H**

**27 - 37 1523.8492 1522.8419 1522.6874 0.1545 1 R.YHEWMKSEELR.H Oxidation (M)**

**140 - 153 1617.7576 1616.7503 1616.8158 -0.0655 1 K.FEAKIGQENEPSIR.M**

**144 - 153 1142.5140 1141.5067 1141.5727 -0.0660 0 K.IGQENEPSIR.M**

**144 - 157 1676.8112 1675.8039 1675.8352 -0.0312 1 K.IGQENEPSIRMFQK.L**

**162 - 183 2503.1875 2502.1802 2502.2900 -0.1098 1 K.QVAMSNVFQEVTLRLAVSEPER.K**

**176 - 183 900.5750 899.5677 899.4712 0.0965 0 R.LAVSEPER.K**

**202 - 214 1401.6724 1400.6651 1400.7511 -0.0860 1 R.KAEPVTATLSEQK.S**

**215 - 239 2780.1545 2779.1472 2779.1935 -0.0463 0 K.SWNCPLPRPDGCMGDTSAVSSVCAR.L**

No match to: 906.5345, 909.0938, 910.6434, 917.3564, 924.6210, 926.6180, 931.5905, 937.5581, 940.6033, 947.6476, 950.5831, 956.6492, 958.5587, 964.5879, 971.5845, 976.6078, 982.5979, 985.5601, 996.6107, 1000.5515, 1002.5607, 1013.5504, 1029.5452, 1031.5265, 1034.1281, 1044.5321, 1045.5519, 1052.0909, 1058.5214, 1066.0316, 1072.5259, 1074.5211, 1082.0197, 1084.4675, 1089.4978, 1097.5245, 1102.5087, 1106.4767, 1112.4570, 1118.4990, 1125.5664, 1137.5472, 1148.5446, 1159.4950, 1165.6100, 1173.4840, 1179.4863, 1191.4762, 1200.5238, 1215.5497, 1218.4252, 1225.4904, 1233.4443, 1242.5505, 1255.5734, 1260.9679, 1268.5453, 1277.5399, 1295.5298, 1302.5310, 1307.4946, 1314.5453, 1320.4025, 1335.6484, 1339.5251, 1354.4729, 1364.4512, 1383.4739, 1393.5691, 1410.6526, 1417.7589, 1427.6837, 1434.7767, 1436.7815, 1443.7201, 1463.8158, 1469.8658, 1475.7794, 1487.8729, 1489.8871, 1515.7711, 1527.8312, 1531.8423, 1544.9702, 1547.8007, 1549.8361, 1555.8276, 1565.8209, 1571.7906, 1578.8313, 1586.8000, 1593.7640, 1595.7448, 1604.8441, 1624.6813, 1634.8428, 1649.7988, 1655.7828, 1660.8080, 1669.8069, 1695.7955, 1704.7847, 1707.6990, 1716.7566, 1734.7078, 1750.7072, 1762.7203, 1764.6462, 1766.6653, 1777.6819, 1780.6890, 1791.6431, 1794.7030, 1802.7133, 1816.6776, 1832.6726, 1837.8291, 1851.7939, 1861.7999, 1884.7656, 1899.8408, 1913.8495, 1940.8002, 1948.8171, 1960.8273, 1968.7963, 1983.7482, 1993.8577, 2007.8208, 2025.8634, 2036.8702, 2044.9174, 2050.8826, 2063.9097, 2082.8701, 2094.9194, 2112.8691, 2154.9314, 2167.0054, 2185.9998, 2193.9797, 2207.9937, 2222.0569, 2225.0259, 2234.0110, 2249.9912, 2263.0400, 2265.0505, 2280.0750, 2283.0962, 2296.1064, 2298.1055, 2307.0715, 2322.0889, 2336.1072, 2342.9648, 2353.1555, 2367.1882, 2383.9150, 2399.0608, 2421.1829, 2434.1609, 2446.1904, 2448.1638, 2457.1931, 2462.2144, 2481.1672, 2487.1792, 2511.2017, 2525.1890, 2543.2598, 2558.2981, 2565.2505, 2592.2944, 2609.3147, 2637.3235, 2652.3406, 2662.4849, 2689.4727, 2705.3130, 2720.4409, 2737.5159, 2747.5793, 2758.6272, 2814.6250, 2872.6436, 2902.7009, 2951.7778, 2965.7861

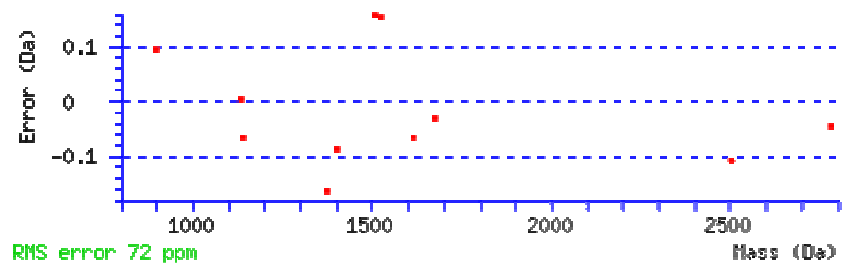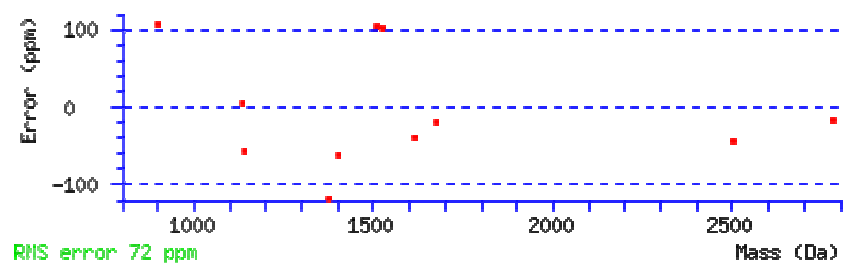

## 17 Prohibitin

Number of mass values searched: **100**

Number of mass values matched: **7**

Sequence Coverage: **37%**

Matched peptides shown in **Bold Red**

**1** MAAKVFESIG **KFGLALAVAG GVVNSALYNV DAGHRAVIFD** RFRGVQDIVV  
**51** GEGTHFLIPW VQKPIIFDCR SRPRNPVIT GSKDLQNVNI TLR**ILFRPVA**  
**101** **SQLPRIYTSI GEDYDER**VLP SITTEILKSV VAR**FDAGELI TQRELVSRQV**  
**151** SDDLTER**AAT FGLILDDVSL THLTFGKEFT** EAVEAK**QVAQ QEAERARFVV**  
**201** EKAEQQKAA IISAEGDSKA AELIANSLAT AGDGLIEL**RK LEAAEDIAYQ**  
**251** **LSR**SRNITYL PAGQSVLLQL PQ

| Start - End      | Observed         | Mr(expt)         | Mr(calc)         | Delta          | Miss     | Sequence                            |
|------------------|------------------|------------------|------------------|----------------|----------|-------------------------------------|
| <b>12 - 35</b>   | <b>2371.1909</b> | <b>2370.1836</b> | <b>2370.2444</b> | <b>-0.0608</b> | <b>0</b> | <b>K.FGLALAVAGGVVNSALYNVDAGHR.A</b> |
| <b>94 - 105</b>  | <b>1396.6680</b> | <b>1395.6607</b> | <b>1395.8350</b> | <b>-0.1743</b> | <b>0</b> | <b>R.ILFRPVASQLPR.I</b>             |
| <b>106 - 117</b> | <b>1460.6779</b> | <b>1459.6706</b> | <b>1459.6467</b> | <b>0.0239</b>  | <b>0</b> | <b>R.IYTSIGEDYDER.V</b>             |
| <b>134 - 143</b> | <b>1149.5079</b> | <b>1148.5006</b> | <b>1148.5826</b> | <b>-0.0820</b> | <b>0</b> | <b>R.FDAGELITQR.E</b>               |
| <b>158 - 177</b> | <b>2119.0251</b> | <b>2118.0178</b> | <b>2118.1361</b> | <b>-0.1183</b> | <b>0</b> | <b>R.AATFGLILDDVSLTHLTFGK.E</b>     |
| <b>187 - 195</b> | <b>1058.5226</b> | <b>1057.5153</b> | <b>1057.5152</b> | <b>0.0001</b>  | <b>0</b> | <b>K.QVAQQEAER.A</b>                |
| <b>240 - 253</b> | <b>1606.8033</b> | <b>1605.7960</b> | <b>1605.8362</b> | <b>-0.0402</b> | <b>1</b> | <b>R.KLEAAEDIAYQLSR.S</b>           |

No match to: 910.6238, 915.5768, 920.5528, 926.6274, 931.5954, 941.6123, 949.5977, 958.5903, 985.5637, 996.6186, 1000.5536, 1002.5673, 1029.5404, 1031.5350, 1034.1337, 1045.5547, 1052.0923, 1066.0437, 1074.5144, 1084.4730, 1089.5061, 1106.4911, 1118.5052, 1142.5106, 1163.5127, 1173.5074, 1179.4996, 1186.5367, 1191.4905, 1218.4469, 1233.4480, 1242.5549, 1277.5366, 1307.4734, 1320.4009, 1339.5403, 1354.5302, 1436.7802, 1474.7271, 1487.8754, 1489.8889, 1507.8597, 1531.8433, 1549.8402, 1555.8237, 1562.8181, 1571.7871, 1578.8301, 1593.7590, 1604.8502, 1620.7998, 1634.8531, 1648.8066, 1660.8152, 1669.7982, 1678.8263, 1699.7516, 1707.7014, 1716.7633, 1765.6523, 1780.6987, 1791.6367, 1794.7002, 1837.8344, 1851.8066, 1940.7999, 1993.8557, 2011.9702, 2149.9807, 2166.9944, 2193.9895, 2225.0215, 2234.0093, 2248.9778, 2265.0483, 2282.0859, 2284.0852, 2298.0901, 2307.0747, 2322.0723, 2354.1365, 2383.9204, 2421.1790, 2446.1707, 2448.1599, 2487.1680, 2503.1738, 2525.1604, 2565.2380, 2609.3035, 2637.3110, 2705.2937, 2780.6377

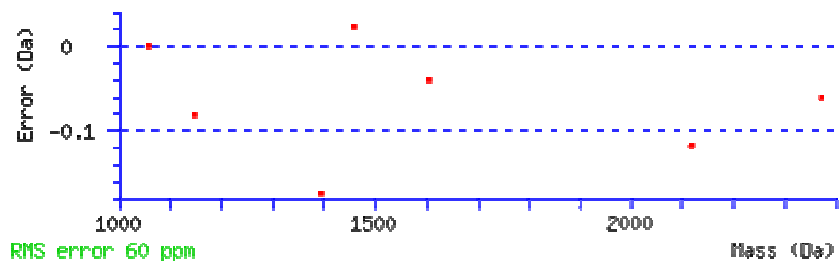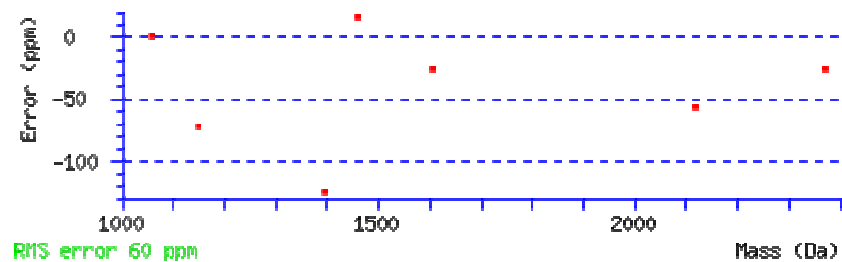

### 18 TIP41-like protein

Number of mass values searched: **100**

Number of mass values matched: **7**

Sequence Coverage: **32%**

Matched peptides shown in **Bold Red**

**1 MMIHGFQSSH QDFSFGPWK** TASKTHIMKS ADVEK**LADEL HMPSLPEMMF**  
**51 GDNVLR**IQHG SGFGIEFNAT DALRCVNNYQ GMLKVACAAE WQESRTEGEH  
**101 SKEVIKPYDW TYTTDYK****GL LGESLKLKVV PTTDHIDTEK LK**AREQIKFF  
**151 EEVLLFEDEL HDHGVSSLSV KIRVMPSSFF LLLRFFLRID** GVLIRMNDTR  
**201 LYHEADKTYM** LREYTSRESK IANLMHVPPS LFTEPNEISQ YLPIKEAVCE  
**251 KLVFPERIDP** NPVDSQSTPS E

| Start - End      | Observed         | Mr(expt)         | Mr(calc)         | Delta          | Miss     | Sequence                                         |
|------------------|------------------|------------------|------------------|----------------|----------|--------------------------------------------------|
| <b>1 - 19</b>    | <b>2283.0869</b> | <b>2282.0796</b> | <b>2282.0038</b> | <b>0.0759</b>  | <b>0</b> | <b>-.MMIHGFQSSHQDFSFGPWK.L</b> Oxidation (M)     |
| <b>2 - 19</b>    | <b>2135.9873</b> | <b>2134.9800</b> | <b>2134.9684</b> | <b>0.0117</b>  | <b>0</b> | <b>M.MIHGFQSSHQDFSFGPWK.L</b>                    |
| <b>36 - 56</b>   | <b>2447.1533</b> | <b>2446.1460</b> | <b>2446.1331</b> | <b>0.0130</b>  | <b>0</b> | <b>K.LADELHMPSLPEMMFGDNVLR.I</b> 2 Oxidation (M) |
| <b>118 - 126</b> | <b>917.3693</b>  | <b>916.3620</b>  | <b>916.5229</b>  | <b>-0.1609</b> | <b>0</b> | <b>K.GTLLGESLK.L</b>                             |
| <b>129 - 142</b> | <b>1595.7458</b> | <b>1594.7385</b> | <b>1594.8566</b> | <b>-0.1181</b> | <b>1</b> | <b>K.VVPTTDHIDTEK.LK.A</b>                       |
| <b>172 - 184</b> | <b>1578.8314</b> | <b>1577.8241</b> | <b>1577.9116</b> | <b>-0.0875</b> | <b>1</b> | <b>K.IRVMPSSFFLLLR.F</b>                         |
| <b>201 - 212</b> | <b>1555.8402</b> | <b>1554.8329</b> | <b>1554.7500</b> | <b>0.0829</b>  | <b>1</b> | <b>R.LYHEADKTYMLR.E</b> Oxidation (M)            |

**No match to:** 905.5483, 911.6208, 926.6006, 931.5907, 940.6144, 948.5227, 954.5648, 968.6176, 982.6210, 985.5685, 996.6229, 1001.5633, 1030.5509, 1034.1282, 1045.5642, 1052.0907, 1058.5316, 1066.0530, 1068.5076, 1074.5179, 1084.4882, 1088.5220, 1106.4834, 1108.4161, 1118.5062, 1125.4896, 1132.4779, 1142.5087, 1150.4523, 1165.6134, 1173.5037, 1179.5028, 1191.4863, 1217.4708, 1233.4490, 1260.9608, 1277.5498, 1307.4872, 1320.4063, 1339.5424, 1350.4784, 1383.4742, 1436.7903, 1475.7877, 1489.8899, 1507.8710, 1531.8561, 1549.8500, 1562.8350, 1571.8037, 1593.7742, 1604.8457, 1617.7338, 1624.6820, 1634.8373, 1638.7954, 1659.6559, 1676.8215, 1699.7543, 1707.7002, 1716.7683, 1766.6678, 1780.7062, 1791.6403, 1794.7006, 1816.7245, 1837.8071, 1851.8101, 1899.8243, 1913.8098, 1940.8141, 1959.7721, 1993.8442, 2098.8999, 2192.9622, 2225.0212, 2233.9976, 2248.9966, 2266.0520, 2272.9521, 2298.0991, 2307.0706, 2322.0693, 2346.0481, 2383.9138, 2420.1638, 2487.1672, 2501.2249, 2510.1855, 2527.1516, 2584.2654, 2705.3140, 2779.6067

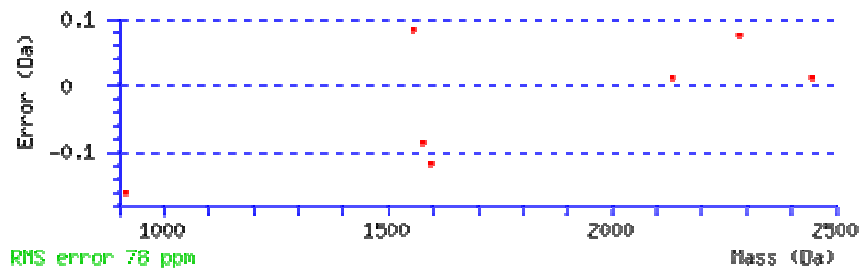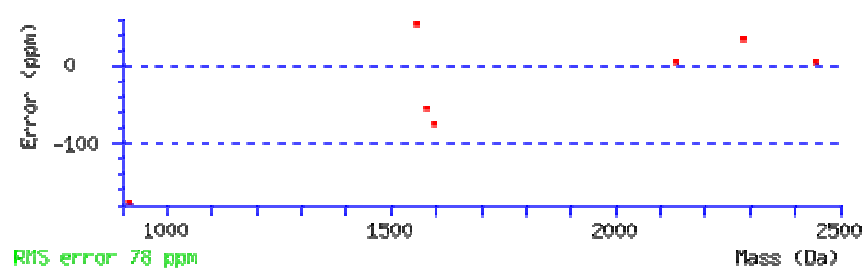

### 19 Nuclear distribution protein nudE homolog 1

Number of mass values searched: **200**

Number of mass values matched: **12**

Sequence Coverage: **40%**

Matched peptides shown in **Bold Red**

**1 MEDSGKTFES EEEETNYWRD LAMTYKQRAE NTQEELREFQ EGSREYEAEEL**

**51 EAQLQIETR** NRDLLSENNR LRMELESVKE KFEMQHSEGY RQISALEDDL

**101 AQTKAIKQDL QKYIRELEQA NDDLERA**KRA** TIMSLED**FEQ** RLNQAIERNA**

**151 FLESELDEKE NLLESVQRLK DEARDLR**QEL** AVQ**QKQDKPR** TPMPG**SGQAK****

**201 RTDMAVQATG SVPSTPVAHR** GPSSGLNTPG MFRRGLDSSST SGTPLTPAAR

**251 ISALNIVGDL LRVGALESK L**ASCRN**FM**YD** QSP**SRTSGPA** SGR**GTK**NRDG**

**301 VDRRPGSTSV GDKGSGKRLE FGKPASEPAS PALPSAQGVV KLLL**

Start - End Observed Mr(expt) Mr(calc) Delta Miss Sequence

**1 - 19 2367.1699 2366.1626 2365.9644 0.1982 1 -.MEDSGKTFE**EEEEETNYWR.D****

**29 - 37 1089.5225 1088.5152 1088.5098 0.0054 0 R.AENTQEELR.E**

**29 - 44 1922.7892 1921.7819 1921.8766 -0.0946 1 R.AENTQEELREFQ**EGSR.E****

**45 - 60 1949.8564 1948.8491 1948.9377 -0.0886 0 R.EYEA**LEAQLQIETR.N****

**129 - 141 1595.7451 1594.7378 1594.7773 -0.0395 1 K.RATIM**SLEDFEQR.L****

**130 - 148 2280.0591 2279.0518 2279.1216 -0.0697 1 R.ATIM**SLEDFEQLNQAIER.N**** Oxidation (M)

**178 - 185 943.5264 942.5191 942.5134 0.0057 0 R.QELAV**QK.Q****

**186 - 200 1613.7577 1612.7504 1612.7991 -0.0487 1 K.QDKPRT**PMPGSGQAK.R**** Oxidation (M)

**202 - 220 1940.7983 1939.7910 1939.9422 -0.1512 0 R.TDMAVQATGSVPSTPVAHR**.G**** Oxidation (M)

**271 - 285 1831.7089 1830.7016 1830.8141 -0.1125 1 K.LASCRN**FM**YDQSP**SRT**.T**

**276 - 293 1973.7650 1972.7577 1972.8697 -0.1120 1 R.NFM**YDQSPSRTSGPASGR.G**** Oxidation (M)

**286 - 296 1018.5042 1017.4969 1017.5203 -0.0234 1 R.TSG**PASGRGK.N****

No match to: 905.6373, 909.0955, 915.5867, 922.6414, 925.6002, 931.5844, 937.4207, 950.6007, 953.3260, 959.5387, 966.5485, 968.5987, 975.4822, 982.6261, 985.5653, 996.6160, 1002.5701, 1028.1187, 1034.1261, 1044.0862, 1052.0951, 1058.5317, 1060.0507, 1066.0568, 1072.0615, 1075.5520, 1082.0081, 1088.0295, 1097.9819, 1103.9811, 1106.4950, 1119.5101, 1126.4972, 1135.5474, 1142.4967, 1151.6384, 1157.5088, 1162.4731, 1165.6495, 1179.5018, 1191.4890, 1218.4521, 1233.4529, 1239.9972, 1254.9518, 1261.9669, 1270.9199, 1276.9283, 1292.8920, 1300.3606, 1307.4904, 1316.4541, 1320.3954, 1329.5042, 1334.6627, 1339.5447, 1350.4692, 1354.4646, 1369.4629, 1377.4229, 1383.4705, 1406.5629, 1436.7889, 1469.8647, 1475.7852, 1487.8748, 1489.8916, 1498.0427, 1507.8630, 1515.7350, 1524.7726, 1531.8069, 1540.8894, 1549.8446, 1555.8352, 1562.7948, 1571.7882, 1578.8430, 1581.7450, 1588.6925, 1604.8394, 1622.7395, 1628.7584, 1638.7861, 1655.7479, 1670.2968, 1678.8091, 1699.7811, 1707.6793, 1716.7522, 1724.8387, 1742.7316, 1750.7052, 1760.7312, 1764.6462, 1766.6686, 1778.6855, 1780.6963, 1788.6838, 1791.6401, 1794.6986, 1802.7079, 1806.7583, 1813.7811, 1816.7009, 1826.6119, 1837.8350, 1851.8116, 1860.7385, 1871.8071, 1884.6288, 1897.7715, 1912.6924, 1965.9309, 1984.8228, 1993.8553, 2007.7238, 2015.8468, 2023.8359, 2031.8649, 2037.8372, 2050.9009, 2064.9116, 2082.8828, 2095.8892, 2106.7288, 2135.9851, 2149.9761, 2166.9866, 2184.0149, 2193.9829, 2207.9673, 2222.0286, 2225.0239, 2233.9998, 2239.0513, 2248.9856, 2263.0432, 2266.0483, 2298.1001, 2307.0608, 2322.0679, 2336.1018, 2349.1455, 2354.1206, 2383.9114, 2399.0269, 2418.1741, 2421.1829, 2434.1436, 2440.1172, 2446.1702, 2448.1616, 2458.1770, 2462.1541, 2477.0747, 2481.1750, 2487.1714, 2499.2290, 2502.2217, 2511.1855, 2525.1943, 2565.2957, 2584.2615, 2590.3147, 2609.3257, 2618.3706, 2637.3247, 2652.3301, 2664.4644, 2680.4490, 2692.4702, 2704.2983, 2707.5425, 2720.4434, 2749.5400, 2758.5981, 2771.6155, 2779.6313, 2814.5791, 2872.6655, 2884.6028, 2897.6401, 2902.6963, 2913.6414, 2932.8433, 3028.0457, 3053.0454

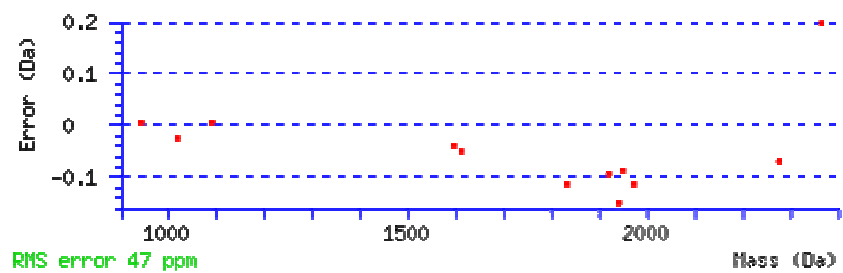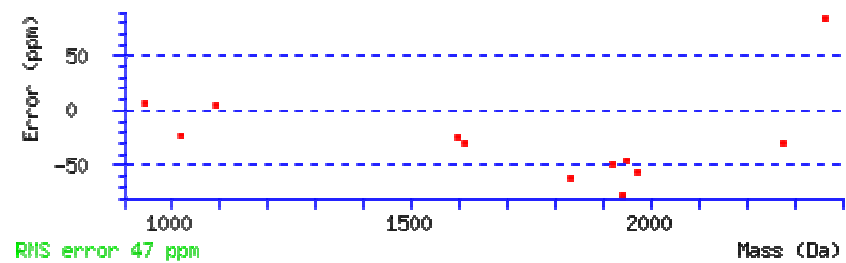

## 20 Annexin A4

Number of mass values searched: **75**

Number of mass values matched: **9**

Sequence Coverage: **34%**

Matched peptides shown in **Bold Red**

1 MEAK**GGTVKA ASGFNATEDA QTLR**KAMKGL **GTDEDAIIGI LAYR**NTAQRQ  
51 EIRSA**YKSTI** GRDLIEDLKS ELSSNFEQVI LGLMTP**TVLY DVQELRR**AMK  
101 **GAGTDEGCLI EILASR**TPEE IRRINQTYQQ QYGR**SLEEDI CS**DT**SFMFQR**  
151 VLVFLSAAGR **DEGNYLDDAL MK**QDAQELYE AGEKRWGTDE VKFLSILCSR  
201 NR**NHLLHVFD EYKRISQ**KDI EQSIKSETSG SFEDALLAIV KCMR**SKPSYF**  
251 **AERLYKSMKG** LGTDDNTLIR VMVSR**AEIDM LDIR**ASFKRL YGKSLYSFIK  
301 GDTSGDYRKV LLILCGGDD

| Start - End | Observed  | Mr(expt)  | Mr(calc)  | Delta   | Miss | Sequence                                  |
|-------------|-----------|-----------|-----------|---------|------|-------------------------------------------|
| 5 - 24      | 1993.8507 | 1992.8434 | 1992.9865 | -0.1431 | 1    | <b>K.GGTVKAASGFNATEDAQTLR.K</b>           |
| 29 - 44     | 1676.7900 | 1675.7827 | 1675.8781 | -0.0954 | 0    | <b>K.GLGTDEDAIIGILAYR.N</b>               |
| 101 - 116   | 1661.7462 | 1660.7389 | 1660.8090 | -0.0701 | 0    | <b>K.GAGTDEGCLIEILASR.T</b>               |
| 135 - 150   | 1964.7236 | 1963.7163 | 1963.8292 | -0.1129 | 0    | <b>R.SLEEDICSDTSFMFQR.V</b>               |
| 135 - 150   | 1980.7249 | 1979.7176 | 1979.8241 | -0.1065 | 0    | <b>R.SLEEDICSDTSFMFQR.V</b> Oxidation (M) |
| 161 - 172   | 1399.5013 | 1398.4940 | 1398.5973 | -0.1033 | 0    | <b>R.DEGNYLDDALMK.Q</b> Oxidation (M)     |
| 203 - 213   | 1414.5846 | 1413.5773 | 1413.7041 | -0.1268 | 0    | <b>R.NHLLHVDFEYK.R</b>                    |
| 245 - 253   | 1084.4880 | 1083.4807 | 1083.5349 | -0.0542 | 0    | <b>R.SKPSYFAER.L</b>                      |
| 276 - 284   | 1075.5310 | 1074.5237 | 1074.5379 | -0.0142 | 0    | <b>R.AEIDMLDIR.A</b>                      |

No match to: 909.0981, 915.0930, 924.4776, 932.3737, 941.4938, 948.4985, 954.5303, 960.3316, 996.6097, 1002.5620, 1034.1418, 1052.0997, 1058.5250, 1066.0594, 1090.5049, 1106.4828, 1179.4950, 1233.4436, 1247.5398, 1277.5452, 1307.4741, 1354.4323, 1436.7667, 1469.8391, 1475.7760, 1489.8767, 1507.8588, 1549.8378, 1555.8035, 1571.7837, 1578.8182, 1593.7509, 1638.7833, 1690.7921, 1699.7368, 1707.6826, 1716.7515, 1766.6605, 1779.6766, 1791.6576, 1794.6899, 1837.8162, 1851.7975, 1940.7950, 2094.9060, 2136.0002, 2149.9670, 2193.9385, 2225.0146, 2233.9968, 2248.9731, 2266.0332, 2298.0962, 2307.0591, 2322.0730, 2342.9834, 2383.9229, 2421.1760, 2448.1519, 2487.1748, 2501.2395, 2510.1714, 2705.3240, 2737.4905, 2780.1257, 2872.6599

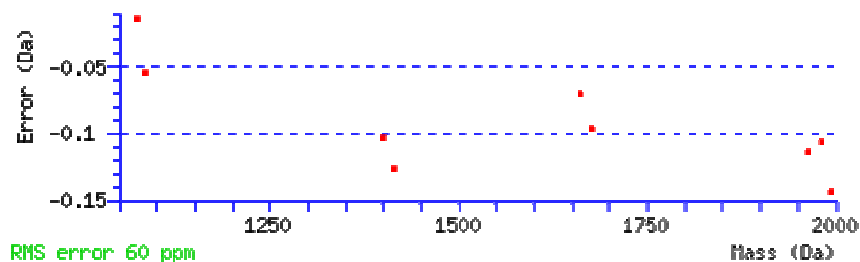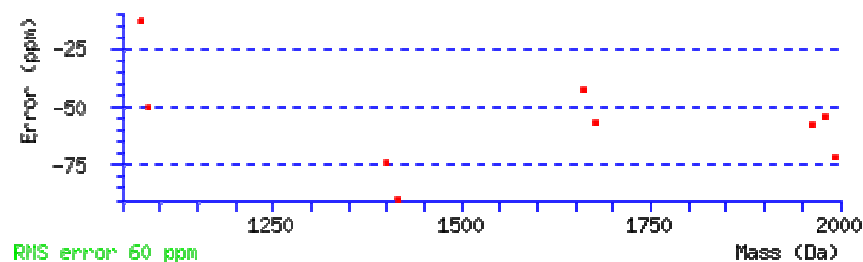

## 27 Optineurin

Number of mass values searched: **200**

Number of mass values matched: **21**

Sequence Coverage: **37%**

Matched peptides shown in **Bold Red**

1 MSHQPLSCLT EKGDSPCETP GNGPSNMVHP SLDTFTPEEL LQQMKELLVI  
51 NHQLK**EAMKL NNQAMKGR**FE ELSAWTEKQK EER**LLFEMQS KEVKER**LKAL  
101 THENERLKEE LGKFKEKSEK PLEDLTGGYR YPR**ALEEEVE KLK**TQVEQEV****  
151 **EHLKIQVMRL RAEKADLLGI VSELQLKLS GGSSSEDSFVE IR**MTEGETEG****  
201 **AMKEMKNCPT PTRTDPISLS NCTEDAR**SCA EFEELTVSQL LLCLREGNQK  
251 VERLEVALRE AKERISDFEK **KANGHSSTEK** QTARRADREK **EDKGQESVGS**  
301 **EVETLSIQVT SLFK**ELQEAH TKLSEAELMK KRLQEKCQAL ERK**NSATPSE**  
351 **LNEKQELVYS NKK**LELVES MRSEIKMEQA KTEEEKSRLA TLQATHNKLL  
401 QEHNKALKTI EELTKQAEK VDK**MLLQELS EKLEAEQAL ASKQLQMD**EM  
451 **KQTLAK**QEED LETMAVLRAQ MEVYCSDFHA ERAAREKIHE EK**EQLALQLA**  
501 **ILLKENNDIE EGSRQSLME MQCRHGARTS DSDQQTILFQ RGAEDRSWQH**  
551 GQQPRSIPIH SCPKCGEVLV DIDTLQIHVM DCII

| Start - End | Observed  | Mr(expt)  | Mr(calc)  | Delta   | Miss | Sequence                                          |
|-------------|-----------|-----------|-----------|---------|------|---------------------------------------------------|
| 56 - 66     | 1277.5313 | 1276.5240 | 1276.6267 | -0.1027 | 1    | <b>K.EAMKLNNQAMK.G</b>                            |
| 60 - 68     | 1031.5277 | 1030.5204 | 1030.5342 | -0.0137 | 1    | <b>K.LNNQAMKGR.F</b>                              |
| 84 - 91     | 995.5765  | 994.5692  | 994.5157  | 0.0535  | 0    | <b>R.LLFEMQSK.E</b>                               |
| 134 - 141   | 946.5777  | 945.5704  | 945.4655  | 0.1050  | 0    | <b>R.ALEEEVEK.L</b>                               |
| 144 - 154   | 1339.5195 | 1338.5122 | 1338.6779 | -0.1657 | 0    | <b>K.TQVEQEVHLK.I</b>                             |
| 155 - 161   | 915.4681  | 914.4608  | 914.5484  | -0.0875 | 1    | <b>K.IQVMRLR.A</b>                                |
| 155 - 161   | 931.5854  | 930.5781  | 930.5433  | 0.0348  | 1    | <b>K.IQVMRLR.A</b> Oxidation (M)                  |
| 193 - 206   | 1571.7861 | 1570.7788 | 1570.6677 | 0.1111  | 1    | <b>R.MTEGETEGAMKEMK.N</b>                         |
| 204 - 213   | 1233.4766 | 1232.4693 | 1232.5642 | -0.0948 | 1    | <b>K.EMKNCPTPTR.T</b>                             |
| 214 - 227   | 1578.8303 | 1577.8230 | 1577.6991 | 0.1239  | 0    | <b>R.TDPISLSNCTEDAR.S</b>                         |
| 271 - 280   | 1058.5206 | 1057.5133 | 1057.5152 | -0.0019 | 1    | <b>K.KANGHSSTEK.Q</b>                             |
| 291 - 314   | 2610.3098 | 2609.3025 | 2609.3072 | -0.0047 | 1    | <b>K.EDKGQESVGSSEVETLSIQVTSLFK.E</b>              |
| 344 - 362   | 2150.9641 | 2149.9568 | 2150.0491 | -0.0923 | 1    | <b>K.NSATPSELNEKQELVYSNK.K</b>                    |
| 355 - 363   | 1108.4476 | 1107.4403 | 1107.5924 | -0.1521 | 1    | <b>K.QELVYSNKK.L</b>                              |
| 424 - 432   | 1106.4839 | 1105.4766 | 1105.5689 | -0.0923 | 0    | <b>K.MLLQELSEK.L</b> Oxidation (M)                |
| 433 - 451   | 2207.9756 | 2206.9683 | 2207.0813 | -0.1130 | 1    | <b>K.LELAEQALASKQLQMD</b> EMK.Q 2 Oxidation (M)   |
| 444 - 456   | 1595.7528 | 1594.7455 | 1594.7695 | -0.0239 | 1    | <b>K.QLQMD</b> EMK <b>QTLAK.Q</b> 2 Oxidation (M) |
| 493 - 504   | 1352.8967 | 1351.8894 | 1351.8438 | 0.0456  | 0    | <b>K.EQLALQLAILLK.E</b>                           |



**505 - 524 2398.9629 2397.9556 2397.9947 -0.0391 1 K.ENNDIEEGGSRQSLMEMQCR.H Oxidation (M)**

**525 - 541 2009.8732 2008.8659 2008.9351 -0.0692 1 R.HGARTSDSDQQTLYLFQR.G**

**529 - 541 1588.7577 1587.7504 1587.7165 0.0339 0 R.TSDSDQQTLYLFQR.G**

No match to: 905.5707, 909.0805, 921.5553, 927.5970, 937.3596, 940.6241, 948.5937, 951.6169, 958.5980, 966.4921, 971.6208, 982.4810, 985.5621, 1000.5552, 1002.5654, 1016.5394, 1028.1285, 1034.1306, 1044.0916, 1045.5579, 1052.0907, 1066.0525, 1072.0604, 1082.0201, 1088.0214, 1089.5052, 1095.5134, 1102.5315, 1118.4998, 1125.4321, 1128.4515, 1135.5459, 1141.4863, 1147.5325, 1158.5011, 1165.4845, 1173.5006, 1179.4980, 1191.4924, 1193.4980, 1201.4846, 1204.4799, 1218.4396, 1232.9685, 1254.9592, 1260.9625, 1265.4901, 1272.4257, 1276.9214, 1284.4333, 1292.8861, 1300.3650, 1307.4867, 1314.5107, 1320.3889, 1329.4707, 1336.4694, 1349.4595, 1354.4874, 1365.4272, 1379.4498, 1383.4741, 1390.5297, 1427.6563, 1434.7395, 1436.7767, 1450.8282, 1460.7836, 1469.8635, 1475.7855, 1487.8534, 1489.8929, 1496.7183, 1507.8619, 1517.7562, 1521.7742, 1524.7744, 1531.8385, 1544.0955, 1546.7988, 1549.8367, 1555.8242, 1562.8391, 1567.7212, 1593.7611, 1604.8420, 1630.7719, 1634.8572, 1638.7939, 1654.7887, 1657.7257, 1665.7529, 1669.7816, 1679.8275, 1695.7725, 1699.7306, 1707.6775, 1716.7540, 1724.7339, 1734.7012, 1741.6987, 1749.7036, 1762.7223, 1764.6439, 1766.6727, 1780.7083, 1791.6187, 1794.7073, 1804.7271, 1818.6827, 1832.7252, 1837.8167, 1851.8071, 1881.7748, 1890.8231, 1908.8248, 1932.8372, 1937.7863, 1940.8190, 1948.7841, 1959.7677, 1968.7468, 1979.8418, 1987.8240, 1993.8477, 2001.8467, 2019.8746, 2030.7764, 2050.8772, 2063.8840, 2082.8574, 2094.9287, 2135.9763, 2166.9639, 2184.0017, 2193.9695, 2221.0344, 2225.0249, 2233.9998, 2248.9900, 2263.0449, 2266.0327, 2280.0552, 2283.0945, 2296.1096, 2298.1040, 2307.0789, 2319.0457, 2342.9526, 2354.1489, 2367.1868, 2383.9124, 2420.1731, 2447.1462, 2458.1929, 2462.2109, 2480.2214, 2487.1929, 2503.1978, 2511.1895, 2525.1892, 2565.2463, 2584.2686, 2637.3157, 2648.4006, 2658.4504, 2663.4675, 2680.4475, 2690.4602, 2705.3086, 2737.4636, 2746.5803, 2756.5166, 2780.6328, 2814.6033, 2872.6624, 2902.7068, 2932.8232, 3053.0461

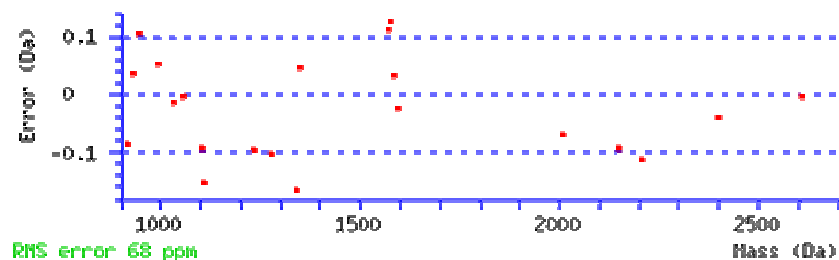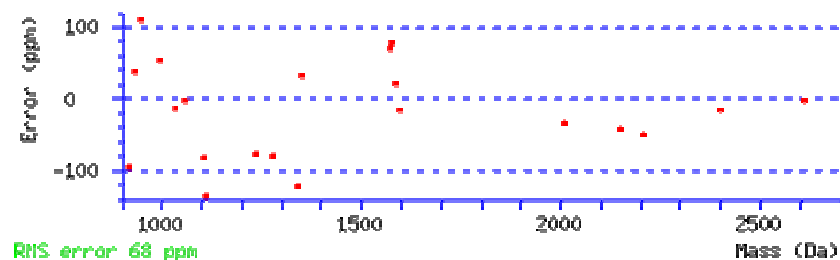

## 28 T-complex protein 1 subunit theta

Number of mass values searched: **100**

Number of mass values matched: **10**

Sequence Coverage: **18%**

Matched peptides shown in **Bold Red**

1 MALHVPKAPG FAQMLK**DGAK HFSGLEEAVY RNIQACK**ELA QTTRTAYGPN  
51 GMNK**MVINRL E**KLFVTNDAA TILRELEVQH PAAKMIVMAS HMQEQEVGDG  
101 TNFVLVFAGA LLELAEELLR IGLSVSEVIS GYEIACKKAH EILPELVCCS  
151 AKNLR**DVDEV S**LLRTSIMS KQYGSETFLA KLIAQACVSI FPDSGNFNVD  
201 NIR**VCKILGS GIYSSSVLHG MVFK**KETEGD VTSVKDAKIA VYSCPFDGMI  
251 TETKGTVLIK **TAEELMNFSK GEENLMDAQV K**AIAGTGANV IVTGGKVADI  
301 ALHYANKYNI MLVRLNSKWD LRRLCKTVGA TALPKLTPPV QEEMGHCDVS  
351 YLSEVGDTQV VVFK**HEKEDG AISTIVLR**GS TDNLMDDIER AVDDGVNTFK  
401 VLTRDKRLVP GGGATEIELA KQITSYGETC PGLEQYAIKK FAEAFEAIPIR  
451 ALAENSGVKA NEVISKLYSV HQEGNKNVGL DIEAEVPAVK DMLEASILDT  
501 YLGKYWAIKL ATNAAVTVLR VDQIIMAKPA GGPKPPSGK **DWDDQND**

| Start - End | Observed  | Mr(expt)  | Mr(calc)  | Delta   | Miss | Sequence                                       |
|-------------|-----------|-----------|-----------|---------|------|------------------------------------------------|
| 17 - 31     | 1678.8062 | 1677.7989 | 1677.8111 | -0.0121 | 1    | <b>K.DGAKHFSGLEEAVYR.N</b>                     |
| 21 - 31     | 1307.4884 | 1306.4811 | 1306.6306 | -0.1495 | 0    | <b>K.HFSGLEEAVYR.N</b>                         |
| 21 - 37     | 2022.0480 | 2021.0407 | 2020.9789 | 0.0619  | 1    | <b>K.HFSGLEEAVYRNIQACK.E</b>                   |
| 55 - 62     | 1002.5833 | 1001.5760 | 1001.5692 | 0.0069  | 1    | <b>K.MVINRLEK.L</b>                            |
| 156 - 165   | 1132.5157 | 1131.5084 | 1131.5772 | -0.0687 | 0    | <b>R.DVDEVSSLLR.T</b>                          |
| 204 - 224   | 2298.1067 | 2297.0994 | 2297.1912 | -0.0918 | 1    | <b>R.VCKILGSGIYSSSVLHGMVFK.K</b> Oxidation (M) |
| 261 - 281   | 2383.9243 | 2382.9170 | 2383.1035 | -0.1865 | 1    | <b>K.TAEELMNFSKGEENLMDAQVK.A</b>               |
| 271 - 281   | 1233.4465 | 1232.4392 | 1232.5707 | -0.1315 | 0    | <b>K.GEENLMDAQVK.A</b>                         |
| 365 - 378   | 1567.8021 | 1566.7948 | 1566.8365 | -0.0417 | 1    | <b>K.HEKEDGAISTIVLR.G</b>                      |
| 540 - 548   | 1150.4767 | 1149.4694 | 1149.4211 | 0.0484  | 1    | <b>K.KDWDDQND.-</b>                            |

No match to: 903.4845, 909.6007, 914.0999, 917.3636, 923.5176, 926.6054, 931.5978, 937.6195, 940.5468, 946.4162, 951.6740, 959.5707, 968.6669, 974.5239, 985.6049, 996.6190, 1018.2043, 1034.1799, 1045.5566, 1058.5337, 1083.6200, 1089.5247, 1106.4917, 1120.5242, 1142.5009, 1158.5245, 1165.5437, 1168.5566, 1175.5459, 1179.5264, 1191.5353, 1211.4087, 1228.5679, 1277.4966, 1314.5474, 1339.5243, 1353.9208, 1383.5035, 1398.5668, 1436.7914, 1475.8124, 1489.9166, 1492.9401, 1507.8480, 1514.5111, 1527.8988, 1530.7917, 1540.8794, 1549.8435, 1555.7957, 1572.7806, 1604.8276, 1638.7740, 1662.7578, 1670.7924, 1695.7520, 1707.7102, 1716.7864, 1747.6344, 1766.6891, 1779.6744, 1791.6260, 1794.7206, 1912.7236, 1939.8043, 1993.8506, 2050.0449, 2082.8477, 2094.9128, 2151.2603, 2192.9849, 2204.1514, 2222.2061, 2225.0278, 2265.0745, 2280.0725, 2283.0913, 2397.5723, 2421.1868, 2440.0955, 2446.1802, 2448.1743, 2456.7959, 2502.2224, 2637.3740, 2658.4514, 2688.3926, 2705.3130, 2746.5662, 2780.6248

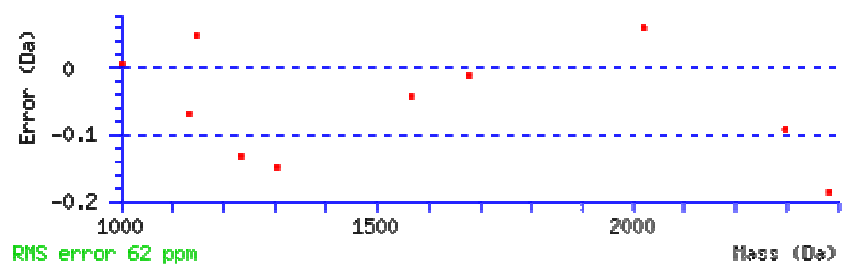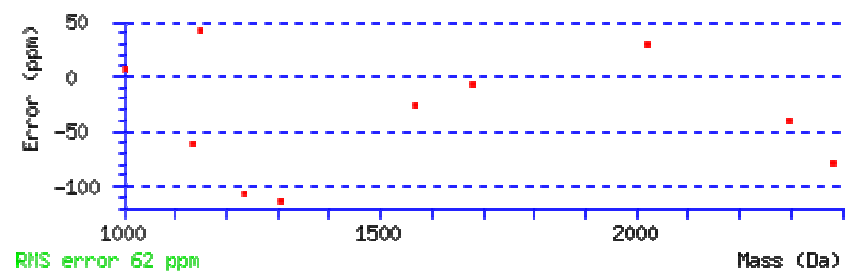

**29 T-complex protein 1 subunit theta**

Number of mass values searched: **75**

Number of mass values matched: **10**

Sequence Coverage: **19%**

Matched peptides shown in **Bold Red**

1 MALHVPKAPG FAQMLKDGAK **HFSGLEEAVY RNIQACKELA QTTRTAYGPN**  
51 **GMNKMVINRL E**KLFVTNDAA TILRELEVQH PAAKMIVMAS HMQEQEVGDG  
101 TNFVLVFAGA LLELAEELLR IGLSVSEVIS GYEIACKKAH EILPELVCCS  
151 AKNLRDDEV SLLRRTSIMS KQYGSETFLA KLIAQACVSI FPDGNGFNVD  
201 NIR**VCKILGS GIYSSSVLHG MVFK**KETEGD VTSVKDAKIA VYSCPFDGMI  
251 TETKGTVLIK **TAEELMNFSK GEENLMDAQV K**AIAGTGANV IVTGGKVADI  
301 ALHYANKYNI MLVRLNSKWD LRRLCKTVGA TALPKLTPPV QEEMGHCDV  
351 YLSEVGDQV VVFK**HEKEDG AISTIVLR**GS TDNLMDDIER AVDDGVNTFK  
401 VLTRDKR**LVP GGGATEIELA K**QITSYGETC PGLEQYAIKK FAEAFEIPR  
451 ALAENSGVKA NEVISKLYSV HQEGNKNVGL DIEAEVPAVK DMLEASILD  
501 YLGKYWAIKL ATNAAVTVLR VDQIIMAKPA GGPKPPSGKK DWDDQND

| Start - End | Observed  | Mr(expt)  | Mr(calc)  | Delta   | Miss | Sequence                                       |
|-------------|-----------|-----------|-----------|---------|------|------------------------------------------------|
| 21 - 31     | 1307.4912 | 1306.4839 | 1306.6306 | -0.1467 | 0    | <b>K.HFSGLEEAVYR.N</b>                         |
| 38 - 54     | 1851.8079 | 1850.8006 | 1850.8945 | -0.0938 | 1    | <b>K.ELAQTTRTAYGPNGMNK.M</b>                   |
| 45 - 54     | 1068.4998 | 1067.4925 | 1067.4706 | 0.0219  | 0    | <b>R.TAYGPNGMNK.M</b> Oxidation (M)            |
| 55 - 62     | 1002.5713 | 1001.5640 | 1001.5692 | -0.0051 | 1    | <b>K.MVINRLEK.L</b>                            |
| 204 - 224   | 2282.0938 | 2281.0865 | 2281.1963 | -0.1098 | 1    | <b>R.VCKILGSGIYSSSVLHGMVFK.K</b>               |
| 204 - 224   | 2298.0955 | 2297.0882 | 2297.1912 | -0.1030 | 1    | <b>R.VCKILGSGIYSSSVLHGMVFK.K</b> Oxidation (M) |
| 261 - 281   | 2383.9404 | 2382.9331 | 2383.1035 | -0.1704 | 1    | <b>K.TAEELMNFSKGEENLMDAQVK.A</b>               |
| 271 - 281   | 1233.4418 | 1232.4345 | 1232.5707 | -0.1362 | 0    | <b>K.GEENLMDAQVK.A</b>                         |
| 365 - 378   | 1567.7476 | 1566.7403 | 1566.8365 | -0.0962 | 1    | <b>K.HEKEDGAISTIVLR.G</b>                      |
| 408 - 421   | 1354.6520 | 1353.6447 | 1353.7504 | -0.1056 | 0    | <b>R.LVPGGGATEIELAK.Q</b>                      |

No match to: 907.5782, 916.5867, 928.5651, 940.3978, 950.5831, 960.5660, 967.4991, 985.5699, 996.6050, 1030.5259, 1034.1301, 1058.5345, 1066.0612, 1084.4938, 1089.5089, 1106.4717, 1108.4253, 1118.5027, 1141.4895, 1179.4961, 1190.4796, 1242.5585, 1277.5476, 1323.4613, 1339.5430, 1436.7833, 1475.7913, 1489.8870, 1507.8676, 1531.8503, 1549.8436, 1555.8381, 1571.7915, 1578.8353, 1595.7557, 1604.8418, 1638.8225, 1660.7957, 1707.6930, 1716.7474, 1750.7018, 1766.6682, 1780.6915, 1791.6464, 1794.6968, 1837.8099, 1880.8088, 1940.7992, 1993.8545, 2149.9670, 2192.9636, 2225.0176, 2233.9995, 2266.0496, 2284.0867, 2399.0337, 2421.1829, 2447.1570, 2487.1753, 2501.2361, 2510.1641, 2527.1545, 2636.3198, 2705.3054, 2780.1462

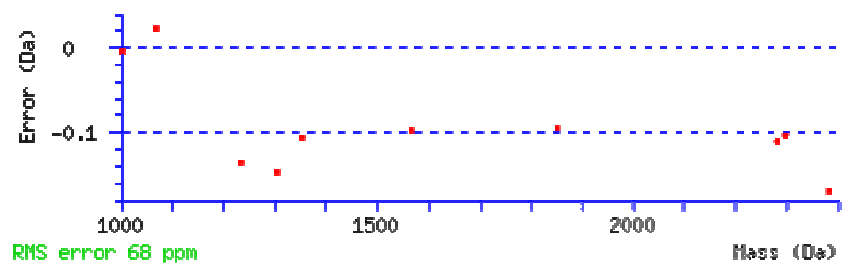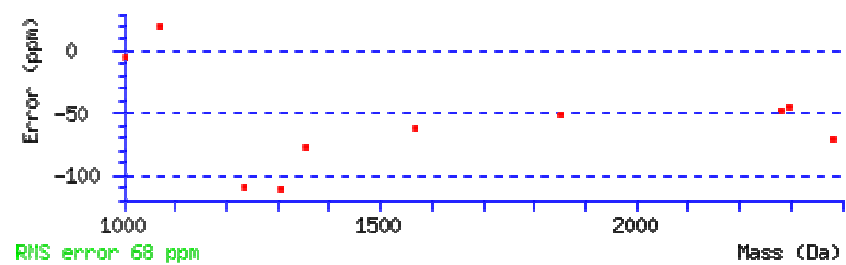

### 32 Tubulin alpha-1C chain

Number of mass values searched: **80**

Number of mass values matched: **11**

Sequence Coverage: **32%**

Matched peptides shown in **Bold Red**

1 MRECISIHVG QAGVQIGNAC WELYCLEHGI QPDGQMPSDK **TIGGGDDSF**  
51 **TFFSETGAGK** HVPR**AVFVDL EPTVIDEVRT** GTYR**QLFHPE QLITGK**EDAA  
101 NNYARGHYTI GKEIIDLVLDRIRKLADQCT GLQGFLVFHS FGGGTGSGFT  
151 SLLMERLSVD YGKSKLEFS IYPAPQVSTA VPEPNSILT THTTLEHSDC  
201 AFMVDNEAIY DICRRNLIDIE RPTYTNLNR**L ISQIVSSITA SLRFDGALNV**  
251 **DLTEFQTNLV PYPRI**HFPLA TYAPVISA EK AYHEQLTVAE ITNACFEPAN  
301 QMVKCDPR**HG KYMACCLLYR** GDVVPKDVNA AIATIKTKRT **IQFVDWCPTG**  
351 **FKVGINYQPP** TVVPGDLAK **VQRAVCMLSN TTAIAEAWAR** LDHKFDLMYA  
401 **KRAVHWYVG EGMEEGEFSE** AREDMAALEK DYEEVGADSA EGDDEGEEY

| Start - End | Observed  | Mr(expt)  | Mr(calc)  | Delta   | Miss | Sequence                                       |
|-------------|-----------|-----------|-----------|---------|------|------------------------------------------------|
| 41 - 60     | 2007.7927 | 2006.7854 | 2006.8858 | -0.1004 | 0    | <b>K.TIGGGDDSFNTFFSETGAGK.H</b>                |
| 65 - 79     | 1701.8024 | 1700.7951 | 1700.8985 | -0.1034 | 0    | <b>R.AVFVDLEPTVIDEVR.T</b>                     |
| 85 - 96     | 1410.6558 | 1409.6485 | 1409.7667 | -0.1182 | 0    | <b>R.QLFHPEQLITGK.E</b>                        |
| 230 - 243   | 1487.8921 | 1486.8848 | 1486.8719 | 0.0130  | 0    | <b>R.LISQIVSSITASLR.F</b>                      |
| 244 - 264   | 2409.1606 | 2408.1533 | 2408.2012 | -0.0479 | 0    | <b>R.FDGALNVDLTEFQTNLVYPYR.I</b>               |
| 309 - 320   | 1571.8037 | 1570.7964 | 1570.7207 | 0.0758  | 1    | <b>R.HGKYMACCLLYR.G</b>                        |
| 312 - 320   | 1265.4728 | 1264.4655 | 1264.5403 | -0.0747 | 0    | <b>K.YMACCLLYR.G</b> Oxidation (M)             |
| 340 - 352   | 1598.7268 | 1597.7195 | 1597.7599 | -0.0404 | 0    | <b>R.TIQFVDWCPTGFK.V</b>                       |
| 371 - 390   | 2264.0483 | 2263.0410 | 2263.1201 | -0.0791 | 1    | <b>K.VQRAVCMLSN TTAIAEAWAR.L</b> Oxidation (M) |
| 374 - 390   | 1864.7892 | 1863.7819 | 1863.8971 | -0.1152 | 0    | <b>R.AVCMLSN TTAIAEAWAR.L</b>                  |
| 402 - 422   | 2502.2117 | 2501.2044 | 2501.1070 | 0.0974  | 1    | <b>K.RAVHWYVVGEGMEEGEFSEAR.E</b> Oxidation (M) |

No match to: 908.5254, 918.5627, 924.5997, 985.5692, 1002.5760, 1031.5425, 1045.5627, 1058.5288, 1066.0055, 1082.0209, 1089.5013, 1106.4861, 1118.5035, 1141.4821, 1179.4958, 1233.4601, 1277.5382, 1300.3666, 1307.4841, 1320.4042, 1339.5182, 1354.3706, 1383.4714, 1393.5574, 1436.7714, 1475.7825, 1489.8914, 1507.8574, 1531.8452, 1549.8359, 1555.8304, 1578.8325, 1585.7266, 1604.8329, 1638.7928, 1657.7408, 1699.7365, 1716.7765, 1750.7057, 1763.6901, 1766.6666, 1780.6897, 1791.6418, 1794.6980, 1816.7054, 1837.8192, 1851.8066, 1940.7971, 1993.8508, 2149.9614, 2166.9902, 2193.9646, 2225.0181, 2236.0193, 2248.9897, 2281.0718, 2284.0845, 2298.0935, 2307.0745, 2342.9438, 2354.1311, 2368.1770, 2383.9070, 2399.0447, 2421.1721, 2448.1523, 2487.1663, 2510.1582, 2705.2986

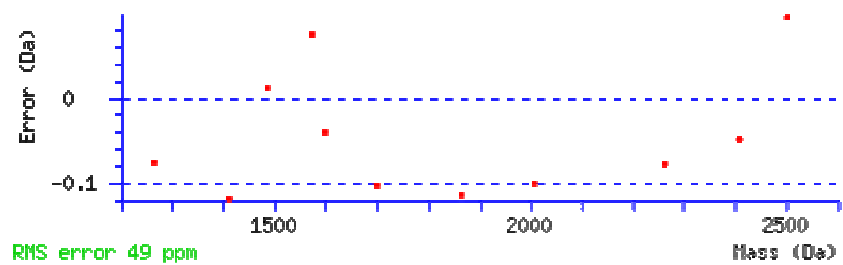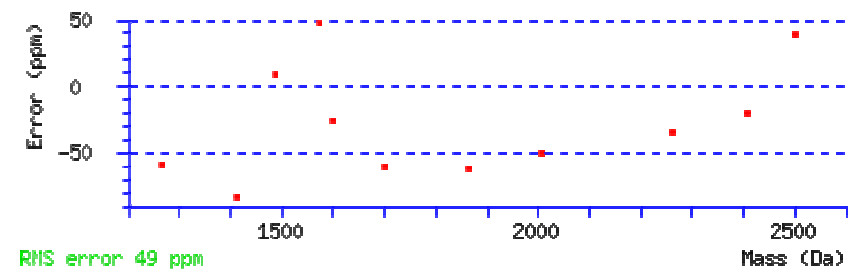

**33 Na(+)/H(+) exchange regulatory cofactor NHE-RF3**

Number of mass values searched: **200**

Number of mass values matched: **14**

Sequence Coverage: **38%**

Matched peptides shown in **Bold Red**

1 MASTFNPREC KLSKQEGQNY GFFLRIEKDT DGHLR**VIEE GSPA**EKAGL  
51 DGDRVLRING VFVDK**EEHAQ VVELVRK**SGN SVTLLVLDGD SYEKAVKNQV  
101 DLKELDQSQR EAALNDK**KPG PGMNGAVEPC AQPR**LCYLVK EGNSFGFSLK  
151 TIQGGK**GVYL TDIMPQGVAM** KAGVLADDHL IEVNGENVEN ASHEEVVEKV  
201 TKSGSRIMFL LVDKETARCH SEQKTQFKR**E TASLKLPHQ PR**VVVIKKG  
251 NGYGFYLRAG PEQKQGI**KD IEPGSPAEAA GLKNNDLVVA VNGKSVEALD**  
301 **HDGVMIRK GGDQTTLLVL DKEAESIYSL ARFSPLLYCQ SQELPNGSVK**  
351 EGPAPIPAPL EATGSEPTED AEGHKPKLCR **LLKEDDSYGF HLN**AIRGQPG  
401 SFVKEVQQGG PADKAGLENE DVIIENVGEN VQEEPYDRVV ERIKSSGKHV  
451 TLLVCGKMAY SYFQAKKIPI VSSMAEPLVA GPDEK**GETSA ESEHDAHPAK**  
501 **DRTLSTASHS SSNSEDEM**

| Start - End | Observed  | Mr(expt)  | Mr(calc)  | Delta   | Miss | Sequence                                           |
|-------------|-----------|-----------|-----------|---------|------|----------------------------------------------------|
| 37 - 46     | 1058.5238 | 1057.5165 | 1057.5291 | -0.0126 | 0    | R.VIEEGSPA <b>EK.A</b>                             |
| 66 - 77     | 1436.7830 | 1435.7757 | 1435.7783 | -0.0026 | 1    | K.EEHAQ <b>VVELVRK.S</b>                           |
| 118 - 134   | 1781.7338 | 1780.7265 | 1780.8349 | -0.1083 | 0    | K.KPGPGMNGAVE <b>PCAQPR.L</b> Oxidation (M)        |
| 157 - 171   | 1638.8008 | 1637.7935 | 1637.8157 | -0.0222 | 0    | K.GVY <b>LT</b> DIMPQGV <b>AMK.A</b> Oxidation (M) |
| 230 - 242   | 1489.8829 | 1488.8756 | 1488.8412 | 0.0344  | 1    | R.ETAS <b>LKLPHQPR.V</b>                           |
| 270 - 283   | 1354.5294 | 1353.5221 | 1353.6776 | -0.1555 | 0    | K.DIEPG <b>SPAEAGLK.N</b>                          |
| 284 - 294   | 1142.5112 | 1141.5039 | 1141.6091 | -0.1052 | 0    | K.NNDLV <b>AVNGK.S</b>                             |
| 295 - 309   | 1669.7921 | 1668.7848 | 1668.8141 | -0.0293 | 0    | K.SVEALD <b>H</b> GD <b>VMIRK.K</b>                |
| 295 - 310   | 1813.7297 | 1812.7224 | 1812.9040 | -0.1816 | 1    | K.SVEALD <b>H</b> GD <b>VMIRK.G</b> Oxidation (M)  |
| 311 - 332   | 2379.2996 | 2378.2923 | 2378.2329 | 0.0594  | 1    | K.GGDQTTLLVLD <b>K</b> E <b>AESIYSLAR.F</b>        |
| 333 - 350   | 2066.8875 | 2065.8802 | 2066.0143 | -0.1340 | 0    | R.FSP <b>LLYCQSQELPNGSVK.E</b>                     |
| 381 - 396   | 1890.8254 | 1889.8181 | 1889.9635 | -0.1454 | 1    | R.L <b>L</b> KEDDSYGF <b>HLNAIR.G</b>              |
| 486 - 500   | 1565.8098 | 1564.8025 | 1564.6754 | 0.1272  | 0    | K.G <b>ETSAE</b> SE <b>HDAHPAK.D</b>               |
| 501 - 519   | 2054.8943 | 2053.8870 | 2053.8494 | 0.0376  | 1    | K.D <b>RTLSTASHSSNSEDEM.-</b>                      |

No match to: 901.1133, 908.5714, 911.6043, 914.6609, 917.3698, 924.6140, 927.6000, 931.5827, 937.6345, 940.5879, 948.5957, 951.5875, 959.5490, 968.5900, 973.5757, 982.6072, 985.5664, 993.5540, 996.6175, 1001.5570, 1016.5516, 1030.5267, 1034.1300, 1043.8966, 1045.5582, 1052.0945, 1066.0375, 1072.0677, 1082.0199, 1084.4696, 1088.5137, 1106.4690, 1112.4712, 1118.5055, 1126.4746, 1134.4730, 1148.5146, 1151.6165, 1159.4895, 1165.6309, 1174.4861, 1179.4952, 1189.4838, 1200.5272, 1211.4911, 1217.4574, 1233.4437, 1242.5450, 1254.9388, 1260.9667, 1276.9247, 1277.5347, 1287.5168, 1292.8881, 1302.5234, 1307.4839, 1314.5333, 1320.3954, 1329.4270, 1336.4691, 1339.5406, 1346.5065, 1363.4391, 1379.4639, 1383.4745, 1399.5435, 1410.6777, 1421.6036, 1434.7448, 1443.7487, 1458.7814, 1464.8152, 1469.8550, 1475.7842, 1487.8605, 1497.7684, 1501.7800, 1507.8585, 1515.7827, 1523.8030, 1529.8016, 1531.8464, 1546.8104, 1549.8423, 1562.8223, 1571.7916, 1578.8167, 1587.7784, 1593.7736, 1595.7474, 1604.8442, 1617.7399, 1634.8563, 1650.7681, 1656.8196, 1660.7979, 1676.8202, 1684.8226, 1696.7927, 1699.7695, 1708.6592, 1716.7589,



1724.8221, 1739.7468, 1747.8027, 1757.7690, 1765.6450, 1791.6324, 1794.7020, 1804.7986, 1821.7797, 1837.8213, 1845.8403, 1851.8081, 1859.7900, 1867.8126, 1875.8020, 1880.7917, 1904.9146, 1922.8225, 1940.8094, 1950.8409, 1963.8607, 1978.8130, 1986.9221, 1993.8553, 2007.8785, 2015.8541, 2022.8866, 2035.8585, 2038.8789, 2046.8862, 2082.8784, 2095.9011, 2111.9150, 2136.0010, 2149.9702, 2167.0027, 2170.9412, 2184.0090, 2193.9878, 2202.9524, 2208.9883, 2225.0256, 2234.0066, 2248.9976, 2263.0522, 2265.0510, 2276.0105, 2280.0706, 2283.0940, 2297.1086, 2299.0981, 2308.0706, 2314.0771, 2323.0923, 2343.0044, 2349.1423, 2365.2517, 2383.9211, 2400.1213, 2420.1860, 2447.1692, 2457.1440, 2462.2073, 2482.1704, 2487.1838, 2501.2422, 2509.1665, 2526.1855, 2538.2385, 2548.1907, 2565.2693, 2584.2773, 2609.3159, 2636.3223, 2652.3376, 2663.3923, 2680.4529, 2705.3123, 2720.4355, 2780.6343, 2807.5339, 2872.6697, 2902.7170, 2932.8469

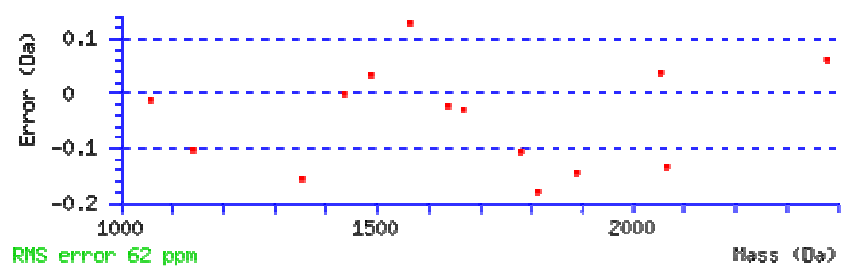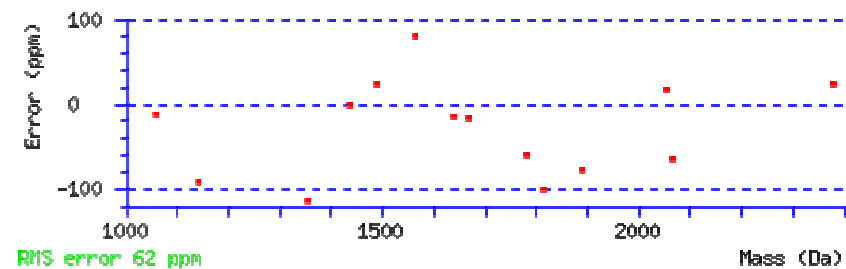

### 35 ATP synthase subunit beta, mitochondrial

Number of mass values searched: 150

Number of mass values matched: 11

Sequence Coverage: 33%

Matched peptides shown in **Bold Red**

1 MLSLVGRVAS ASASGALR**GL SPSAALPQAQ LLLRAAPAGV** HPARDYAAQA  
51 SAAPKAGTAT GRIVAVIGAV VDVQFDEGLP PILNALEVQG RDSR**LVLEVA**  
101 **QHLGESTVRT** IAMDGTEGLV RGQKVLDSGA PIK**IPVGPET LGRIMNVIGE**  
151 **PIDER**GPIKT KQFAPIHAEA PEFIEMSVEQ EILVTGIKVV DLLAPYAKGG  
201 KIGLFGGAGV GKTVLIMELI NNVAK**AHGGY SVFAGVGERT REGNDLYHEM**  
251 **IESGVINLKD** ATSK**VALVYG QMNEPPGARA** RVALTGLTVA EYFR**DQEGQD**  
301 **VLLFIDNIFR** FTQAGSEVSA LLGR**IPSAVG YQPTLATDMG TMQER**ITTTK  
351 KGSITSVQAI YVPADDLTDP APATTF AHL D ATT VLSR**AIA ELGIYPAVDP**  
401 **LDSTSR**IMDP NIVGNEHYDV ARGVQKILQD YKSLQDIIAI LGMDELSEED  
451 KLT VSRARKI QR**FLSQPFQV AEVFTGHMGK** LVPLKETIKG FQQILAGEYD  
501 HLPEQAFYMV GPIEEAVAKA DKLAEEHGS

| Start - End | Observed  | Mr(expt)  | Mr(calc)  | Delta   | Miss | Sequence                                  |
|-------------|-----------|-----------|-----------|---------|------|-------------------------------------------|
| 19 - 34     | 1634.8357 | 1633.8284 | 1633.9515 | -0.1231 | 0    | R.GLSPSAALPQAQLLLR.A                      |
| 95 - 109    | 1650.8141 | 1649.8068 | 1649.9101 | -0.1032 | 0    | R.LVLEVAQHLGESTVR.T                       |
| 134 - 155   | 2421.1833 | 2420.1760 | 2420.2733 | -0.0973 | 1    | K.IPVGPETLGRIMNVIGEPIDER.G Oxidation (M)  |
| 226 - 239   | 1406.5579 | 1405.5506 | 1405.6739 | -0.1232 | 0    | K.AHGGYSVFAGVGER.T                        |
| 240 - 259   | 2318.0742 | 2317.0669 | 2317.1372 | -0.0703 | 1    | R.TREGNDLYHEMIESGVINLK.D                  |
| 265 - 279   | 1601.7722 | 1600.7649 | 1600.8031 | -0.0382 | 0    | K.VALVYGMNEPPGAR.A                        |
| 295 - 310   | 1921.8376 | 1920.8303 | 1920.9581 | -0.1278 | 0    | R.DQEGQDVLLFIDNIFR.F                      |
| 325 - 345   | 2282.1040 | 2281.0967 | 2281.0719 | 0.0249  | 0    | R.IPSAVGYQPTLATDMGMTQER.I Oxidation (M)   |
| 325 - 345   | 2298.0967 | 2297.0894 | 2297.0668 | 0.0226  | 0    | R.IPSAVGYQPTLATDMGMTQER.I 2 Oxidation (M) |
| 388 - 406   | 1987.9125 | 1986.9052 | 1987.0262 | -0.1210 | 0    | R.AIAELGIYPAVDPLDSTSR.I                   |
| 463 - 480   | 2022.8986 | 2021.8913 | 2022.0033 | -0.1120 | 0    | R.FLSQPFQVAEVFTGHMGK.L                    |

No match to: 905.5524, 909.0894, 915.1031, 925.5801, 931.5819, 939.5709, 948.4821, 954.6133, 960.6180, 973.5735, 985.5571, 996.6111, 1000.5480, 1002.5652, 1014.5712, 1029.5225, 1031.5259, 1034.1268, 1044.5376, 1052.0890, 1058.5208, 1066.0096, 1074.4983, 1082.0135, 1089.4995, 1106.4757, 1109.4434, 1118.4940, 1125.4548, 1132.4777, 1143.5135, 1165.4762, 1174.4806, 1179.4897, 1191.4697, 1200.5283, 1218.4364, 1233.4614, 1235.4031, 1242.5333, 1263.4973, 1277.5243, 1300.3578, 1307.4760, 1320.3859, 1328.4631, 1339.5280, 1350.4561, 1358.4130, 1365.4192, 1383.4673, 1391.5226, 1423.5934, 1434.7347, 1436.7789, 1450.7068, 1469.8627, 1475.7740, 1483.7499, 1487.8717, 1489.8762, 1497.7628, 1507.8621, 1523.7787, 1531.8411, 1545.8042, 1549.8362, 1555.8220, 1564.7980, 1571.7869, 1578.8306, 1584.6708, 1593.7664, 1604.8384, 1612.7389, 1620.7694, 1638.7903, 1660.7782, 1679.8124, 1699.7484, 1707.6727, 1716.7605, 1734.7041, 1741.6962, 1750.7225, 1765.6384, 1780.6930, 1791.6174, 1816.7386, 1837.8207, 1851.8060, 1867.7982, 1890.8240, 1929.7091, 1940.8241, 1948.7979, 1965.9093, 1978.8303, 1993.8577, 2050.8840, 2064.8962, 2082.8547, 2094.8911, 2104.9048, 2121.9126, 2135.9971, 2149.9783, 2166.9819, 2184.0085, 2193.9834, 2225.0364, 2234.0144, 2248.9980, 2265.0500, 2284.0964, 2307.0823, 2328.0933, 2342.9661, 2367.1956, 2383.9102, 2399.0439, 2446.1865, 2448.1697, 2477.0652, 2487.1860, 2501.2566, 2510.1638, 2525.1787, 2565.2822, 2584.2910, 2608.3103, 2637.3621, 2647.3782, 2705.3274, 2717.2468, 2746.5898, 2779.6494, 2872.6831, 2932.8726

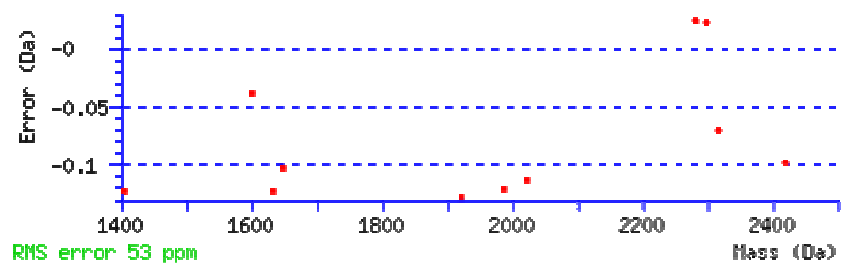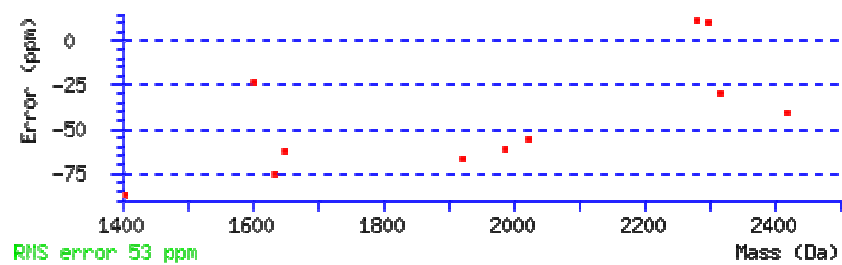

**36 Actin, cytoplasmic 2**

Number of mass values searched: **100**

Number of mass values matched: **11**

Sequence Coverage: **35%**

Matched peptides shown in **Bold Red**

**1 MEEEIALVI DNGSGMCKAG FAGDDAPRAV FPSIVGRPRH QGVMVGMGQK**

**51 DSYVGDEAQS KR**GILTLKYP IEHGIVTNWD DMEKI**IWHHTF YNELRVAPEE**

**101 HPVLLTEAPL NPK**ANREKMT QIMFETFNTP AMYVAIQAVL SLYASGRRTTG

**151 IVMDSGDGVT HTVPIYEGYA LPHAILRLDL AGRDLTDYLM KILTER****GYSF**

**201 TTTAEREIVR DIKEKLCYVA LDFEQEMATA ASSSSLEK****SY ELPDGGQVITI**

**251 GNER**FRCPEA LFQPSFLGME SCGIHETTFN SIMK**CDVDIR** KDLYANTVLS

**301 GGTTMYPGIA DRMQKEITAL APSTMKIKI****II APPERK**YSVW IGGASILASLS

**351 TFQQMWISKQ EYDESGPSIV HRKCF**

**Start - End Observed Mr(expt) Mr(calc) Delta Miss Sequence**

**1 - 18 1966.9277 1965.9204 1965.8846 0.0359 0 -.MEEEIALVIDNNGSGMCK.A**

**2 - 18 1851.8008 1850.7935 1850.8390 -0.0455 0 M.EEEIALVIDNNGSGMCK.A** Oxidation (M)

**19 - 28 976.5035 975.4962 975.4410 0.0552 0 K.AGFAGDDAPR.A**

**29 - 50 2367.1882 2366.1809 2366.2464 -0.0655 1 R.AVFPSIVGRPRHQGVMVGMGQK.D** Oxidation (M)

**51 - 62 1354.4746 1353.4673 1353.6161 -0.1487 1 K.DSYVGDEAQSQR.G**

**85 - 95 1515.7522 1514.7449 1514.7419 0.0031 0 K.IWHHTFYNELR.V**

**96 - 113 1953.9238 1952.9165 1953.0571 -0.1406 0 R.VAPEEHPVLLTEAPLNPK.A**

**197 - 206 1132.4652 1131.4579 1131.5197 -0.0617 0 R.GYSFTTTAER.E**

**239 - 254 1790.7531 1789.7458 1789.8846 -0.1388 0 K.SYELPDGGQVITIGNER.F**

**285 - 291 905.5710 904.5637 904.4436 0.1201 1 K.CDVDIRK.D**

**329 - 336 923.5768 922.5695 922.5600 0.0096 1 K.IIAPPERK.Y**

No match to: 917.3767, 931.5898, 945.6192, 985.5609, 1002.5698, 1031.5394, 1037.5315, 1058.5272, 1066.0588, 1074.5096, 1089.5066, 1106.4851, 1109.4447, 1118.4989, 1140.4943, 1146.4983, 1165.5144, 1179.4995, 1193.4938, 1233.4679, 1265.4828, 1277.5339, 1300.3643, 1307.4846, 1320.3923, 1339.5159, 1365.4257, 1383.4674, 1436.7675, 1458.7489, 1469.8444, 1475.7804, 1489.8773, 1499.7246, 1507.8542, 1530.7775, 1549.8347, 1555.8295, 1572.7610, 1585.7434, 1604.8217, 1638.7875, 1650.7477, 1657.7257, 1668.7687, 1699.7355, 1707.6758, 1716.7515, 1750.7168, 1765.6458, 1780.7003, 1804.7816, 1818.7646, 1837.8140, 1890.8258, 1940.8079, 1976.8044, 1993.8456, 2022.8876, 2046.9150, 2063.8982, 2082.8555, 2135.9780, 2149.9624, 2166.9753, 2170.9097, 2183.9902, 2193.9617, 2225.0110, 2239.0396, 2264.0432, 2282.0830, 2284.0752, 2298.0876, 2307.0574, 2329.0823, 2342.9634, 2353.1187, 2383.9272, 2399.0388, 2421.1665, 2448.1484, 2487.1716, 2501.2319, 2510.1465, 2565.2461, 2705.2925, 2872.6494, 2902.6919

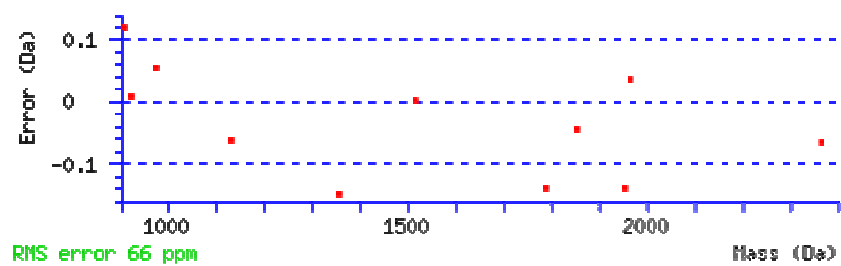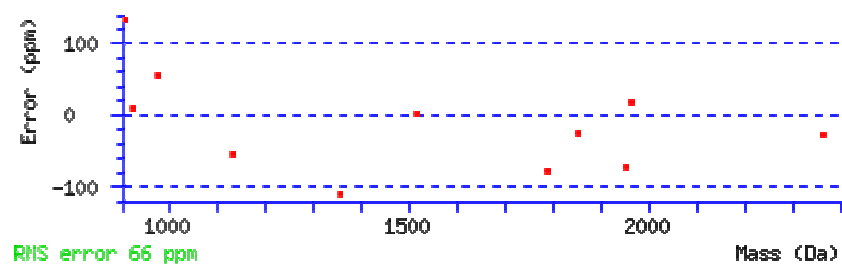

### 37 Actin, cytoplasmic 2

Number of mass values searched: 100

Number of mass values matched: 13

Sequence Coverage: 45%

Matched peptides shown in **Bold Red**

**1 MEEEIALVI DNGSGMCKAG FAGDDAPRAV FPSIVGRPRH QGVMVGMGQK**

**51 DSYVGDEAQS KRGILTLKYP IEHGIVTNWD DMEKIWHHTF YNELRVAPEE**

**101 HPVLLTEAPL NPKANREKMT QIMFETFNTF AMYVAIQAVL SLYASGRRTG**

**151 IVMDSGDGVT HTVPIYEGYA LPHAILRLDL AGRDLTDYLM KILTERGYSF**

**201 TTTAEREIVR DIKEKLCYVA LDFAQEMATA ASSSSLEKSY ELPDQGVITI**

**251 GNERFRCPEA LFQPSFLGME SCGIHETTFN SIMKCDVDIR KDLYANTVLS**

**301 GGTTMYPGIA DRMQKEITAL APSTMKIKII APPERKYSVW IGGSSILASLS**

**351 TFQMWISKQ EYDESGPSIV HRKCF**

**Start - End Observed Mr(expt) Mr(calc) Delta Miss Sequence**

**2 - 18 1851.8005 1850.7932 1850.8390 -0.0458 0 M.EEEEIALVIDNNGSGMCK.A Oxidation (M)**

**19 - 28 976.4955 975.4882 975.4410 0.0472 0 K.AGFAGDDAPR.A**

**29 - 50 2367.1956 2366.1883 2366.2464 -0.0581 1 R.AVFPSIVGRPRHQGVMVGMGQK.D Oxidation (M)**

**51 - 61 1198.5729 1197.5656 1197.5150 0.0507 0 K.DSYVGDEAQS.R**

**85 - 95 1515.7509 1514.7436 1514.7419 0.0018 0 K.IWHHTFYNELR.V**

**96 - 113 1953.9336 1952.9263 1953.0571 -0.1308 0 R.VAPEEHPVLLTEAPLNPK.A**

**197 - 206 1132.4548 1131.4475 1131.5197 -0.0721 0 R.GYSFTTTAER.E**

**197 - 210 1629.7585 1628.7512 1628.8158 -0.0646 1 R.GYSFTTTAEREIVR.D**

**239 - 254 1790.7743 1789.7670 1789.8846 -0.1176 0 K.SYELPDQGVITIGNER.F**

**291 - 312 2343.0542 2342.0469 2342.1576 -0.1107 1 R.KDLYANTVLSGGTTMYPGIADR.M**

**329 - 336 923.5739 922.5666 922.5600 0.0067 1 K.IIAPPERK.Y**

**336 - 359 2730.4917 2729.4844 2729.4251 0.0593 1 R.KYSVWIGGSILASLSTFQMWISK.Q**

**336 - 359 2746.5398 2745.5325 2745.4200 0.1125 1 R.KYSVWIGGSILASLSTFQMWISK.Q Oxidation (M)**

No match to: 917.3724, 939.5619, 945.6207, 985.5630, 1002.5779, 1031.5399, 1034.1315, 1052.0922, 1058.5299, 1066.0375, 1082.0219, 1089.5099, 1106.4863, 1118.5023, 1146.4673, 1173.4857, 1179.5001, 1191.4811, 1233.4624, 1277.5342, 1307.4811, 1339.5308, 1354.4152, 1383.4702, 1436.7849, 1469.8282, 1475.7855, 1489.8884, 1499.7125, 1507.8599, 1522.7866, 1530.7708, 1541.7664, 1549.8402, 1555.8234, 1567.7527, 1570.7733, 1572.7539, 1585.7472, 1593.7589, 1604.8262, 1638.7769, 1657.7314, 1667.7871, 1699.7456, 1707.6962, 1716.7518, 1750.7144, 1763.6980, 1766.6692, 1780.6940, 1798.7358, 1804.7903, 1818.7875, 1837.8248, 1940.8059, 1961.7987, 1976.7983, 1993.8580, 2010.9443, 2024.9524, 2063.9082, 2124.9839, 2166.9883, 2193.9822, 2211.0081, 2225.0281, 2233.9985, 2248.9839, 2258.0037, 2263.0542, 2281.0789, 2283.0979, 2297.1096, 2312.0527, 2336.1304, 2353.1643, 2383.9463, 2400.1440, 2421.1865, 2448.1748, 2487.1909, 2503.1958, 2510.1772, 2565.2488, 2705.3325, 2779.6531

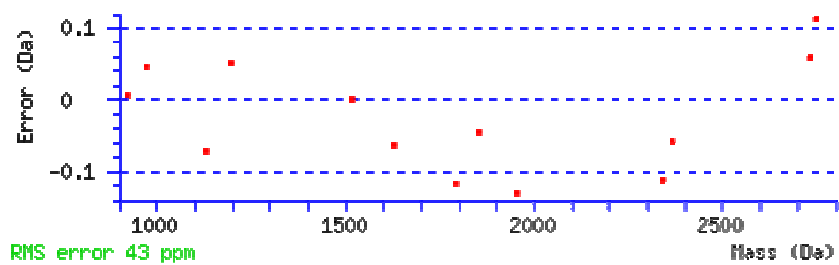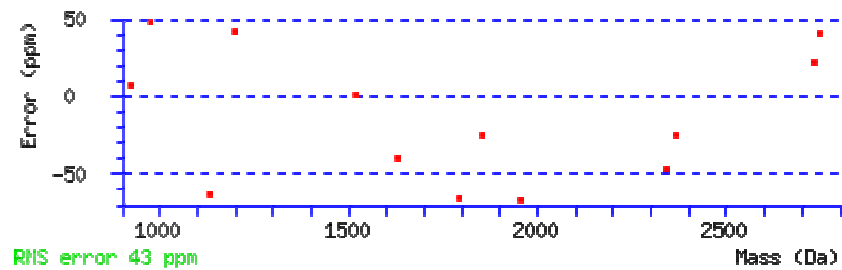

**38 Actin, cytoplasmic 2**

Number of mass values searched: **250**

Number of mass values matched: **15**

Sequence Coverage: **46%**

Matched peptides shown in **Bold Red**

**1 MEEEEIALVI DNGSGMCKAG FAGDDAPRAV FPSIVGRPRH QGVMVGMGQK**

**51 DSYVGDEAQS KRGILTLKYP IEHGIVTNWD DMEKIWHHTF YNELRVAPEE**

**101 HPVLLTEAPL NPKANREKMT QIMFETFNTP AMYVAIQAVL SLYASGRRTTG**

**151 IVMDSGDGVT HTVPIYEGYA LPHAILRLDL AGRDLTDYLM KILTERGYSF**

**201 TTTAEREIVR DIKEKLCYVA LDFEQEMATA ASSSSLEKSY ELPDQGVITI**

**251 GNERFRCPEA LFQPSFLGME SCGIHETTFN SIMKCDVDIRK KDLYANTVLS**

**301 GGTTMYPGIA DRMQKEITAL APSTMKIKII APPERKYSVW IGGSSILASLS**

**351 TFQQMWISKQ EYDESGPSIV HRKCF**

**Start - End Observed Mr(expt) Mr(calc) Delta Miss Sequence**

**2 - 18 1851.7750 1850.7677 1850.8390 -0.0713 0 M.EEEEIALVIDNNGSGMCK.A Oxidation (M)**

**19 - 28 976.5033 975.4960 975.4410 0.0550 0 K.AGFAGDDAPR.A**

**29 - 50 2367.1863 2366.1790 2366.2464 -0.0674 1 R.AVFPSIVGRPRHQGVMVGMGQK.D Oxidation (M)**

**40 - 50 1171.4414 1170.4341 1170.5638 -0.1297 0 R.HQGMVGMGQK.D**

**51 - 61 1198.5778 1197.5705 1197.5150 0.0556 0 K.DSYVGDEAQS.R**

**85 - 95 1515.7467 1514.7394 1514.7419 -0.0024 0 K.IWHHTFYNELR.V**

**96 - 113 1953.9526 1952.9453 1953.0571 -0.1118 0 R.VAPEEHPVLLTEAPLNPK.A**

**197 - 206 1132.4542 1131.4469 1131.5197 -0.0727 0 R.GYSFTTTAER.E**

**216 - 238 2566.2676 2565.2603 2565.1614 0.0989 0 K.LCYVALDFEQEMATAASSSSLEK.S Oxidation (M)**

**239 - 254 1790.7737 1789.7664 1789.8846 -0.1182 0 K.SYELPDQGVITIGNER.F**

**285 - 291 905.5814 904.5741 904.4436 0.1305 1 K.CDVDIRK.D**

**329 - 336 923.4128 922.4055 922.5600 -0.1544 1 K.IIAPPERK.Y**

**336 - 359 2730.5300 2729.5227 2729.4251 0.0976 1 R.KYSVWIGGSILASLSTFQQMWISK.Q**

**336 - 359 2746.5745 2745.5672 2745.4200 0.1472 1 R.KYSVWIGGSILASLSTFQQMWISK.Q Oxidation (M)**

**337 - 359 2602.3499 2601.3426 2601.3301 0.0125 0 K.YSVWIGGSILASLSTFQQMWISK.Q**

No match to: 909.0821, 910.6542, 916.2701, 917.3735, 929.5222, 931.5948, 937.5298, 939.2963, 945.6109, 951.5923, 957.6073, 959.3074, 965.5639, 971.5142, 972.6075, 982.5092, 985.5591, 991.5764, 994.5756, 996.6179, 1001.5535, 1010.5839, 1016.5480, 1028.1166, 1031.5308, 1034.1249, 1044.0757, 1052.0887, 1058.5199, 1066.0531, 1072.0603, 1082.0171, 1087.5267, 1089.4939, 1097.9817, 1103.9908, 1108.4274, 1116.5415, 1118.4916, 1125.9559, 1126.4990, 1128.4121, 1140.5013, 1142.4966, 1146.4915, 1158.4742, 1163.4899, 1173.5012, 1179.4994, 1189.4633, 1207.5148, 1218.4438, 1228.5490, 1233.4381, 1239.9861, 1246.9977, 1253.4203, 1254.9530, 1260.9611, 1267.5177, 1272.5388, 1276.9276, 1283.5468, 1290.5457, 1292.8822, 1300.6512, 1301.5519, 1307.4801, 1314.6180, 1321.3818, 1329.4819, 1339.5326, 1346.6118, 1349.4121, 1353.6548, 1360.5272, 1365.4242, 1374.4862, 1382.4597, 1384.6104, 1391.5685, 1395.5759, 1404.6809, 1414.6301, 1421.7035, 1436.7958, 1443.7649, 1456.7340, 1470.8674, 1475.7909, 1482.8859, 1487.8823, 1489.8833, 1496.9457, 1499.7031, 1507.8585, 1514.7083, 1522.8020, 1528.7544, 1530.7850, 1541.8000, 1546.8113, 1549.8422, 1555.8303, 1562.8384, 1567.7527, 1571.7878, 1578.8257, 1585.7603, 1586.7407, 1593.7584, 1600.7808, 1604.8536, 1621.8190, 1625.8265, 1634.8451, 1638.7969, 1648.7847, 1655.7625, 1656.7556, 1660.7909, 1668.7802, 1678.0001, 1680.8325, 1692.9631, 1698.7975, 1707.6564, 1716.7670, 1725.0187, 1727.8434, 1735.6885, 1745.7808, 1748.7275, 1757.6740, 1762.7794, 1764.6646, 1766.6793, 1774.7275, 1780.7104, 1798.7155, 1804.7957, 1813.7621, 1818.7836, 1827.7788, 1833.7671, 1845.8954, 1861.8674, 1879.7516, 1881.6776, 1893.7699, 1902.9071, 1911.7754, 1920.8662,



1931.8037, 1940.7826, 1949.7595, 1961.8171, 1967.9729, 1975.8000, 1981.9543, 1990.8215, 1993.8535, 2005.8661, 2014.0667, 2022.9130, 2031.8695, 2046.8937, 2050.9282, 2059.9458, 2064.8601, 2073.9636, 2092.9763, 2106.9063, 2126.0027, 2141.9375, 2149.9966, 2168.0037, 2193.9941, 2206.0735, 2222.0403, 2225.0420, 2234.0034, 2245.0117, 2248.9875, 2258.0112, 2263.0417, 2265.0530, 2279.0862, 2282.0947, 2284.0986, 2298.1123, 2307.0996, 2319.0984, 2322.0830, 2336.1248, 2345.1277, 2354.1375, 2383.9250, 2394.1245, 2400.1650, 2418.1692, 2421.1926, 2431.1243, 2446.1794, 2448.1731, 2457.2617, 2461.0513, 2473.0151, 2481.1697, 2487.1907, 2503.1929, 2512.2229, 2524.2000, 2536.2559, 2545.2622, 2579.3738, 2583.2068, 2592.2300, 2607.2407, 2610.3372, 2626.3176, 2636.3357, 2652.3982, 2679.4387, 2689.4709, 2705.3220, 2720.4531, 2737.5232, 2772.5203, 2778.1143, 2780.6287, 2807.5474, 2871.6504, 2914.8303, 3033.9370

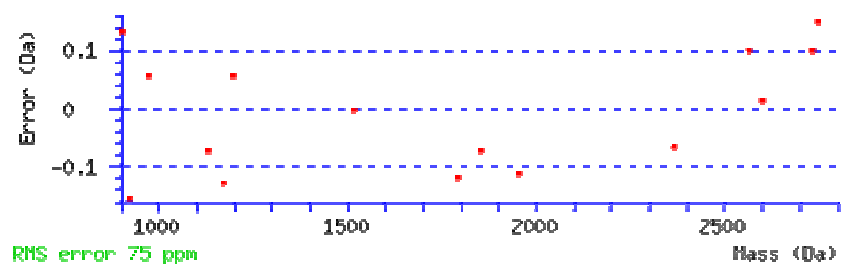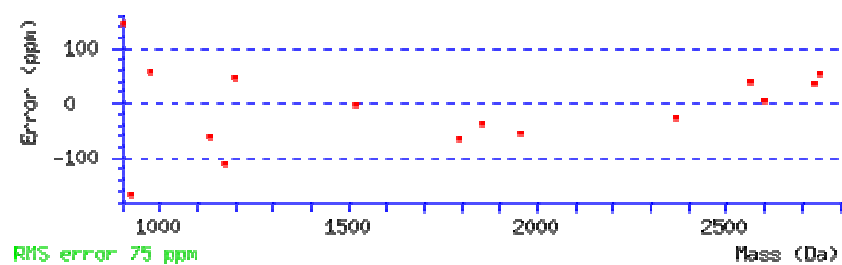

#### 40 Homer protein homolog 1

Number of mass values searched: 200

Number of mass values matched: 11

Sequence Coverage: 31%

Matched peptides shown in **Bold Red**

**1 MGEQPIFSTR** AHVFQIDPNT **KKNWVPTSKH** AVTVSYFYDS TRNVYRIISI  
**51 DGSKAIINST ITPNMTFTKT** SQKFGQWADS RANTVYGLGF SSEHLSKFA  
**101 EKQEFKEAA** RLAKEKSQEK MELTSTPSQE SAGGDLQSPL TPESINGTDD  
**151 ERTPDVTQNS EPRAEPTQNA** LPFPHSAGDR TQALSHASSA ISKHWEAELA  
**201 TLKGNNAKLT** AALLESTANV KQWKQQLAAY QEEAERLHKR VTELECVSSQ  
**251 ANAVHSHKTE LNQTVQELEE TLKVKEEIE** RLKQEIDNAR ELQEQRDSL  
**301** QKLQEVEIRN KDLEGQLSDL EQRLEK**SQNE QEAFRSNLKT LLEILDGKIF**  
**351 ELTELRDNLAKLLECS**

| Start - End | Observed | Mr(expt) | Mr(calc) | Delta | Miss | Sequence |
|-------------|----------|----------|----------|-------|------|----------|
|-------------|----------|----------|----------|-------|------|----------|

|                  |                  |                  |                  |                |          |                                                  |
|------------------|------------------|------------------|------------------|----------------|----------|--------------------------------------------------|
| <b>1 - 10</b>    | <b>1165.4011</b> | <b>1164.3938</b> | <b>1164.5597</b> | <b>-0.1659</b> | <b>0</b> | <b>-.MGEQPIFSTR.A</b>                            |
| <b>22 - 29</b>   | <b>959.5496</b>  | <b>958.5423</b>  | <b>958.5236</b>  | <b>0.0187</b>  | <b>1</b> | <b>K.KNWVPTSK.H</b>                              |
| <b>47 - 69</b>   | <b>2481.1843</b> | <b>2480.1770</b> | <b>2480.3196</b> | <b>-0.1426</b> | <b>1</b> | <b>R.IISLDGSKAIINSTITPNMTFTK.T</b> Oxidation (M) |
| <b>55 - 69</b>   | <b>1667.7024</b> | <b>1666.6951</b> | <b>1666.8600</b> | <b>-0.1649</b> | <b>0</b> | <b>K.AIINSTITPNMTFTK.T</b> Oxidation (M)         |
| <b>99 - 107</b>  | <b>1173.4816</b> | <b>1172.4743</b> | <b>1172.5866</b> | <b>-0.1123</b> | <b>1</b> | <b>K.FAEKFQEFK.E</b>                             |
| <b>153 - 163</b> | <b>1243.4626</b> | <b>1242.4553</b> | <b>1242.5840</b> | <b>-0.1287</b> | <b>0</b> | <b>R.TPDVTQNSEPR.A</b>                           |
| <b>259 - 275</b> | <b>2002.1631</b> | <b>2001.1558</b> | <b>2001.0630</b> | <b>0.0929</b>  | <b>1</b> | <b>K.TELNQTVQELETLVK.E</b>                       |
| <b>274 - 281</b> | <b>1031.5356</b> | <b>1030.5283</b> | <b>1030.5294</b> | <b>-0.0011</b> | <b>1</b> | <b>K.VKEEIEER.L</b>                              |
| <b>327 - 335</b> | <b>1108.4028</b> | <b>1107.3955</b> | <b>1107.4945</b> | <b>-0.0990</b> | <b>0</b> | <b>K.SQNEQEAFR.S</b>                             |
| <b>336 - 348</b> | <b>1443.6589</b> | <b>1442.6516</b> | <b>1442.8344</b> | <b>-0.1828</b> | <b>1</b> | <b>R.SNLKTLLEILDGK.I</b>                         |
| <b>357 - 366</b> | <b>1162.4303</b> | <b>1161.4230</b> | <b>1161.5699</b> | <b>-0.1469</b> | <b>1</b> | <b>R.DNLAKLLECS.-</b>                            |

No match to: 906.4255, 909.6912, 914.5380, 915.4563, 917.3764, 923.4292, 929.4879, 935.4080, 937.4569, 943.4514, 945.4741, 951.6177, 953.4241, 961.4928, 965.4255, 971.4565, 973.4288, 979.4825, 981.3292, 983.3121, 985.5522, 991.5208, 998.5462, 1000.5458, 1002.5754, 1028.1401, 1029.4717, 1034.1382, 1044.5061, 1052.0936, 1058.5127, 1066.0704, 1072.0792, 1078.0973, 1082.0511, 1087.4760, 1089.5009, 1097.4445, 1103.4304, 1106.4036, 1115.3981, 1118.4731, 1124.6138, 1127.4144, 1133.7928, 1137.3867, 1143.4734, 1145.5040, 1151.3828, 1155.3872, 1170.3855, 1180.4641, 1188.4210, 1201.3770, 1211.5817, 1215.3864, 1227.6379, 1233.4476, 1241.3517, 1245.3722, 1252.0648, 1255.9707, 1259.3484, 1260.9761, 1269.3546, 1276.9535, 1283.9985, 1289.3931, 1298.5863, 1303.3835, 1310.1569, 1313.3763, 1320.3845, 1323.3357, 1331.3698, 1337.3959, 1339.5526, 1348.3033, 1352.3591, 1354.3707, 1361.3945, 1373.3365, 1396.3954, 1401.4586, 1417.5079, 1432.5869, 1436.7709, 1465.8981, 1475.7159, 1485.7115, 1487.8739, 1489.8846, 1496.7755, 1507.8544, 1522.8965, 1527.7855, 1531.8328, 1542.3137, 1546.7966, 1549.8424, 1555.8386, 1565.8577, 1571.7878, 1577.8152, 1589.6711, 1593.7634, 1594.7744, 1601.7302, 1604.8314, 1612.7251, 1624.7484, 1632.7386, 1634.8917, 1653.8625, 1659.7838, 1672.7273, 1688.7031, 1705.7791, 1722.9015, 1735.0825, 1744.9111, 1752.6837, 1754.4170, 1764.7042, 1766.6537, 1781.7202, 1790.7954, 1794.7095, 1812.6934, 1822.1083, 1837.0391, 1882.7268, 1900.5093, 1905.6818, 1922.7371, 1935.7794, 1945.9263, 1960.2281, 1962.7723, 1976.8082, 1987.2444, 1993.8463, 2011.8602, 2022.3103, 2058.8860, 2067.9390, 2086.1626, 2096.8123, 2112.8582, 2123.2378, 2144.6570, 2172.1929, 2194.6516, 2211.0249, 2225.0461, 2234.0349, 2243.9182, 2254.9937, 2267.0002, 2277.0537, 2283.1238, 2298.0876, 2308.0491, 2317.0415, 2320.9531, 2383.0847, 2421.1831, 2446.1741, 2448.1626, 2457.6357, 2461.3403, 2476.2759, 2487.2253, 2503.2405, 2509.2708, 2522.3359, 2526.1421, 2530.1609, 2592.2202, 2609.4373, 2636.3459, 2652.4016, 2707.4927, 2727.5007, 2738.5481, 2767.1729, 2777.5054, 2970.8933, 3009.3359

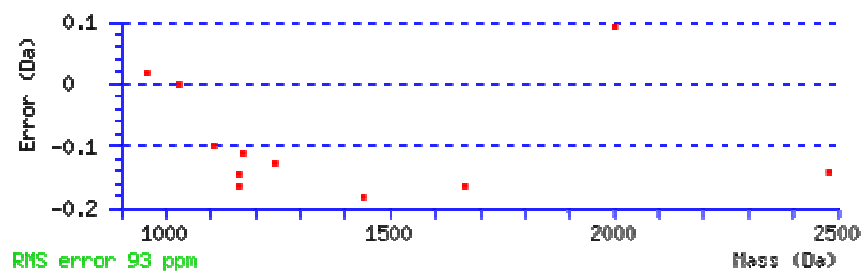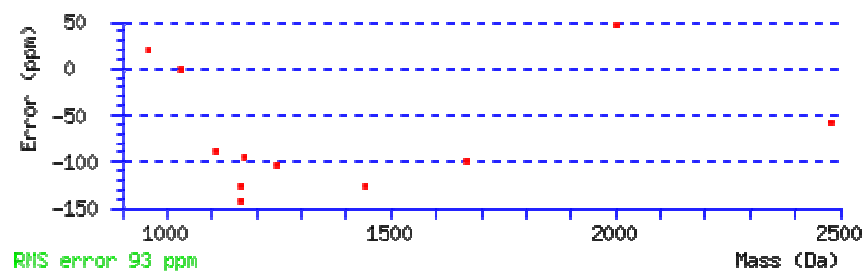

#### 42 Guanine nucleotide-binding protein subunit alpha-11

Number of mass values searched: 100

Number of mass values matched: 8

Sequence Coverage: 30%

Matched peptides shown in **Bold Red**

**1** MTLESMMACC LSDEVKESKR INAEIEKQLR RDKRDARREL KLLLLGTGE  
**51** GKSTFIKQMR IIHGAGYSEE DKRGFTKLVY QNIFTAMQAM VRAMETLKIL  
**101** **YK**YEQNKANA LLIREVDVEK **VTTFEHQYVN AIK**TLWSDPG VQECYDRRRE  
**151** **FQLSDSAKYY** LTDVDRIATV GYLPTQQDVL RVRVPTTGII EYPFLENII  
**201** FR**MVDVGGQR SER**RKWIHCF ENVTSIMFLV ALSEYDQVLV ESDNENRMEE  
**251** SKALFR**TIIT YPWFQNSSVI LFLNK**KDLLE DKILHSHLVD YPFEDGPQR  
**301** DAQAAREFIL KMFVDLNPDS DKIIYSHFTC ATDTENIRFV FAAVKDTILQ  
**351** LNLKEYNLV

Start - End Observed Mr(expt) Mr(calc) Delta Miss Sequence

**1 - 19 2248.9844 2247.9771 2247.9554 0.0218 1 -.MTLESMMACCLSDEVKESK.R**  
**20 - 27 972.5868 971.5795 971.5399 0.0396 1 K.RINAEIEK.Q**  
**74 - 92 2234.0093 2233.0020 2233.1388 -0.1367 1 R.GFTKLVYQNIFTAMQAMVR.A** Oxidation (M)  
**93 - 102 1225.5791 1224.5718 1224.6788 -0.1069 1 R.AMETLKILYK.Y** Oxidation (M)  
**121 - 133 1549.8331 1548.8258 1548.7936 0.0322 0 K.VTTFEHQYVNAIK.T**  
**149 - 158 1180.4968 1179.4895 1179.5884 -0.0989 1 R.REFQLSDSAK.Y**  
**203 - 213 1233.4530 1232.4457 1232.5932 -0.1474 1 R.MVDVGGQRSER.R**  
**257 - 275 2284.0840 2283.0767 2283.2303 -0.1536 0 R.TIITYPWFQNSSVILFLNK.K**

No match to: 901.1002, 909.0784, 916.6199, 922.6417, 926.5854, 931.5918, 937.4409, 943.5621, 949.5701, 955.6136, 965.5972, 978.6183, 985.5634, 995.5604, 1001.5566, 1012.5805, 1028.1088, 1034.1279, 1044.0765, 1052.0913, 1058.5186, 1066.0464, 1075.2957, 1081.9929, 1089.4977, 1097.9810, 1106.4757, 1108.4092, 1118.4930, 1131.4819, 1144.5485, 1158.5426, 1165.5137, 1173.4984, 1192.4982, 1199.5544, 1210.4902, 1254.9458, 1263.5159, 1270.9077, 1276.9269, 1284.5320, 1292.9055, 1307.4971, 1320.3859, 1328.4491, 1339.5409, 1346.4941, 1354.4781, 1365.4222, 1383.4656, 1391.5281, 1436.7809, 1475.7814, 1487.8605, 1489.8837, 1496.8008, 1507.8557, 1515.7681, 1531.8473, 1545.8068, 1555.8254, 1562.8234, 1571.7817, 1578.8304, 1587.7695, 1595.7321, 1604.8431, 1634.8281, 1657.7109, 1676.8164, 1699.7513, 1707.6733, 1716.7643, 1766.6589, 1790.7538, 1794.6925, 1838.8010, 1993.8456, 2225.0176, 2298.0823, 2342.9465, 2367.1731, 2383.9233, 2398.9702, 2421.1741, 2447.1514, 2487.1721, 2503.1665, 2527.1326, 2565.1953, 2705.3037

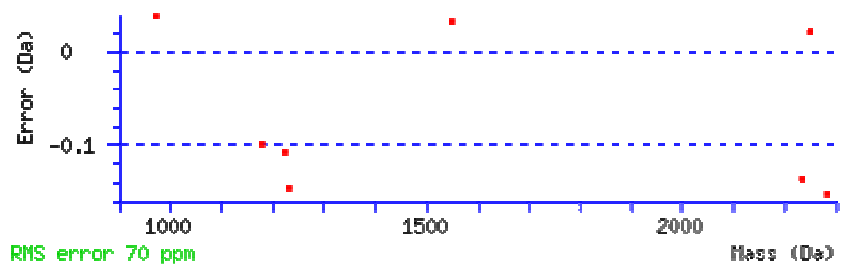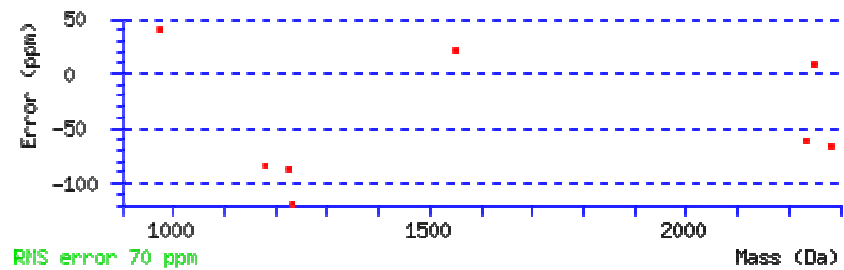

#### 43 Protein disulfide-isomerase A3

Number of mass values searched: **100**

Number of mass values matched: **12**

Sequence Coverage: **29%**

Matched peptides shown in **Bold Red**

1 MRFSC LALLP GVALLLASAR LAAASDVLEL TDENFESRVS DTGSAGLMLV  
51 EFFAPWCGHC KRL**LAPEYEAA ATRLK**GIVPL AK**VDCTANTN TCNKYGV**SGY  
101 **PTLKIFRDGE EAGAYDG**PRT ADGIVSHLKK QAGPASVPLR TEEEFKK**FIS**  
151 **DKDASVVGFF RDLFSDGHSE** FLK**AASNLRD NYRFAHTNIE** SLVKEYDDNG  
201 EGITIFRPLH LANKFED**KTV AYTEKK**MTSG KIKKFIQDSI FGLCPHMTED  
251 NKDLIQGKDL LTAYYDV~~Y~~E KNAKGSNYWR **NRVMMVAK**KF LDAGHKLNFA  
301 VASRKTFSHE LSDFGLESTT GEVPVVAIRT AKGEK**FVMQE EFSR**DGKALE  
351 QFLQEYFDGN LKRYLKSEPI PESNEGPVKV VVAENFDDIV NEEDKDVLI**E**  
401 FYAPWCGHCK NLEPKYKELG EKLSK**DPNIV IAKMDATAND VPSPYE**VKGF  
451 **PTIYFSPANK K**LTPKKYEGG RELNDFISYL QR**EATNPPII QEEKPK**KKKI  
501 AQEDL

Start - End Observed Mr(expt) Mr(calc) Delta Miss Sequence

**63 - 73 1191.4858 1190.4785 1190.5931 -0.1146 0 R.LAPEYEAAATR.L**  
**83 - 94 1397.5238 1396.5165 1396.5711 -0.0546 0 K.VDCTANTNTCNK.Y**  
**95 - 104 1084.4795 1083.4722 1083.5601 -0.0878 0 K.YGVSGYPTLK.I**  
**105 - 119 1652.7998 1651.7925 1651.7590 0.0335 1 K.IFRDGE EAGAYDGPR.T**  
**148 - 161 1587.7723 1586.7650 1586.8093 -0.0443 1 K.FISDKDASVVGFFR.D**  
**174 - 183 1179.5065 1178.4992 1178.5792 -0.0800 1 K.AASNLRDNYR.F**  
**219 - 226 939.3835 938.3762 938.5073 -0.1311 1 K.TVAYTEKK.M**  
**281 - 288 948.5799 947.5726 947.5045 0.0682 1 R.NRVMMVAK.K**  
**336 - 344 1172.4781 1171.4708 1171.5332 -0.0624 0 K.FVMQEEFSR.D**  
**426 - 448 2487.1831 2486.1758 2486.2363 -0.0604 1 K.DPNIVIAKMDATANDVPSPYE**VK.G  
**449 - 461 1469.8680 1468.8607 1468.7714 0.0893 1 K.GFP**TIYFSPANKK.L  
**483 - 496 1593.7750 1592.7677 1592.8409 -0.0732 0 R.EATNPPIIQEEKPK.K**

No match to: 900.3538, 910.6797, 917.3655, 925.5876, 931.6033, 951.6017, 958.6134, 973.5739, 985.5682, 1000.5604, 1002.5692, 1018.5391, 1029.5436, 1031.5409, 1034.1349, 1052.0861, 1058.5259, 1066.0596, 1074.5114, 1082.0176, 1089.5016, 1106.4847, 1108.4194, 1118.4972, 1128.4359, 1142.5299, 1148.5250, 1157.5026, 1165.4969, 1201.5442, 1217.4568, 1233.4561, 1243.5573, 1254.5217, 1265.4882, 1277.5309, 1302.5074, 1307.4823, 1320.3926, 1339.5334, 1350.4648, 1354.4957, 1365.4077, 1379.4806, 1383.4912, 1436.7826, 1475.7843, 1489.8890, 1496.7322, 1507.8590, 1522.8070, 1531.8384, 1542.2322, 1549.8242, 1571.7852, 1578.8258, 1595.7375, 1604.8350, 1634.8448, 1638.7964, 1657.7048, 1669.7882, 1678.8024, 1699.7434, 1707.6891, 1716.7526, 1765.6536, 1780.7019, 1791.6233, 1813.7957, 1837.8231, 1851.8046, 1993.8466, 2046.9325, 2135.9915, 2149.9604, 2185.9792, 2225.0193, 2298.0918, 2383.9058, 2398.9917, 2420.1707, 2447.1414, 2501.2263, 2510.1567, 2643.3877, 2705.2896, 2932.8032

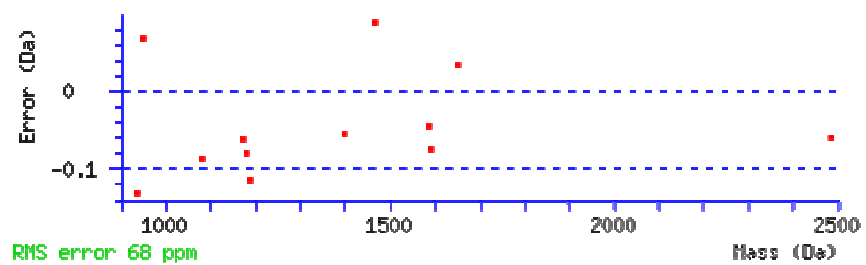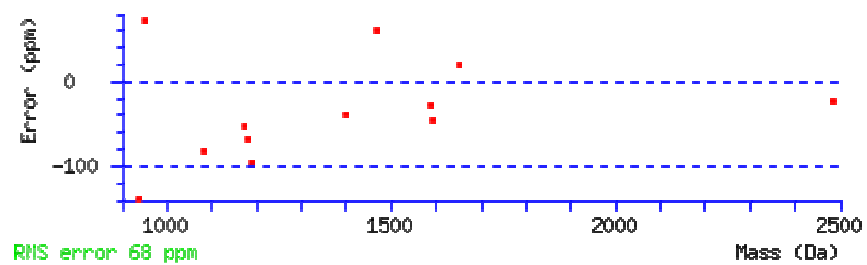

#### 44 Baculoviral IAP repeat-containing protein 4

Number of mass values searched: **200**

Number of mass values matched: **16**

Sequence Coverage: **32%**

Matched peptides shown in **Bold Red**

1 **MTFNSFEGTR TFVLADTNK**D EEFVEEFNRL KTFANFPSSS PVSASTLAR  
51 GFLYTGEGDT VQCFSCHAAI DRWQYGDSAV GRHRRISPNC RFINGFYFEN  
101 GAAQSTNPGI QNGQYKSENC VGNRNPFPD RPPETHADYL LR**TGQVVDIS**  
151 **DTIYPRNPAM CSEEAR**LKSF QNWPDYAHLT PRELASAGLY YTGADDQVQC  
201 FCCGGK**LENW EPCDRAWSEH RRHFPNCFV LGRNVNVRSE** SGVSSDR**NFP**  
251 **NSTNSPRNPA MAEYEAR**IVT FGTWTSSVNK **EQLARAGFYA LGE GDK**VKCF  
301 HCGGGLTDWK PSEDPWEQHA **KWYPGCKYLL DEK**GQEYINN IHLTHSLEES  
351 LGRTAEKTPS LTKKIDDIF QNPMVQEAIR **MGFSFKDIK** TMEEKIQTSG  
401 SSYLSLEVL ADLVSQAKDN TEDESSQTS LKDISTEEQL RRLQEEK**LCK**  
451 **ICMDRNIAIV FVPCGHLVTC** KQCAEAVDKC **PMCYTVITFK QK**IFMS

| Start - End | Observed  | Mr(expt)  | Mr(calc)  | Delta   | Miss | Sequence                                      |
|-------------|-----------|-----------|-----------|---------|------|-----------------------------------------------|
| 2 - 10      | 1058.5304 | 1057.5231 | 1057.4829 | 0.0402  | 0    | <b>M.TFNSFEGTR.T</b>                          |
| 11 - 19     | 1008.5826 | 1007.5753 | 1007.5288 | 0.0466  | 0    | <b>R.TFVLADTNK.D</b>                          |
| 143 - 156   | 1563.8184 | 1562.8111 | 1562.7941 | 0.0171  | 0    | <b>R.TGQVVDISDTIYPR.N</b>                     |
| 157 - 166   | 1164.5131 | 1163.5058 | 1163.4699 | 0.0359  | 0    | <b>R.NPAMCSEEAR.L</b>                         |
| 207 - 221   | 1984.8789 | 1983.8716 | 1983.8646 | 0.0071  | 1    | <b>K.LENW EPCDRAWSEHR.R</b>                   |
| 222 - 233   | 1549.8433 | 1548.8360 | 1548.7772 | 0.0588  | 1    | <b>R.RHFPNCFV LGR.N</b>                       |
| 223 - 233   | 1393.5503 | 1392.5430 | 1392.6761 | -0.1331 | 0    | <b>R.HFPNCFV LGR.N</b>                        |
| 248 - 267   | 2282.0916 | 2281.0843 | 2281.0181 | 0.0662  | 1    | <b>R.NFPNSTNSPRNPAMAEYEAR.I</b> Oxidation (M) |
| 258 - 267   | 1151.5653 | 1150.5580 | 1150.5077 | 0.0504  | 0    | <b>R.NPAMAEYEAR.I</b>                         |
| 281 - 296   | 1724.7717 | 1723.7644 | 1723.8529 | -0.0885 | 1    | <b>K.EQLARAGFYALGEGDK.V</b>                   |
| 322 - 333   | 1571.7914 | 1570.7841 | 1570.7490 | 0.0351  | 1    | <b>K.WYPGCKYLLDEK.G</b>                       |
| 381 - 389   | 1072.5317 | 1071.5244 | 1071.5423 | -0.0179 | 1    | <b>R.MGFSFKDIK.K</b>                          |
| 381 - 389   | 1088.5139 | 1087.5066 | 1087.5372 | -0.0306 | 1    | <b>R.MGFSFKDIK.K</b> Oxidation (M)            |
| 448 - 455   | 1095.5114 | 1094.5041 | 1094.5035 | 0.0006  | 1    | <b>K.LCKICMDR.N</b>                           |
| 451 - 471   | 2503.1919 | 2502.1846 | 2502.2368 | -0.0522 | 1    | <b>K.ICMDRNIAIVFVPCGHLVTC.K</b>               |
| 480 - 492   | 1675.8009 | 1674.7936 | 1674.7932 | 0.0004  | 1    | <b>K.CPMCYTVITFKQK.I</b>                      |

No match to: 904.3263, 909.5662, 915.6188, 921.4772, 924.5657, 927.5797, 931.5951, 937.6382, 939.6525, 945.5093, 947.5278, 949.5990, 951.6136, 957.6036, 964.6121, 968.5801, 971.5947, 973.5872, 982.4763, 985.5765, 996.5970, 999.5604, 1001.5636, 1015.5763, 1023.5335, 1028.1222, 1031.5358, 1034.1337, 1044.0878, 1052.0961, 1066.0269, 1074.5181, 1080.4918, 1082.0267, 1098.0039, 1100.4803, 1106.4858, 1108.4309, 1116.5531, 1118.5065, 1125.4576, 1128.5056, 1135.5518, 1139.5087, 1141.5010, 1145.5497, 1158.5105, 1172.4753, 1179.4999, 1188.4872, 1191.4834, 1200.5409, 1207.4807, 1211.5203, 1217.4541, 1224.5023, 1233.4567, 1242.5189, 1254.9514, 1261.9658, 1265.4873, 1277.5387, 1284.4160, 1292.8944, 1300.3646, 1302.5160, 1307.4900, 1314.5300, 1320.4100, 1327.5083, 1329.4760, 1336.4734, 1339.5317, 1347.4897, 1353.5771, 1361.4825, 1365.4441, 1380.4783, 1383.4723, 1395.5166, 1398.5509, 1406.5264, 1410.6793, 1434.7604, 1436.7858,



1443.7382, 1451.7355, 1459.7939, 1469.8663, 1475.7886, 1487.8560, 1489.8907, 1498.7803, 1503.8452, 1507.8593, 1515.7739, 1525.8257, 1529.8276, 1531.8400, 1546.8070, 1555.8323, 1578.8298, 1585.7734, 1587.7689, 1595.7399, 1604.8457, 1612.7598, 1620.7849, 1630.8220, 1634.8528, 1638.8134, 1649.7533, 1652.7599, 1658.7222, 1660.8190, 1668.7605, 1678.8213, 1688.8577, 1699.7635, 1707.7053, 1716.7675, 1739.8201, 1747.6993, 1765.6547, 1780.6920, 1791.6354, 1794.7123, 1804.8129, 1814.7949, 1836.8486, 1838.8221, 1851.8048, 1866.8135, 1891.8108, 1942.8551, 1950.8467, 1965.9056, 1970.8645, 1978.8594, 1993.8556, 2007.8827, 2022.8680, 2035.8893, 2049.8584, 2064.8950, 2084.8994, 2129.9036, 2149.9727, 2170.9265, 2184.9946, 2193.9048, 2210.9990, 2225.0315, 2234.0139, 2239.0452, 2248.9790, 2265.0430, 2284.0830, 2299.0818, 2308.0510, 2316.0728, 2326.0798, 2342.9558, 2367.1670, 2383.9258, 2398.9939, 2421.1682, 2446.1707, 2448.1201, 2459.1838, 2462.1865, 2481.1643, 2487.1909, 2509.1641, 2527.1702, 2568.2312, 2592.3000, 2609.3145, 2637.3103, 2652.3186, 2664.3694, 2705.3059, 2872.6477, 2902.7173

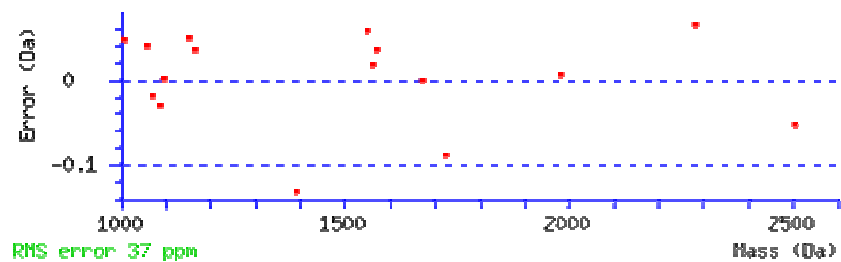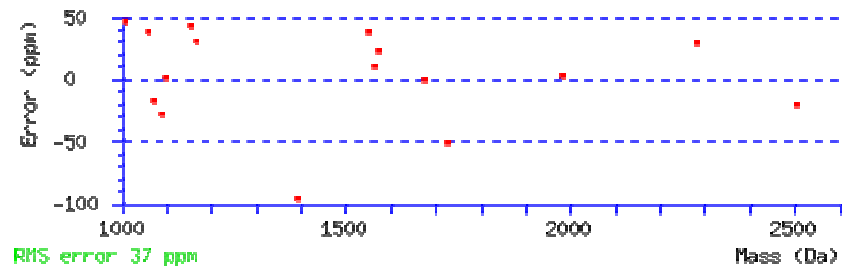

#### 45 Protein disulfide-isomerase A3

Number of mass values searched: **60**

Number of mass values matched: **14**

Sequence Coverage: **26%**

Matched peptides shown in **Bold Red**

1 MRFSCLLLP GVALLSAR LAAASDVLEL TDENFESRVS DTGSAGLMLV  
51 EFFAPWCGHC KR**LAPEYEAA ATR**LKGIVPL AK**VDCTANTN TCNK**YGVSGY  
101 PTLKIFRDGE EAGAYDGPRT ADGIVSHLKK QAGPASVPLR TEEEFKK**FIS**  
151 **DKDASVVGFF** RDLFSDGHSE FLK**AASNLRD NYRFAHTNIE SLVK**EYDDNG  
201 EGITIFRPLH LANKFEDK**TV AYTEKK**MTSG KIKKFIQDSI FGLCPHMTED  
251 NKDLIQGKDL LTAYYDVVYE KNAKGSNYWR NRVMMVAK**KF LDAGHKL**NFA  
301 VASRKTFSHE LSDFGLESTT GEVPVVAIRT AKGEK**FVMQE EFSRDGK****ALE**  
351 **QFLQEYFDGN LK**RYLKSEPI PESNEGPVKV VVAENFDDIV NEEDKDVLI  
401 FYAPWCGHCK NLEPKYKELG EKLSK**DPNIV IAKMDATAND VSPPYEVKGF**  
451 **PTIYFSPANK** KLTPKKEGG RELNDFISYL QREATNPPII  
QEEKPKKKKK  
501 AQEDL

| Start - End | Observed  | Mr(expt)  | Mr(calc)  | Delta   | Miss | Sequence                                           |
|-------------|-----------|-----------|-----------|---------|------|----------------------------------------------------|
| 63 - 73     | 1191.4861 | 1190.4788 | 1190.5931 | -0.1143 | 0    | R.LAPEYEAA <b>ATR</b> .L                           |
| 83 - 94     | 1397.5363 | 1396.5290 | 1396.5711 | -0.0421 | 0    | K.VDCTANT <b>NTCNK</b> .Y                          |
| 148 - 161   | 1587.7706 | 1586.7633 | 1586.8093 | -0.0460 | 1    | K.FISDKDASVVG <b>FFR</b> .D                        |
| 153 - 161   | 997.5461  | 996.5388  | 996.5029  | 0.0359  | 0    | K.DASVVG <b>FFR</b> .D                             |
| 174 - 183   | 1179.4966 | 1178.4893 | 1178.5792 | -0.0899 | 1    | K.AASNLRD <b>NYR</b> .F                            |
| 184 - 194   | 1258.5056 | 1257.4983 | 1257.6717 | -0.1734 | 0    | R.FAHTN <b>IESLVK</b> .E                           |
| 219 - 226   | 939.6486  | 938.6413  | 938.5073  | 0.1340  | 1    | K.TVAY <b>TEKK</b> .M                              |
| 289 - 296   | 915.5537  | 914.5464  | 914.4974  | 0.0490  | 1    | K.KFLDAG <b>HK</b> .L                              |
| 336 - 344   | 1172.4500 | 1171.4427 | 1171.5332 | -0.0905 | 0    | K.FVMQEE <b>FSR</b> .D                             |
| 336 - 344   | 1188.4332 | 1187.4259 | 1187.5281 | -0.1022 | 0    | K.FVMQEE <b>FSR</b> .D Oxidation (M)               |
| 348 - 363   | 1970.8889 | 1969.8816 | 1969.9897 | -0.1081 | 1    | K.ALEQFLQEYFDGN <b>LKR</b> .Y                      |
| 426 - 448   | 2487.2085 | 2486.2012 | 2486.2363 | -0.0350 | 1    | K.DPNIVIAKMDATAND <b>VSPPYEVK</b> .G               |
| 426 - 448   | 2503.2014 | 2502.1941 | 2502.2312 | -0.0371 | 1    | K.DPNIVIAKMDATAND <b>VSPPYEVK</b> .G Oxidation (M) |
| 449 - 460   | 1341.5052 | 1340.4979 | 1340.6765 | -0.1786 | 0    | K.GFPTIY <b>FSPANK</b> .K                          |

No match to: 905.5897, 909.1132, 922.5626, 926.6157, 931.5897, 949.5243, 960.6162, 978.5894, 985.5723, 1002.5583, 1031.5314, 1034.1403, 1052.1051, 1058.5223, 1066.0651, 1072.5240, 1082.0397, 1088.5018, 1108.4208, 1118.5063, 1203.4084, 1215.4387, 1233.4635, 1276.9346, 1354.5446, 1379.4626, 1436.7844, 1475.7886, 1489.8947, 1507.8578, 1531.8473, 1540.9160, 1549.8451, 1555.8401, 1571.7953, 1578.8348, 1595.7444, 1604.8545, 1653.7002, 1765.6614, 1794.7303, 1993.8694, 2211.0142, 2284.0896, 2303.0808, 2448.1509

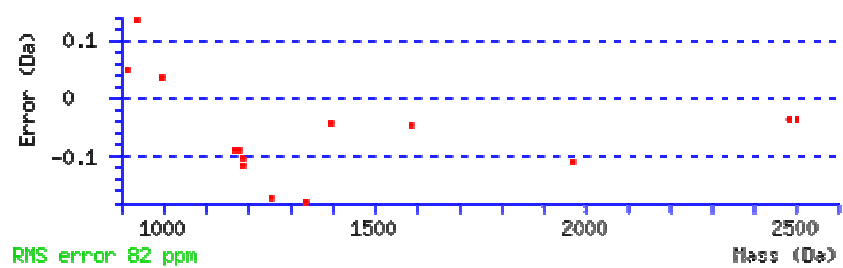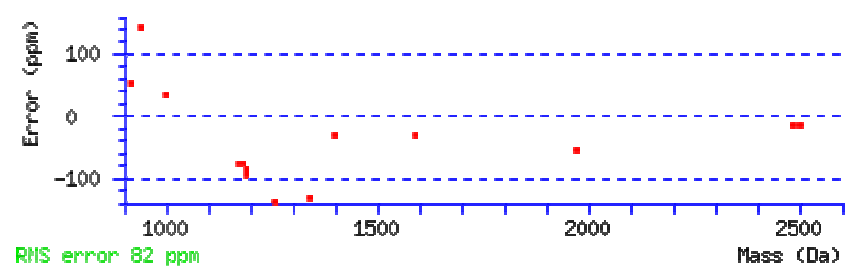

47 Annexin A6

Number of mass values searched: 200

Number of mass values matched: 23

Sequence Coverage: 30%

Matched peptides shown in **Bold Red**

1 **MAKIAQGAMY** RGSVHDFPEF DANQDAEALY TAMKGFSGDK **ESILELITSR**  
51 **SNKQRQEICQ SYK**SLYGKDL IEDLKYELTG **KFERLIVNLM RPLAYCDAKE**  
101 **IKDAISGIGT DEKCLIEILA SRT**NEQMHQL VAAVKDAYER **DLESDDIGDT**  
151 **SGHFQKMLVV LLQG**TRENDV VVSEDLVQQD VQDLYEAGEL KWGTDEAQFI  
201 YILGNRSKQH LRLVFDEYLK TTGKPIEASI RGELSGDFEK LMLAVVKCIR  
251 **STPEYFAERL FK**AMKGLGTR DNTLIR**IMVS RSELDMLDIR** EIFRRTKYEKS  
301 LYSMIK**NDTS GEYK**KALLKL CGGDDDDAAQ FFPEAAQVAY QMWELSAVSR  
351 VELKGTVCAA NDFNPDADAK ALRKAMKGIG TDEATIIV THRSNAQRQQ  
401 IRQTFKSHFG RDLMDL**SE ISGDLARLIL GLMMPPAHYD AKQLKAMEG**  
451 **AGTDEK**TLIE ILATRTNAEI RAINEAYKED YHKSLEDALS SDTSGHFRR  
501 LISLATGNRE EGGENRDQAQ EDAQVAEIL EIADTPSGDK TSLETR**FMTV**  
551 **LCTRSYPHLR** RVFQEFIKKT NYDIEHVIKK EMSGDVKDAF VAIVQSVKKN  
601 PLFFADKLYK SMKGAGTDEK TLTR**VMVSRSEIDLLNIRRE** FIEKYDKSLH  
651 QAIEGDTSGD FMKALLALCG GED

| Start - End | Observed  | Mr(expt)  | Mr(calc)  | Delta   | Miss | Sequence                                    |
|-------------|-----------|-----------|-----------|---------|------|---------------------------------------------|
| 2 - 11      | 1124.6144 | 1123.6071 | 1123.5808 | 0.0263  | 1    | <b>M.AKIAQGAMYR.G</b> Oxidation (M)         |
| 4 - 11      | 909.5129  | 908.5056  | 908.4538  | 0.0518  | 0    | <b>K.IAQGAMYR.G</b>                         |
| 4 - 11      | 925.6273  | 924.6200  | 924.4487  | 0.1713  | 0    | <b>K.IAQGAMYR.G</b> Oxidation (M)           |
| 41 - 50     | 1160.5565 | 1159.5492 | 1159.6448 | -0.0956 | 0    | <b>K.ESILELITSR.S</b>                       |
| 41 - 53     | 1489.8904 | 1488.8831 | 1488.8147 | 0.0684  | 1    | <b>K.ESILELITSRSNK.Q</b>                    |
| 54 - 63     | 1339.5491 | 1338.5418 | 1338.6350 | -0.0932 | 1    | <b>K.QRQEICQSYK.S</b>                       |
| 76 - 84     | 1142.5415 | 1141.5342 | 1141.5768 | -0.0425 | 1    | <b>K.YELTGKFER.L</b>                        |
| 82 - 99     | 2225.0176 | 2224.0103 | 2224.1496 | -0.1393 | 1    | <b>K.FERLIVNLMRPLAYCDAK.E</b> Oxidation (M) |
| 100 - 113   | 1475.7999 | 1474.7926 | 1474.7515 | 0.0411  | 1    | <b>K.EIKDAISGIGTDEK.C</b>                   |
| 114 - 122   | 1074.5299 | 1073.5226 | 1073.5903 | -0.0677 | 0    | <b>K.CLIEILASR.T</b>                        |
| 141 - 166   | 2872.6357 | 2871.6284 | 2871.4801 | 0.1484  | 1    | <b>R.DLESDDIGDTSGHFQKMLVVLLQGTR.E</b>       |
| 157 - 166   | 1145.5651 | 1144.5578 | 1144.6638 | -0.1060 | 0    | <b>K.MLVVLLQGTR.E</b> Oxidation (M)         |
| 251 - 259   | 1099.5760 | 1098.5687 | 1098.4982 | 0.0706  | 0    | <b>R.STPEYFAER.L</b>                        |
| 251 - 262   | 1487.8794 | 1486.8721 | 1486.7456 | 0.1265  | 1    | <b>R.STPEYFAERLFA.A</b>                     |
| 277 - 290   | 1677.8210 | 1676.8137 | 1676.8589 | -0.0452 | 1    | <b>R.IMVSRSELDMLDIR.E</b>                   |
| 307 - 315   | 1041.5938 | 1040.5865 | 1040.4774 | 0.1091  | 1    | <b>K.NDTSGEYK.A</b>                         |

419 - 427 947.6392 946.6319 946.4720 0.1600 0 K.SEISGLAR.L  
428 - 442 1669.8192 1668.8119 1668.8731 -0.0612 0 R.LILGLMPPAHYDAK.Q  
446 - 456 1136.5907 1135.5834 1135.5179 0.0655 1 K.KAMEGAGTDEK.T  
547 - 560 1780.7242 1779.7169 1779.8913 -0.1743 1 R.FMTVLCTRSYPHLR.R  
625 - 638 1660.8337 1659.8264 1659.8978 -0.0713 1 R.VMVRSEIDLLNIR.R Oxidation (M)  
630 - 638 1072.5457 1071.5384 1071.5924 -0.0540 0 R.SEIDLLNIR.R  
630 - 639 1228.5779 1227.5706 1227.6935 -0.1229 1 R.SEIDLLNIRR.E

No match to: 902.3297, 912.6599, 917.3350, 923.3141, 927.5966, 933.3251, 938.3191, 941.6031, 949.6148, 951.6191, 957.6006, 961.2943, 968.6296, 971.6370, 978.6185, 982.6274, 985.5771, 996.6400, 1000.5736, 1002.5809, 1012.1840, 1014.1728, 1022.1454, 1028.1367, 1034.1469, 1044.1022, 1052.1079, 1058.5363, 1066.0697, 1082.0297, 1088.5269, 1089.5155, 1102.5433, 1106.4873, 1114.5593, 1118.5138, 1130.5554, 1151.6183, 1163.5468, 1173.5382, 1179.5200, 1186.5826, 1189.5122, 1191.4945, 1201.5642, 1209.5817, 1218.4683, 1233.4590, 1240.0066, 1247.5530, 1254.9637, 1261.9761, 1268.5665, 1270.9272, 1276.9459, 1283.5490, 1292.8998, 1299.5718, 1305.5212, 1313.5601, 1320.4060, 1327.5416, 1351.4868, 1353.9762, 1354.4916, 1361.5011, 1365.4480, 1377.5085, 1383.4939, 1392.6344, 1399.5668, 1410.6934, 1419.6572, 1427.7190, 1434.7925, 1436.7821, 1443.8463, 1453.8320, 1460.8423, 1463.8253, 1479.8291, 1496.8549, 1503.8484, 1507.8607, 1516.8154, 1523.8145, 1529.8428, 1531.8477, 1541.3281, 1543.1588, 1549.8425, 1555.8342, 1562.8307, 1567.7406, 1574.8114, 1577.8175, 1584.7854, 1587.7584, 1593.7805, 1604.8505, 1623.8389, 1630.8431, 1634.8752, 1639.8689, 1650.8175, 1675.8304, 1686.8999, 1695.8170, 1704.8293, 1707.6829, 1716.7665, 1722.7987, 1724.7706, 1732.5951, 1740.7520, 1748.6149, 1764.6416, 1766.6744, 1791.6312, 1794.7061, 1807.9426, 1837.8220, 1851.7914, 1880.7966, 1888.8207, 1894.8176, 1907.7899, 1921.8118, 1932.8064, 1940.8011, 1955.8087, 1960.8378, 1969.8264, 1978.8650, 1993.8558, 2002.9230, 2044.9052, 2075.9290, 2082.8723, 2094.9231, 2149.9631, 2192.9707, 2234.0093, 2248.9932, 2265.0369, 2283.0847, 2298.0950, 2308.0410, 2318.0674, 2336.0840, 2350.1064, 2367.1487, 2383.8972, 2400.0945, 2421.1663, 2434.1384, 2446.1611, 2448.1431, 2458.1665, 2462.1631, 2473.9619, 2481.1582, 2487.1614, 2503.1655, 2512.1646, 2525.1560, 2547.1470, 2566.2434, 2585.2244, 2593.2688, 2609.2954, 2636.2959, 2652.3203, 2705.2920, 2719.3877, 2737.5034, 2780.6074

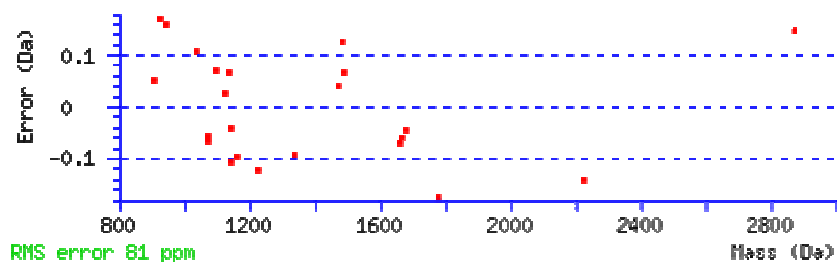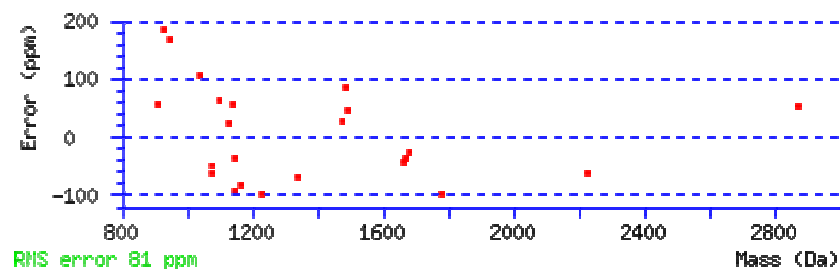

**48 RNA polymerase I-specific transcription initiation factor RRN3**

Number of mass values searched: **70**

Number of mass values matched: **10**

Sequence Coverage: **21%**

Matched peptides shown in **Bold Red**

**1 MAAPLLHTRL SGDVTAAASA TLSASR**TGLS DMLAESDFF NSPPKKTVERF  
**51 GGTVTEVLLK** YKGETNDLE LLKNQLSDPD IK**DDQIINWL LEFRSSVMYL**  
**101 TKDFEQLINI ILR**LPWLNRS QRVVEEYLAF LGNLVSAQTV FLRPCLSMIA  
**151 SHFVPPRVIV** KEGGIDVSDS DEDDNLPAI FDTCHRALQI ITR**YVPSTPW**  
**201 FLMPILVEKF PFVR**KSERTEC ECYVHLLRI **SLYFPTLRRE ILELVIEKLL**  
**251 KLDVSVSRQD** IEDAEKAAQ TCGGDTTTEG LFNMDDEDTE DPEKK**ADQEQ**  
**301 PNQMAHPTAE R**LDVLLCLLL SYIEDVCRVH GKIDNNKTKD LYRDLISIFD  
**351 KLLLPTHASC** HVQFFMFFLC SFKLGFAEAF LEHLWKKLQD PNNPAIRQA  
**401 AANYIGSFLA** RAKFIPLITV KTCLDLLVNW LHMYLTNQDS GTKAFCDVAL  
**451 HGPFYSACQA** VFYTVVFRHK QLLSGNLKQG LQYLQSLNFE RIVLSQLNPL  
**501 KICLPQVVNF** FAAITNK**YQL VFCYTIMER**N SRQMLPVIRS TAGGDSVQTC  
**551 TNPLDTFFPF** DPCVLKRSKK FIDPIYQIWE DGSAAELQEF KKSTKKEVVE  
**601 DEDDDFLKGE** VPQSDTVTGL TPSSFDTHFQ SPSSSVGSPP VLYIPGQSPL  
**651 LTRIYD**

**Start - End Observed Mr(expt) Mr(calc) Delta Miss Sequence**

**1 - 26 2584.2317 2583.2244 2583.3439 -0.1194 1 -.MAAPLLHTRLSDGVTAAASATLSASR.T** Oxidation (M)  
**10 - 26 1577.7960 1576.7887 1576.8056 -0.0169 0 R.LSGDVTAAASATLSASR.T**  
**50 - 60 1163.5471 1162.5398 1162.6598 -0.1200 0 R.FGGTVTEVLLK.Y**  
**83 - 102 2487.1519 2486.1446 2486.2515 -0.1069 1 K.DDQIINWLLLEFRSSVMYLTK.D** Oxidation (M)  
**95 - 113 2283.0703 2282.0630 2282.2344 -0.1714 1 R.SSVMYLTKDFEQLINIILR.L**  
**194 - 214 2566.2681 2565.2608 2565.3858 -0.1250 1 R.YVPSTPWFLMPILVEKFPFVR.K**  
**230 - 238 1109.4633 1108.4560 1108.6281 -0.1720 0 R.ISLYFPTLR.R**  
**240 - 251 1439.8019 1438.7946 1438.9010 -0.1064 1 R.EILELVIEKLLK.L**  
**296 - 311 1838.8049 1837.7976 1837.8013 -0.0037 0 K.ADQEQPNQMAHPTAER.L** Oxidation (M)  
**518 - 529 1638.8075 1637.8002 1637.7582 0.0420 0 K.YQLVFCYTIMER.N** Oxidation (M)

No match to: 905.1517, 911.3470, 921.3244, 927.5944, 996.6245, 1034.1428, 1052.1022, 1058.5378, 1068.5186, 1072.0670, 1078.0757, 1094.0360, 1179.5083, 1233.4739, 1320.4038, 1365.4346, 1383.4698, 1415.5986, 1435.7754, 1475.7936, 1479.8259, 1493.8191, 1501.7921, 1507.8530, 1523.7920, 1549.8290, 1555.8292, 1589.6996, 1707.6877, 1724.7415, 1740.7133, 1765.6522, 1794.7042, 1880.7908, 1888.7931, 1894.8065, 1907.7803, 1993.8428, 2022.9015, 2044.8958, 2095.9092, 2149.9534, 2192.9417, 2225.0107, 2233.9927, 2254.9629, 2267.0195, 2298.0657, 2307.0525, 2327.0771, 2342.9233, 2367.1711, 2383.8948, 2398.9758, 2419.1543, 2447.1350, 2501.2080, 2509.1458, 2705.2708, 2872.6084

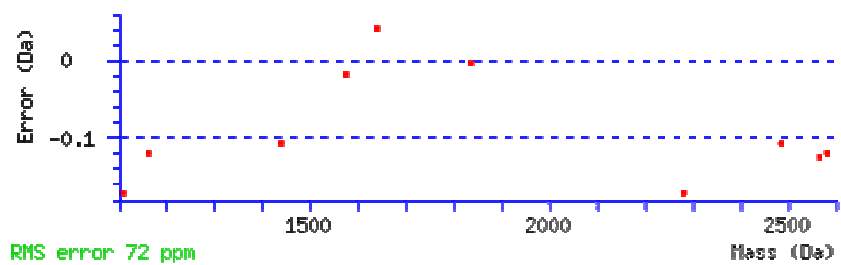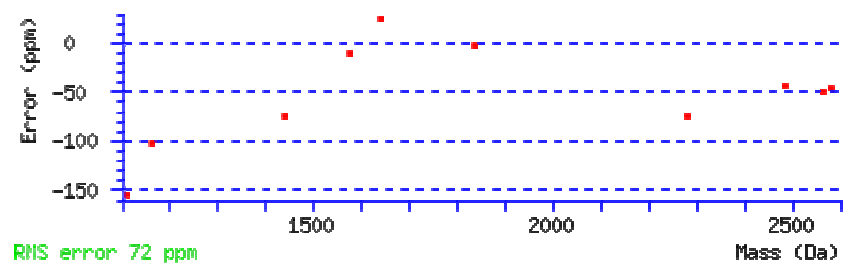

**49 Collagen type IV alpha-3-binding protein**

Number of mass values searched: **50**

Number of mass values matched: **8**

Sequence Coverage: **20%**

Matched peptides shown in **Bold Red**

1 MSDNQSWNSS GSEEDPETES GPPVERCGVL SKWTNYIHGW QDRWVVLKNN  
51 TLSYYKSEDE TEYGCRGSIC LSKAVITPHD FDECR**FDISV NDSVWYLRAQ**  
101 **DPEHR**QQWVD AIEQHKTESG YGSESSLRRH **GSMVSLVSGA SGYSATSTSS**  
151 **FKKGHSLREK LAEMETFR**DI LCRQVDTLQK YFDVCADAVS KDELR**DKVV**  
201 **EDDEDDFPTT** RSDGDFLHNT NGNKEKLFPH VTPKGINGID FKGEAITFKA  
251 **TTAGILATLS HCIELMVK**RE ESWQKRHDRE VEKRRR**VEEA YKNVMEELK**K  
301 KPRFGGPDYE EGPNSLINEE EFFDAVEAAL DRQDKIEEQS QSEKVRHLWHP  
351 TSLPSGDTFS SVGTHRFVQK PYSRSSSMSS IDLVASDDV HRFSSQVEEM  
401 VQNHMNYSLQ DVGGDANWQL VVEEGEMKVY RREVEENGIV LDPLKATHAV  
451 KGVTGHEVCN YFWNVVDVRND WETTIENTFHV VETLADNAII VYQTHKRWWP  
501 ASQRDVLYLS AIRKIPALTE NDPETWIVCN FSDVHDSAPL NNRCVRAK**IN**  
551 **IAMICQTLVS PPEGDQEISR** DNILCKITYV ANVNPWWAP ASVLRAVAKR  
601 EYPKFLKR**FT SYVQEK**TAGK PILF

| Start - End      | Observed         | Mr(expt)         | Mr(calc)         | Delta          | Miss     | Sequence                                         |
|------------------|------------------|------------------|------------------|----------------|----------|--------------------------------------------------|
| <b>86 - 105</b>  | <b>2447.1326</b> | <b>2446.1253</b> | <b>2446.1666</b> | <b>-0.0412</b> | <b>1</b> | <b>R.FDISVNDSVWYLRAQDPEHR.Q</b>                  |
| <b>130 - 152</b> | <b>2264.0281</b> | <b>2263.0208</b> | <b>2263.0427</b> | <b>-0.0219</b> | <b>0</b> | <b>R.HGSMVSLVSGASGYSATSTSSFK.K</b> Oxidation (M) |
| <b>161 - 168</b> | <b>996.6193</b>  | <b>995.6120</b>  | <b>995.4746</b>  | <b>0.1374</b>  | <b>0</b> | <b>K.LAEMETFR.D</b>                              |
| <b>197 - 211</b> | <b>1780.6882</b> | <b>1779.6809</b> | <b>1779.7799</b> | <b>-0.0990</b> | <b>1</b> | <b>R.DKVVEDDEDDFPTTR.S</b>                       |
| <b>250 - 268</b> | <b>2044.8956</b> | <b>2043.8883</b> | <b>2044.0697</b> | <b>-0.1813</b> | <b>0</b> | <b>K.ATTAGILATLSHCIELMVK.R</b> Oxidation (M)     |
| <b>287 - 299</b> | <b>1581.7310</b> | <b>1580.7237</b> | <b>1580.7756</b> | <b>-0.0518</b> | <b>1</b> | <b>R.VEEAYKNVMEELK.K</b>                         |
| <b>549 - 570</b> | <b>2487.1514</b> | <b>2486.1441</b> | <b>2486.2145</b> | <b>-0.0704</b> | <b>0</b> | <b>K.INIAMICQTLVSPPEGDQEISR.D</b> Oxidation (M)  |
| <b>609 - 616</b> | <b>1001.5640</b> | <b>1000.5567</b> | <b>1000.4866</b> | <b>0.0702</b>  | <b>0</b> | <b>R.FTSYVQEK.T</b>                              |

No match to: 900.3560, 917.3723, 927.5807, 941.5848, 985.5720, 1034.1315, 1058.5311, 1068.4988, 1089.5067, 1108.4294, 1118.5103, 1163.5398, 1233.4495, 1305.5083, 1339.5388, 1436.7826, 1439.7977, 1479.8204, 1489.8784, 1496.8501, 1507.8569, 1549.8376, 1555.8224, 1567.7225, 1577.8101, 1595.7365, 1604.8337, 1639.8464, 1724.7367, 1740.7216, 1749.6202, 1766.6689, 1794.6951, 1880.7917, 1894.7988, 1907.7747, 1993.8441, 2225.0081, 2233.9954, 2282.0747, 2284.0742, 2298.0830



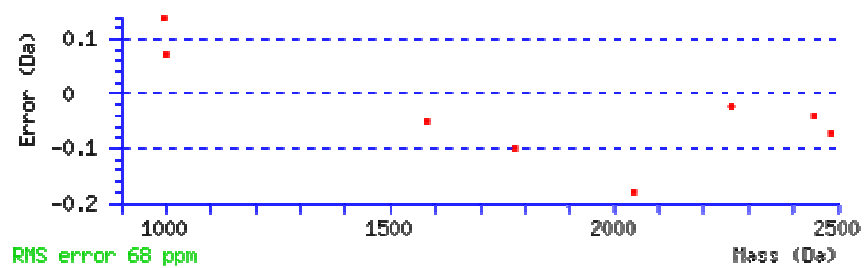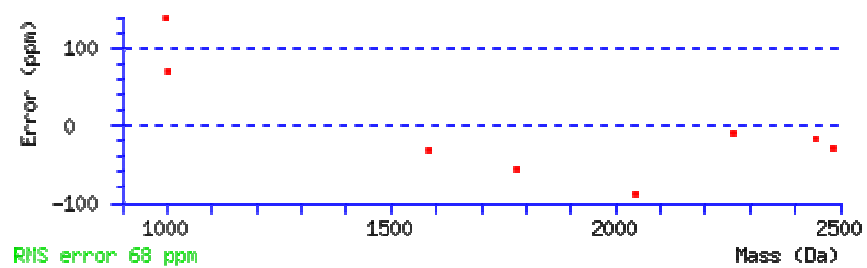

## 50 Calpain-9

Number of mass values searched: **200**

Number of mass values matched: **13**

Sequence Coverage: **26%**

Matched peptides shown in **Bold Red**

1 MPYLHR**SLRP QPQPVPGDAR TIHSSGQSFE QLR**QGCLQSG TLFEDADFP  
51 SNVSLFYSER PQVPFVWKR GEIVEKPEFI LGGATRTDIC QGELGDCWLL  
101 AAIALSLTLNQ KALTRVVPQD QGFGSGYAGI FHFQFWQHSE WLDVVIDDRL  
151 PTFKDRLVFL HSADHNEFWS ALLEKAYAKL NGSYEALEGG SAIEAMEDFT  
201 GGVAENFQIR EAPEDFFEIL EKALK**RGSLL GCSIDTLNAS ESEARTSLGL**  
251 **IKGHAYTVTG LDQVNFHGQR IKLIRVRNPW GQVEWNGPWS DSSPEWRSVD**  
301 LEEQK**RLGHT ALDDGEFWMA FK**DFKIHFDK VEICNLTPDA LEDSAHRWE  
351 VTIHQGSWVR GSTAGGCRNF LDTFWTNPQI KLSLTER**DEG QEGCTFLAAL**  
401 **MQKDRRRLKR FGANMLTIGY AIYQCPDKDG HLSRDFFR**YH ASLARSKTFI  
451 NLREVSERFQ LPPGDYILIP STFEPHQEAD FCLRIFSEKR AVTRDLDENI  
501 DIDLPELKP TPQEEETEEE QQFRALFQRV **AGEDMEVSAE ELEYVNAVL**  
551 **QKKTALKFKR LSLSCRNI SLMDTSGNGK** LEFEEFR**VFW DKLKH**WMDLF  
601 LQFDVDKSGT MSSYELRTAL KAAGFQLGGH LLQLVLRYA DEDLQLDFDD  
651 YLNCLVRL**LEN ASRVFQSLSV** KNKDFIHLNI NEFISLTMNI

| Start - End | Observed  | Mr(expt)  | Mr(calc)  | Delta   | Miss | Sequence                                         |
|-------------|-----------|-----------|-----------|---------|------|--------------------------------------------------|
| 7 - 20      | 1517.7799 | 1516.7726 | 1516.8110 | -0.0384 | 0    | <b>R.SLRPQPQPVPGDAR.T</b>                        |
| 21 - 33     | 1489.8881 | 1488.8808 | 1488.7321 | 0.1487  | 0    | <b>R.TIHSSGQSFEQLR.Q</b>                         |
| 226 - 245   | 2135.9812 | 2134.9739 | 2135.0277 | -0.0537 | 1    | <b>K.RGSLLGCSIDTLNASESEAR.T</b>                  |
| 227 - 252   | 2692.4995 | 2691.4922 | 2691.3749 | 0.1173  | 1    | <b>R.GSLLGCSIDTLNASESEARTSLGLIK.G</b>            |
| 306 - 322   | 1993.8455 | 1992.8382 | 1992.9516 | -0.1134 | 1    | <b>K.RLGHTALDDGEFWMAFK.D</b>                     |
| 307 - 322   | 1837.8071 | 1836.7998 | 1836.8505 | -0.0507 | 0    | <b>R.LGHTALDDGEFWMAFK.D</b>                      |
| 388 - 403   | 1813.7733 | 1812.7660 | 1812.8022 | -0.0362 | 0    | <b>R.DEGQEGCTFLAALMQK.D</b> Oxidation (M)        |
| 410 - 428   | 2233.9817 | 2232.9744 | 2233.0660 | -0.0916 | 1    | <b>K.RFGANMLTIGYAIYQCPDK.D</b> Oxidation (M)     |
| 429 - 438   | 1249.4950 | 1248.4877 | 1248.6000 | -0.1123 | 1    | <b>K.DGHLSRDFFR.Y</b>                            |
| 530 - 553   | 2680.3801 | 2679.3728 | 2679.3313 | 0.0416  | 1    | <b>R.VAGEDMEVSAEELEYVNAVLQKK.T</b> Oxidation (M) |
| 561 - 580   | 2194.9448 | 2193.9375 | 2194.1086 | -0.1710 | 1    | <b>R.LSLSCRNIISLMDTSGNGK.L</b> Oxidation (M)     |
| 588 - 594   | 935.3381  | 934.3308  | 934.5276  | -0.1968 | 1    | <b>R.VFWDKLLK.H</b>                              |
| 658 - 671   | 1577.8038 | 1576.7965 | 1576.8573 | -0.0608 | 1    | <b>R.LENASRVFQSLSVK.N</b>                        |

No match to: 905.3300, 909.1039, 916.3305, 922.3142, 927.5897, 933.3311, 938.3033, 941.5869, 948.3018, 951.3071, 958.3135, 964.2993, 968.2548, 977.2985, 985.5811, 996.6151, 1002.5854, 1012.1665, 1022.1423, 1028.1289, 1034.1373, 1044.0934, 1052.0983, 1058.5376, 1060.0601, 1066.0592, 1072.0742, 1082.0270, 1088.0360, 1097.9929, 1103.9977, 1110.4823, 1118.5260, 1142.5225, 1151.6027, 1163.5565, 1179.5166, 1193.5009, 1218.4747, 1223.0303, 1233.4574, 1238.9926, 1254.9559, 1261.9673, 1270.9175, 1276.9293, 1283.5374, 1291.5000, 1292.8967, 1306.5088, 1313.5675, 1320.4485, 1334.4587, 1339.5229, 1350.4932, 1357.4855, 1365.4561, 1383.4686, 1399.5476, 1415.6119, 1436.7765, 1439.7968, 1446.7717, 1450.1492, 1453.8231, 1462.7925, 1466.1490, 1475.7952,

1479.8246, 1486.8202, 1493.8304, 1501.7882, 1507.8538, 1523.7709, 1531.8394, 1549.8363, 1555.8293, 1567.7198, 1574.8036, 1581.7418, 1589.7075, 1596.7417, 1604.8148, 1612.7150, 1624.7590, 1630.8070, 1638.8091, 1649.7606, 1657.7340, 1665.7599, 1669.7847, 1677.7629, 1690.7710, 1694.7604, 1707.7018, 1715.7562, 1724.7472, 1732.7189, 1740.7324, 1749.7350, 1754.7177, 1763.6917, 1766.6866, 1781.7284, 1791.6514, 1794.7183, 1803.7739, 1821.7622, 1851.8158, 1867.7748, 1880.7999, 1888.7974, 1894.8097, 1902.7983, 1907.7975, 1915.7743, 1921.7960, 1930.7806, 1940.8037, 1949.8121, 1964.8499, 1978.8367, 1986.8525, 2002.8846, 2015.8427, 2022.8669, 2029.8842, 2037.8561, 2044.8960, 2058.9016, 2066.8943, 2076.9033, 2085.8708, 2095.8984, 2101.9185, 2115.9199, 2149.9512, 2170.9143, 2185.9570, 2206.9805, 2210.9900, 2225.0081, 2248.9900, 2264.0132, 2279.0559, 2283.0662, 2296.0632, 2299.0474, 2308.0488, 2319.0691, 2342.9780, 2349.1167, 2358.0381, 2372.0625, 2383.8970, 2399.0220, 2403.1580, 2416.1289, 2419.1428, 2429.1023, 2446.1433, 2448.1357, 2458.1501, 2482.1492, 2487.1460, 2501.2063, 2510.1462, 2525.1604, 2541.1853, 2554.2046, 2564.3054, 2584.2332, 2594.2590, 2602.2693, 2612.2781, 2626.2852, 2637.2834, 2651.3340, 2661.3315, 2705.2568, 2736.4053, 2746.4963, 2780.5745, 2872.5935, 2902.6458, 2932.7639, 3052.9626

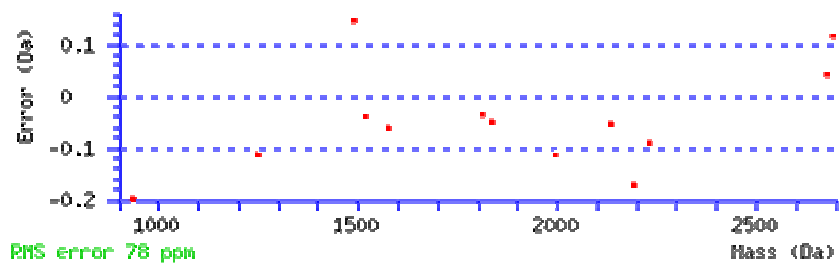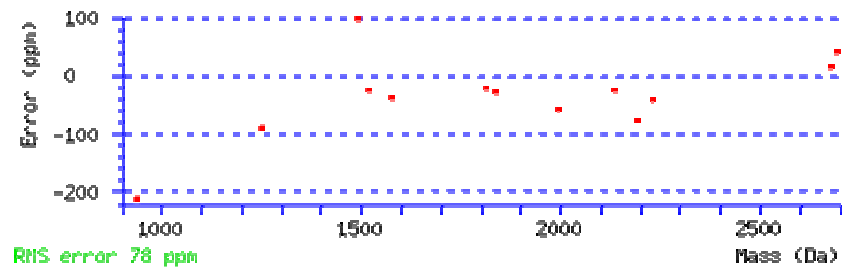

**51 Heat shock cognate 71 kDa protein**

Number of mass values searched: **50**

Number of mass values matched: **13**

Sequence Coverage: **26%**

Matched peptides shown in **Bold Red**

1 MSK**GPAVGID LGTTYSCVGV FQH GKVEIIA NDQGNRTTPS YVAFTDTER**  
51 IGDAAK**NQVA MNPTNTVFDA** KRLIGRRFDD AVVQSDMKHW PFMVVNDAGR  
101 PKVQVEYKGE TK**SFYPEEVS SMVLTKMKEI** AEAYLGK**TVT NAVVTVPAYF**  
151 **NDSQR**QATKD **AGTIAGLNVL RIINEPTAAA IAYGLDKKVG** AERNVLIFDL  
201 GGGTFDVSIL TIEDGIFEVK **STAGDTHLGG EDFDNRMVNH FIAEFK**RKHK  
251 KDISENKRAV RRLRTACERA KRTLSSSTQA SIEIDSLYEG IDFYTSITRA  
301 **RFEELNADLF** RGTLPVEKA LRDAKLDKSQ IHDIVLVGGS TRIPKIQKLL  
351 QDFFNKELN KSINPDEAVA YGAAVQAAIL SGDKSENVQD LLLLDVTPLS  
401 LGIETAGGVM TVLIKRNTTI PTKQTQFTT YSDNQPGVLI QVYEGERAMT  
451 KDNLLGKFE LTGIPPAPRG VPQIEVTFDI DANGILNVSA VDKSTGKENK  
501 ITITNDKGR LSKEDIERMVQ EAEKYKAED EQRDKVSSKN SLESYAFNMK  
551 ATVEDEKLQG KINDEKQKI LDK**CNEIISW LDK**NQTAEKE EFEHQKKELE  
601 KVCNPIITKL YQSAGGMPGG MPGGFPGGGA PPSGGASSGP TIEEVD

| Start - End | Observed  | Mr(expt)  | Mr(calc)  | Delta   | Miss | Sequence                                    |
|-------------|-----------|-----------|-----------|---------|------|---------------------------------------------|
| 4 - 25      | 2263.0352 | 2262.0279 | 2262.1104 | -0.0824 | 0    | <b>K.GPAVGIDLGGTTYSCVGVFQHGK.V</b>          |
| 26 - 36     | 1228.4901 | 1227.4828 | 1227.6207 | -0.1379 | 0    | <b>K.VEIIANDQGNR.T</b>                      |
| 37 - 49     | 1487.7269 | 1486.7196 | 1486.6940 | 0.0256  | 0    | <b>R.TTPSYVAFTDTER.L</b>                    |
| 57 - 71     | 1649.7430 | 1648.7357 | 1648.7879 | -0.0522 | 0    | <b>K.NQVAMNPTNTVFDK.R</b>                   |
| 113 - 128   | 1907.7919 | 1906.7846 | 1906.9056 | -0.1210 | 1    | <b>K.SFYPEEVSSMVLTKMK.E</b> 2 Oxidation (M) |
| 138 - 155   | 1981.8618 | 1980.8545 | 1980.9905 | -0.1360 | 0    | <b>K.TVTNAVVTVPAYFNDSQR.Q</b>               |
| 160 - 171   | 1199.5560 | 1198.5487 | 1198.6670 | -0.1183 | 0    | <b>K.DAGTIAGLNVLR.I</b>                     |
| 172 - 187   | 1659.7927 | 1658.7854 | 1658.8879 | -0.1025 | 0    | <b>R.IINEPTAAAIAAYGLDK.K</b>                |
| 221 - 236   | 1691.6429 | 1690.6356 | 1690.7183 | -0.0827 | 0    | <b>K.STAGDTHLGGEDFDNR.M</b>                 |
| 237 - 246   | 1235.4639 | 1234.4566 | 1234.6169 | -0.1602 | 0    | <b>R.MVNHFAEFK.R</b>                        |
| 300 - 311   | 1480.8118 | 1479.8045 | 1479.7470 | 0.0575  | 1    | <b>R.ARFEELNADLFR.G</b>                     |
| 302 - 311   | 1253.4620 | 1252.4547 | 1252.6088 | -0.1541 | 0    | <b>R.FEELNADLFR.G</b>                       |
| 574 - 583   | 1277.4952 | 1276.4879 | 1276.6122 | -0.1242 | 0    | <b>K.CNEIISWLDK.N</b>                       |

No match to: 927.5770, 941.5832, 1002.5743, 1058.5294, 1066.0536, 1082.5155, 1089.4877, 1108.4257, 1163.5367, 1179.5006, 1211.5510, 1267.4670, 1292.4679, 1307.4840, 1415.6079, 1439.7983, 1457.7843, 1479.8204, 1494.8153, 1501.7424, 1508.8452, 1555.8235, 1567.7205, 1595.7357, 1639.8617, 1668.7748, 1705.6669, 1724.7461, 1746.6854, 1766.6730, 1794.7031, 1880.7963, 1993.8529, 2225.0266, 2284.0864, 2447.1526, 2775.4980

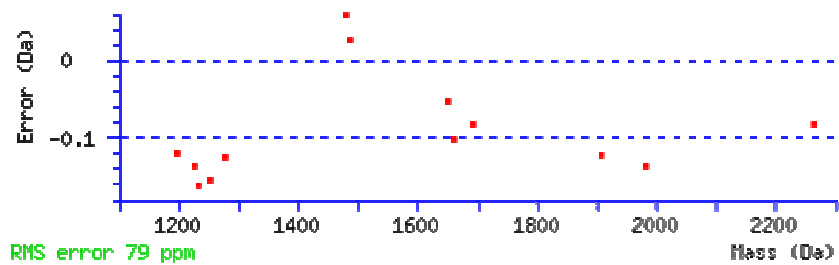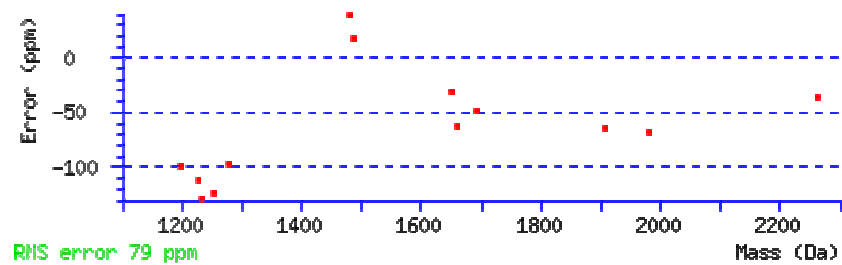

**52 Cytochrome P450 2D11**

Number of mass values searched: **250**

Number of mass values matched: **16**

Sequence Coverage: **43%**

Matched peptides shown in **Bold Red**

1 **MELLTGAGLW SVAIFTVIFI LLVDMHR**HQ HWTSRCPGPG VPWPVLGNL  
51 QVDLDNMPYS LYKLQNR**YGD VFSLQMAWKP MVVINGLKAM** KEMLLTCGED  
101 TADRPPVPIF EYLGVKPGSQ GVVLPAPYGP WREQRRFSVS TLRNFGLG**K**  
151 **SLEEWVTKEA RHLCDAF**TAQ AGQPINPNM LNKSTCNVIA SLIFARRFEY  
201 **EDPFLIRMLK** MLK**ECFTEIS GFIPGVLNEF PIFLRIPGLA DMVFQGGKSF**  
251 **MAILDNLLTE NR**TTWDPDQP PR**NLDAFLA EIEKAK**GNAE SSFNENLRM  
301 VVLDLFTAGM VTTSTTLSWA LLLMILHPDV QRR**VQQEIDA VIGVQHP**EM  
351 **ADQAR**MPYTN AVIHEVQRFGL TLLHCLCHAS QVVFTFTQVQD FLVTKGSTLI  
401 PNLSSVLKGE TWWEKPLRFH PEHFLDAQGH FVKPEAFMPF SAGHR**SCLGE**  
451 **ALARMELFLF FTCLLQRFSI SVPDGGQP**PS NYR**VHAI**PVA PFPYQLCAVM  
501 HEQGH

Start - End Observed Mr(expt) Mr(calc) Delta Miss Sequence

2 - 28 **3027.7537 3026.7464 3026.7031 0.0433 0 M.ELLTGAGLWSVAIFTVIFILLVDMHR.H**  
68 - 91 **2774.5020 2773.4947 2773.4005 0.0942 1 R.YGDVFSLQMAWKPMVVINGLKAMK.E** 3 Oxidation (M)  
150 - 158 **1119.5321 1118.5248 1118.5972 -0.0723 1 K.KSLEEWVTK.E**  
159 - 183 **2809.4688 2808.4615 2808.3435 0.1180 1 K.EARHLCDAF**TAQAGQPINPNMLNK.S Oxidation (M)  
198 - 210 **1700.7227 1699.7154 1699.8643 -0.1489 1 R.FEYEDPFLIRMLK.M**  
214 - 235 **2585.2305 2584.2232 2584.3036 -0.0804 0 K.ECFTEISGFIPGVLNEFPIFLR.I**  
236 - 248 **1403.9181 1402.9108 1402.7279 0.1829 0 R.IPGLADMVFQGGK.S**  
249 - 262 **1652.7998 1651.7925 1651.8239 -0.0314 0 K.SFMAILDNLLTENR.T** Oxidation (M)  
273 - 284 **1363.5548 1362.5475 1362.7031 -0.1555 0 R.NLDAFLAEIEK.A**  
273 - 286 **1562.7958 1561.7885 1561.8351 -0.0466 1 R.NLDAFLAEIEKAK.G**  
333 - 355 **2618.3564 2617.3491 2617.3031 0.0461 1 R.RVQQEIDAVIGVQHP**EMADQAR.M  
333 - 355 **2634.4277 2633.4204 2633.2980 0.1224 1 R.RVQQEIDAVIGVQHP**EMADQAR.M Oxidation (M)  
446 - 467 **2691.4734 2690.4661 2690.3383 0.1279 1 R.SCLGEALARMELFLFF**TCLLQR.F Oxidation (M)  
455 - 467 **1717.7565 1716.7492 1716.8732 -0.1239 0 R.MELFLFF**TCLLQR.F  
455 - 467 **1733.7054 1732.6981 1732.8681 -0.1699 0 R.MELFLFF**TCLLQR.F Oxidation (M)  
468 - 483 **1791.6750 1790.6677 1790.8588 -0.1910 0 R.FSISVPDGGQP**PSNYR.V

No match to: 907.5479, 909.0749, 915.0704, 920.9401, 921.5902, 923.2885, 926.6112, 928.3618, 931.5953, 937.6088, 938.5287, 941.3238, 947.3952, 953.0029, 953.5353, 955.2898, 959.1671, 965.2753, 967.0538, 969.4506, 975.3014, 982.6368, 990.4473, 996.6091, 1001.5267, 1002.5798, 1012.5142, 1018.3087, 1031.5204, 1034.1117, 1045.1688, 1058.5436, 1066.0367, 1081.9880, 1087.9943, 1101.9690, 1104.9484, 1106.4941, 1113.8204, 1125.5520, 1131.8561, 1132.6453, 1139.5007, 1144.5502, 1147.8733, 1155.4973, 1161.5563, 1164.6033, 1173.8469, 1175.4525, 1179.4915, 1188.4099, 1191.4976, 1201.4767, 1219.5328, 1227.2256, 1232.9282, 1233.4408, 1240.5316, 1244.9423, 1253.1119, 1260.6532, 1262.5392, 1265.4634, 1272.4235, 1277.5248, 1292.8252, 1300.4434,

1302.4131, 1307.8585, 1316.5564, 1320.3784, 1337.6829, 1345.4811, 1350.4739, 1358.4442, 1365.4645, 1378.7483, 1384.4556, 1423.7473, 1430.6393, 1434.8232, 1436.7800, 1456.7441, 1461.8280, 1475.7792, 1482.7140, 1485.8179, 1489.8563, 1491.8064, 1498.7263, 1507.8450, 1519.9243, 1527.8856, 1529.8103, 1540.9769, 1549.8546, 1555.8088, 1571.7567, 1578.8210, 1585.8214, 1594.7250, 1604.8951, 1614.7170, 1623.9727, 1630.8551, 1633.8103, 1641.7511, 1649.8939, 1658.7173, 1662.6328, 1675.8419, 1690.0814, 1696.7715, 1707.6700, 1715.7556, 1726.6863, 1730.6455, 1745.7834, 1748.6393, 1752.7344, 1760.8108, 1765.6421, 1766.6444, 1774.9370, 1777.6445, 1780.7063, 1794.6869, 1809.6211, 1838.7883, 1851.8027, 1862.8790, 1890.9158, 1898.7002, 1914.7412, 1922.8712, 1931.8335, 1940.8231, 1948.8146, 1965.7617, 1974.1514, 1979.7971, 1987.5942, 1993.8386, 2002.0570, 2005.3762, 2008.8153, 2017.9470, 2025.8297, 2034.3954, 2038.7740, 2050.8701, 2064.8669, 2081.9338, 2092.2397, 2096.9187, 2105.9019, 2121.9187, 2132.7913, 2135.9861, 2149.9612, 2163.9392, 2166.9558, 2190.0339, 2193.9280, 2201.9492, 2207.9683, 2221.0078, 2225.0061, 2232.9810, 2249.9648, 2263.0054, 2265.0557, 2276.0059, 2280.1675, 2282.0830, 2284.0618, 2298.0662, 2307.0347, 2320.0122, 2342.8975, 2359.1025, 2367.1211, 2381.0784, 2383.8794, 2397.5146, 2398.9719, 2419.1719, 2435.1367, 2446.1436, 2448.1238, 2457.2017, 2475.0093, 2482.1299, 2487.1348, 2500.2129, 2503.1689, 2525.1509, 2541.1997, 2565.2629, 2582.2622, 2606.2097, 2611.2839, 2637.2563, 2648.4082, 2652.3657, 2666.4287, 2670.2876, 2681.8223, 2701.3420, 2704.2839, 2707.5042, 2717.2385, 2746.5510, 2757.5396, 2765.5500, 2780.5847, 2791.4546, 2806.5076, 2831.3921, 2872.6267, 2889.6570, 2898.7937, 2921.8127, 2924.6589, 2931.7559, 2949.6580, 2961.9478, 2975.7747, 2989.8079, 2999.9150, 3005.9878, 3039.5500, 3052.9690

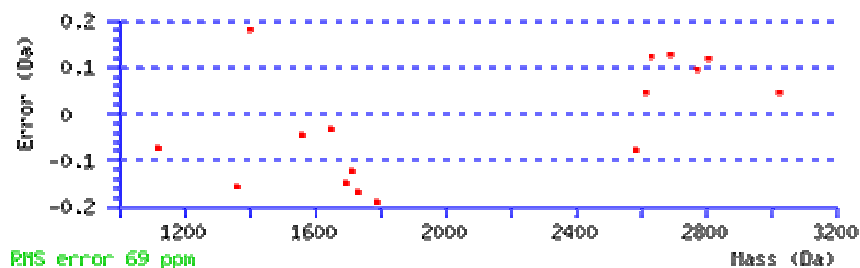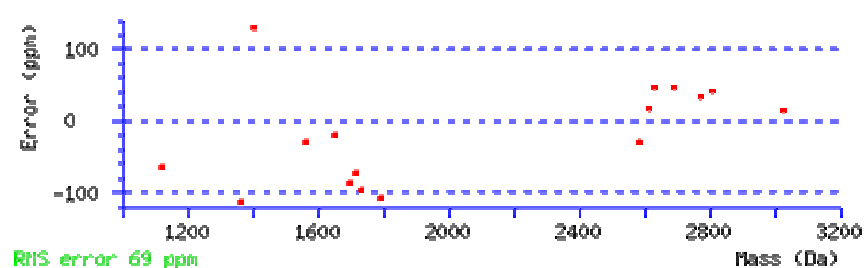

**53 Pyruvate kinase isozymes M1/M2**

Number of mass values searched: **200**

Number of mass values matched: **15**

Sequence Coverage: **38%**

Matched peptides shown in **Bold Red**

1 MPKPHSEAGT AFIQTQQLHA AMADTFLEHM CRLDIDSAPI  
TARNTGICT

**51** IGPASR**SVEM LKEMIKSGMN VAR**LNFSHGT HEYHAETIKN VREATESFAS

**101** DPILYRPVAV ALDTKGPEIR TGLIK**GSGTA EVELKK**GATL KITLDNAYME

**151** KCDENILWLD YKNICKVVEV GSKIYVDDGL ISLQVKEK**GA DFLVTEVENG**

**201** **GSLGSK****GVN LPGAAVDLPA VSEKDIQDLK FGVEQDVMV FASFIR**KAAD

**251** VHEVRKVLGE KGKNIKISK IENHEGVR**RF DEILEASDGI MVAR**GDLGIE

**301** IPAQKVFLLAQ KMMIGR**CNRA GKPVICATQM LESMIK**KPRP TR**AEGSDVAN**

**351** **AVLDGADCIM LSGETAKGDY PLEAVR**MQHL IAREAEAAIY HLQLFEELRR

**401** LAPITSDPTE AA**AVGAVEAS FKCCSGAIV LTKSGRSAHQ VARYRPR**API

**451** **IAVTRNPQTA RQAHLR****GIF PVLCKDAVLN AWAEDVDLRV NLAMDVGKAR**

**501** GFFKKGDVVI VLTGWRPGSG FTNTMRVVPV P

| Start - End      | Observed         | Mr(expt)         | Mr(calc)         | Delta          | Miss     | Sequence                                           |
|------------------|------------------|------------------|------------------|----------------|----------|----------------------------------------------------|
| <b>57 - 66</b>   | <b>1207.4923</b> | <b>1206.4850</b> | <b>1206.6352</b> | <b>-0.1502</b> | <b>1</b> | <b>R.SVEMLKEMIK.S</b>                              |
| <b>63 - 73</b>   | <b>1251.4513</b> | <b>1250.4440</b> | <b>1250.6111</b> | <b>-0.1671</b> | <b>1</b> | <b>K.EMIKSGMNVAR.L</b> Oxidation (M)               |
| <b>126 - 136</b> | <b>1118.4961</b> | <b>1117.4888</b> | <b>1117.5979</b> | <b>-0.1091</b> | <b>1</b> | <b>K.GSGTAEVELKK.G</b>                             |
| <b>189 - 206</b> | <b>1779.6770</b> | <b>1778.6697</b> | <b>1778.8687</b> | <b>-0.1989</b> | <b>0</b> | <b>K.GADFLVTEVENGGSLGSK.K</b>                      |
| <b>208 - 230</b> | <b>2349.1299</b> | <b>2348.1226</b> | <b>2348.2587</b> | <b>-0.1361</b> | <b>1</b> | <b>K.GVNLPGAAVDLPAVSEKDIQDLK.F</b>                 |
| <b>231 - 246</b> | <b>1859.7708</b> | <b>1858.7635</b> | <b>1858.8924</b> | <b>-0.1289</b> | <b>0</b> | <b>K.FGVEQDVMVFASFIR.K</b>                         |
| <b>279 - 294</b> | <b>1837.8109</b> | <b>1836.8036</b> | <b>1836.9040</b> | <b>-0.1004</b> | <b>1</b> | <b>R.RFDEILEASDGIMVAR.G</b> Oxidation (M)          |
| <b>280 - 294</b> | <b>1665.7219</b> | <b>1664.7146</b> | <b>1664.8080</b> | <b>-0.0933</b> | <b>0</b> | <b>R.FDEILEASDGIMVAR.G</b>                         |
| <b>317 - 336</b> | <b>2307.0449</b> | <b>2306.0376</b> | <b>2306.1367</b> | <b>-0.0991</b> | <b>1</b> | <b>R.CNRAGKPVICATQMLESMIK.K</b>                    |
| <b>343 - 367</b> | <b>2510.1353</b> | <b>2509.1280</b> | <b>2509.1312</b> | <b>-0.0032</b> | <b>0</b> | <b>R.AEGSDVANAVLDGADCIMLSGETAK.G</b> Oxidation (M) |
| <b>368 - 376</b> | <b>1019.5742</b> | <b>1018.5669</b> | <b>1018.5083</b> | <b>0.0586</b>  | <b>0</b> | <b>K.GDYPLEAVR.M</b>                               |
| <b>448 - 461</b> | <b>1507.8638</b> | <b>1506.8565</b> | <b>1506.8630</b> | <b>-0.0065</b> | <b>1</b> | <b>R.APIIAVTRNPQTA.R</b>                           |
| <b>468 - 489</b> | <b>2501.2148</b> | <b>2500.2075</b> | <b>2500.2784</b> | <b>-0.0709</b> | <b>1</b> | <b>R.GIFPVLCKDAVLNAWAEDVDLR.V</b>                  |
| <b>490 - 500</b> | <b>1173.5060</b> | <b>1172.4987</b> | <b>1172.6336</b> | <b>-0.1348</b> | <b>1</b> | <b>R.VNLAMDVGKAR.G</b>                             |
| <b>490 - 500</b> | <b>1189.4707</b> | <b>1188.4634</b> | <b>1188.6285</b> | <b>-0.1651</b> | <b>1</b> | <b>R.VNLAMDVGKAR.G</b> Oxidation (M)               |

No match to: 905.5579, 912.3720, 915.3774, 921.3270, 927.5601, 931.5862, 939.3342, 948.5007, 951.5801, 958.5265, 963.5306, 969.5731, 973.5755, 982.4802, 985.5502, 995.5942, 1001.5516, 1002.5639, 1029.5256, 1031.5265, 1034.1091, 1045.5581, 1053.0784, 1058.5199, 1065.9911, 1072.0366, 1074.5012, 1081.9922, 1088.0109, 1089.5045, 1103.9604, 1106.4758, 1108.4277, 1125.4558, 1132.4861, 1140.4948, 1146.5088, 1153.4963, 1164.4838, 1179.4923, 1193.4980, 1201.5090, 1218.4343, 1232.4546, 1233.4484, 1245.4670, 1260.9374, 1276.9020, 1277.5348, 1285.3883, 1292.8615, 1302.5051, 1309.4600, 1316.5068, 1320.3971, 1329.4380, 1339.5127, 1350.4636, 1359.4396, 1365.4244, 1372.4495, 1379.4745, 1383.4628, 1393.5258, 1410.6227, 1421.6055, 1425.6672, 1434.7424,



1436.7808, 1443.6707, 1452.7322, 1459.7655, 1469.8582, 1475.7764, 1487.8125, 1489.8527, 1517.7849, 1524.7772, 1531.8401, 1540.8643, 1547.7740, 1549.8524, 1555.8168, 1562.8162, 1571.7753, 1578.8185, 1587.7440, 1593.7454, 1595.7518, 1604.8330, 1614.7545, 1633.7821, 1638.7836, 1651.7461, 1657.7185, 1675.7900, 1678.7869, 1686.8693, 1695.7687, 1699.7267, 1707.6636, 1716.7412, 1731.7173, 1735.7056, 1743.7732, 1750.6868, 1762.6942, 1765.6320, 1791.6216, 1794.6859, 1807.7894, 1813.7638, 1821.6932, 1842.5758, 1851.7924, 1867.7698, 1877.7422, 1884.6360, 1911.7510, 1927.7721, 1939.7808, 1949.8105, 1965.8982, 1979.8060, 1986.7889, 1993.8228, 2007.8472, 2017.8093, 2022.8611, 2030.8441, 2037.8341, 2045.8777, 2050.8418, 2064.8618, 2073.8149, 2081.8416, 2095.9038, 2104.8564, 2121.9177, 2135.9751, 2149.9385, 2158.8411, 2167.9253, 2185.9480, 2195.9453, 2220.9941, 2225.0017, 2233.9705, 2239.0244, 2248.9866, 2257.9551, 2264.0085, 2277.0325, 2282.0659, 2284.0566, 2298.0757, 2319.0613, 2329.0649, 2339.9595, 2367.1631, 2399.0083, 2418.0999, 2421.1333, 2446.1428, 2448.1279, 2457.1838, 2481.1335, 2487.1240, 2527.1389, 2564.3049, 2584.2148, 2627.3506, 2642.2517, 2652.3274, 2662.3464, 2691.4868, 2705.2676, 2717.2334, 2733.2673, 2780.5774, 2808.4836, 2823.5737, 2872.6226, 2895.6538, 2932.7971

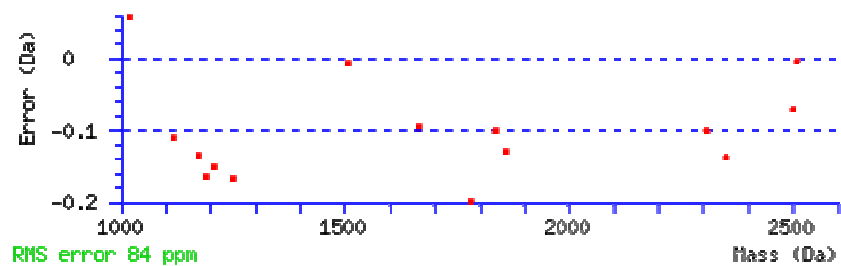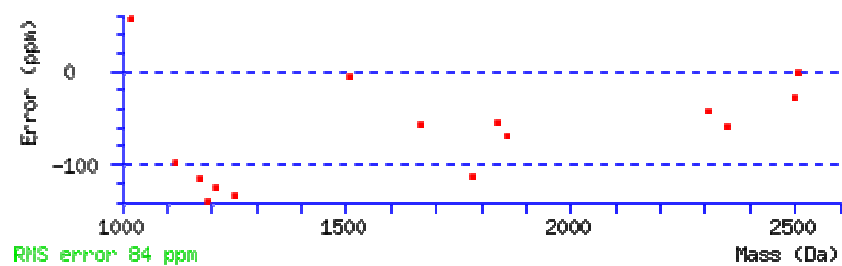

**56 Ornithine aminotransferase, mitochondrial**

Number of mass values searched: **75**

Number of mass values matched: **8**

Sequence Coverage: **20%**

Matched peptides shown in **Bold Red**

1 MLSKLASLQT IAALRR**GVHT SVASATSVAT KKTEQGPPSS EYIFER**ESK'  
51 **GAHNYHPLPV ALER**GKGIYM **WDVEGR**QYFD FLSAYGAVSQ GHCHPKIIDA  
101 MKSQVDKLTLSRAFYNNVL GEYEEYITKL FNYNKVLPMM TGVEAGETAC  
151 KLARR**WGYTV KGIQK**YKAKI VFADGNFWGR TLSAISSSTD PTSYDGFPGPF  
201 MPGFETIPYN DLPALERALQ DPNVAAFMVE PIQGEAGVIV PDPGYLTGVR  
251 ELCTR**HQVLF IADEIQTGLA RT**GRWLAVDH ENVRPDMVLL GKALSGGLYP  
301 VSAVLCDDDEI MLTIKPGEHG STYGGNPLGC RIAIAALEVL EEENLAENAD  
351 KMGAILRKEL MKLPSDVVTS VRGKGLLNAI VIRETKDCDA WKVCLRLRDN  
401 GLLAKPTHGD IIRLAPPLVI KEDEIR**ESVE IINK**TILSF

| Start - End | Observed  | Mr(expt)  | Mr(calc)  | Delta   | Miss | Sequence                     |
|-------------|-----------|-----------|-----------|---------|------|------------------------------|
| 16 - 31     | 1571.7911 | 1570.7838 | 1570.8427 | -0.0589 | 1    | R.RGVHTSVASATSVATK.K         |
| 33 - 46     | 1639.6893 | 1638.6820 | 1638.7525 | -0.0705 | 0    | K.TEQGPPSSEYIFER.E           |
| 50 - 64     | 1736.7644 | 1735.7571 | 1735.8794 | -0.1223 | 0    | K.YGAHNYHPLPVALER.G          |
| 67 - 76     | 1225.4320 | 1224.4247 | 1224.5597 | -0.1350 | 0    | K.GIYMWDVEGR.Q               |
| 67 - 76     | 1241.4495 | 1240.4422 | 1240.5547 | -0.1124 | 0    | K.GIYMWDVEGR.Q Oxidation (M) |
| 156 - 165   | 1179.4891 | 1178.4818 | 1178.6448 | -0.1630 | 1    | R.WGYTVKGIQK.Y               |
| 256 - 271   | 1810.8285 | 1809.8212 | 1809.9737 | -0.1525 | 0    | R.HQVLFIADEIQTGLAR.T         |
| 427 - 434   | 931.5608  | 930.5535  | 930.5022  | 0.0513  | 0    | R.ESVEIINK.T                 |

No match to: 911.0968, 917.4144, 921.4565, 937.4077, 945.5325, 948.4932, 957.3528, 965.4413, 973.6011, 985.5302, 1000.5397, 1002.5543, 1031.5203, 1034.1448, 1052.0988, 1058.5143, 1066.0681, 1082.0474, 1084.0359, 1089.5038, 1106.4462, 1108.4297, 1118.4799, 1141.4503, 1147.5315, 1193.5107, 1201.4023, 1217.3750, 1233.4469, 1265.4945, 1277.5334, 1300.3544, 1307.4767, 1320.3701, 1329.4852, 1339.5122, 1353.6067, 1365.4185, 1383.4868, 1436.7731, 1475.7871, 1489.8932, 1507.8639, 1549.8484, 1555.8401, 1578.8240, 1585.6797, 1595.7689, 1604.8741, 1653.7413, 1699.7673, 1707.6947, 1716.7740, 1766.6769, 1791.6146, 1837.8477, 1993.8596, 2171.9204, 2225.0740, 2283.0945, 2297.0774, 2383.9084, 2448.1599, 2487.2109, 2510.1868, 2642.2224, 2705.3167

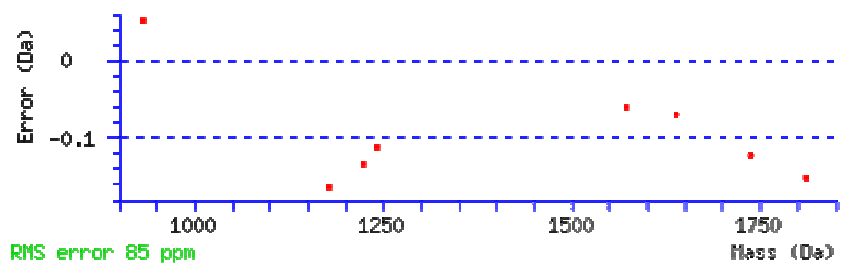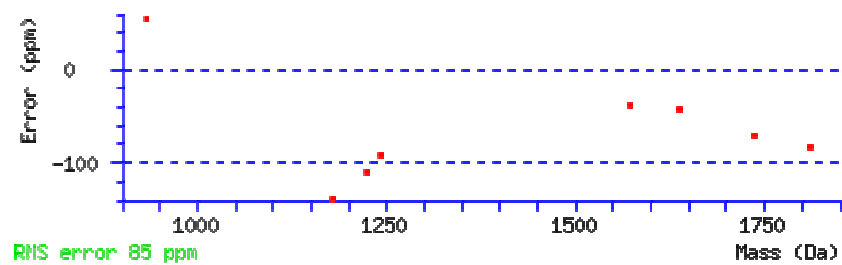

**57 Transcobalamin-2**

Number of mass values searched: **80**

Number of mass values matched: **11**

Sequence Coverage: **36%**

Matched peptides shown in **Bold Red**

1 MELLKALLLL SGVFGALAEF CVIPRIDSQL VEKLGQRLLP **WMDRLSSEIQI**  
51 **NPSVFGVGLR**L SSMQAGTKED LYLHSLK**IHY QQCLLR**STSS DDNSSCQPKL  
101 **SGGSLALYLL ALR**ANCEFFG SRKGDRLISQ LKWFLDEDEK AIGHNHEGHP  
151 NTNYYQYGLS ILALCVHQKR LHDSVVGKLL YAVEHDYFTY QGHVSVDETEA  
201 MAGLALTCLE **RFNFN**SDLRP **RIT**MAIETVR EKILKSQAPE GYFGNIYSTP  
251 LALQMLMTSP ASGVGLGTAC IKAGTSLLLS LQDGAQFNPL MISQLLPILN  
301 **HKTYLDLIFP DCQASR**VMLV PAVEDPVHIS EVISVTLK**VA SALS**PYEQTF  
351 **FVFAGSSLED VLKLAQDGGG** FTYGTQASLS GPYLTSVLGK DAGDREYWQL  
401 **LRAPDTPLLQ GIADYKPDG** ETIELRLVLRW

Start - End Observed Mr(expt) Mr(calc) Delta Miss Sequence

**38 - 44 930.5723 929.5650 929.4793 0.0857 0 R.LLPWMDR.L**  
**38 - 44 946.5587 945.5514 945.4742 0.0772 0 R.LLPWMDR.L** Oxidation (M)  
**45 - 59 1645.8160 1644.8087 1644.8835 -0.0748 0 R.LSSEQLNPSVFGVGLR.L**  
**78 - 86 1230.5042 1229.4969 1229.6339 -0.1370 0 K.IHYQQCLLR.S**  
**100 - 113 1446.8682 1445.8609 1445.8606 0.0004 0 K.LSGGSLALYLLALR.A**  
**212 - 221 1265.4708 1264.4635 1264.6313 -0.1677 0 R.FNFN**SDLRPR.I  
**303 - 316 1698.7258 1697.7185 1697.8083 -0.0898 0 K.TYLDLIFPDCQASR.V**  
**339 - 363 2705.2981 2704.2908 2704.3636 -0.0728 0 K.VASALSPYEQTFFVFAGSSLEDVLK.L**  
**364 - 390 2688.4548 2687.4475 2687.3443 0.1032 0 K.LAQDGGGFTYGTQASLSGPYLTSVLGK.D**  
**391 - 402 1521.7526 1520.7453 1520.7372 0.0082 1 K.DAGDREYWQLLR.A**  
**403 - 426 2640.4170 2639.4097 2639.3442 0.0655 0 R.APDTPLLQGIADYKPDGETIELR.L**

No match to: 902.5616, 913.5627, 919.5359, 959.5403, 985.5684, 989.5574, 1002.5692, 1034.1327, 1058.5283, 1066.0511, 1089.4982, 1106.4886, 1118.5043, 1142.5051, 1179.4955, 1233.4517, 1307.4865, 1339.5345, 1354.5142, 1383.4689, 1431.6575, 1436.7794, 1475.7841, 1489.8790, 1507.8561, 1531.8314, 1549.8329, 1555.8179, 1571.7671, 1577.8094, 1595.7369, 1604.8289, 1609.7465, 1634.8208, 1659.8148, 1669.7787, 1707.6808, 1716.7548, 1750.7217, 1766.6665, 1780.6917, 1794.6960, 1837.8201, 1890.8369, 1940.8048, 1993.8467, 2063.9385, 2149.9648, 2170.9146, 2192.9651, 2225.0156, 2233.9978, 2239.0391, 2265.0437, 2298.0967, 2310.0710, 2336.0947, 2353.1321, 2367.1621, 2383.9133, 2399.0950, 2421.1677, 2432.1284, 2446.1660, 2448.1528, 2487.1626, 2510.1555, 2654.4265, 2902.6877

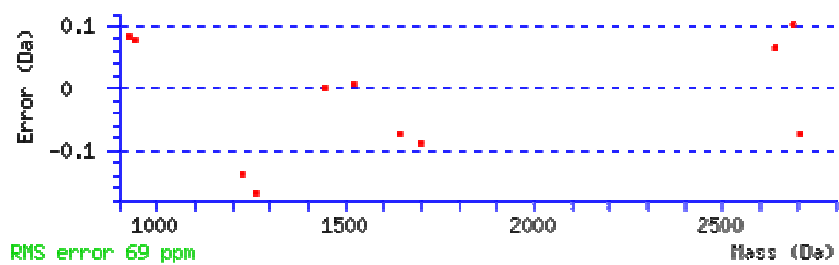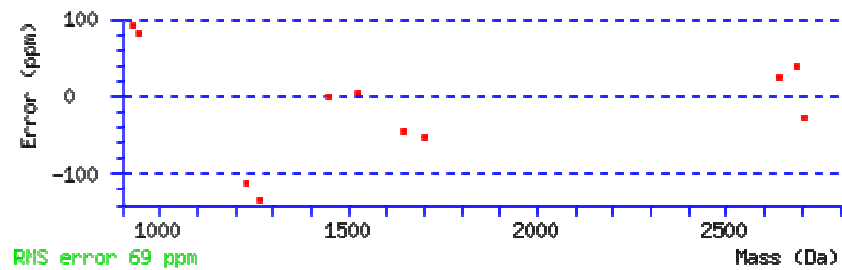

**58 WNT1-inducible-signaling pathway protein 1**

Number of mass values searched: **70**

Number of mass values matched: **6**

Sequence Coverage: **23%**

Matched peptides shown in **Bold Red**

1 MRWLLPWTLA AVAVLRVGNL LATALSPTPT TMTFTPAPLE ETTTRPEFCI  
51 WPCECPQSPP RCPLGVSLIT DGCECKICA QQLGDNCTEA AICDPHRGLY  
101 CDYSGDRPRY AIGVCAQVVG VGCVLDGVRY TNGESFPNC RYNCTCIDGT  
151 VGCTPLCLSP RPPRLWCRQP RHVRVPGQCC EQWVCDDAR RPR**QTALLDT**  
201 **RAFAASGAVE QRY**ENCIAYT SPWSPCSTTC GLGISTRISN VNARCWPEQE  
251 SRLCNLRPCD **VDIQLHIK**AG KK**CLAVYQPE EATNFTLAGC VSTR**TYRPKY  
301 **CGVCTDNRCC IPYK**SKTISV DFQCPEPGPF SR**QVLWINAC FCNLSCR**NPN  
351 DIFADLESYP DFEIIAN

| Start - End | Observed  | Mr(expt)  | Mr(calc)  | Delta   | Miss | Sequence                            |
|-------------|-----------|-----------|-----------|---------|------|-------------------------------------|
| 194 - 201   | 917.3826  | 916.3753  | 916.4978  | -0.1225 | 0    | R.QTALLDTR.A                        |
| 202 - 212   | 1106.4894 | 1105.4821 | 1105.5516 | -0.0695 | 0    | R.AFAASGAVEQR.Y                     |
| 253 - 268   | 1993.8558 | 1992.8485 | 1993.0237 | -0.1752 | 0    | R.LCNLRPCD <b>VDIQLHIK</b> .A       |
| 273 - 294   | 2487.1865 | 2486.1792 | 2486.1570 | 0.0222  | 0    | K.CLAVYQPE <b>EATNFTLAGCVSTR</b> .T |
| 300 - 314   | 1965.8605 | 1964.8532 | 1964.8002 | 0.0531  | 1    | K.YCGVCTDN <b>RCCIPYK</b> .S        |
| 333 - 347   | 1940.8007 | 1939.7934 | 1939.8855 | -0.0921 | 0    | R.QVLWINAC <b>FCNLSCR</b> .N        |

No match to: 985.5701, 1002.5750, 1031.5382, 1034.1294, 1045.5593, 1052.0906, 1058.5236, 1066.0559, 1082.0194, 1089.4966, 1118.4982, 1142.5094, 1179.5035, 1233.4658, 1253.4647, 1267.4690, 1320.3988, 1354.4862, 1436.7767, 1475.7854, 1487.7528, 1501.7434, 1507.8561, 1549.8363, 1555.8276, 1571.7867, 1578.8269, 1604.8339, 1638.7898, 1659.7822, 1691.6597, 1699.7361, 1707.6852, 1716.7626, 1750.7133, 1764.6616, 1766.6750, 1780.6949, 1791.6422, 1794.7053, 1804.7192, 1816.6921, 1838.8135, 1851.8094, 1981.8654, 2150.9614, 2167.0063, 2193.9807, 2225.0305, 2234.0144, 2248.9973, 2263.0479, 2281.0757, 2298.1108, 2307.0684, 2320.0820, 2354.1523, 2383.9324, 2399.0229, 2421.1880, 2448.1738, 2502.2192, 2565.2803, 2705.3118

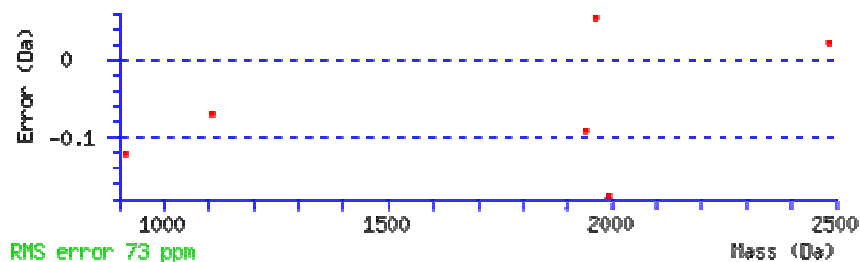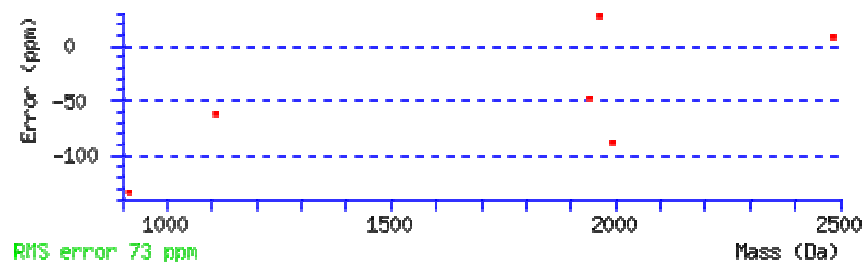

## 60 Alpha-enolase

Number of mass values searched: **75**

Number of mass values matched: **13**

Sequence Coverage: **38%**

Matched peptides shown in **Bold Red**

1 MSILRIHARE IFDSR**GNPTV EVDLYTAK**GL FR**AAVPSGAS TGIYEAL**ELR  
51 DNDKTRFMGK GVSQAVEHIN KTIAPALVSK KVNVEQEKI DKLMIEMDGT  
101 ENKSK**FGANA ILGVSLAVCK** AGAVEKGVPL YRHIADLAGN PEVILPVPAP  
151 NVINGGSHAG NKL**LAMQEFMI LPVGASSFRE** AMRIGAEVYH NLKNVIKEKY  
201 GK**DATNVGDE GGFAPNILEN** KEALELLKTA IAK**AGYTDQV VIGMDVAASE**  
251 **FYR**SGKYDLD FKSPDDPSRY **ITPDQLADLY** KSFVQNYPPV SIEDPFDQDD  
301 WGAWQK**FTAS AGIQVVGDDL TVTNPK**RIAK AASEKSCNCL LLKVNQIGSV  
351 TESLQACKLA QSNWGWGMVS HRS**GETEDTF IADLVVGLCT GQIK**TGAPCR  
401 SER**LAKYNQI LR**IEEELGSK AKFAGRSFRN PLAK

Start - End Observed Mr(expt) Mr(calc) Delta Miss Sequence

**16 - 28 1406.5726 1405.5653 1405.7089 -0.1436 0 R.GNPTVEVDLYTAK.G**  
**33 - 50 1804.8112 1803.8039 1803.9366 -0.1327 0 R.AAVPSGASTGIYEAL**ELR.D  
**106 - 120 1519.8181 1518.8108 1518.8228 -0.0120 0 K.FGANAILGVSLAVCK.A**  
**163 - 179 1896.8151 1895.8078 1895.9637 -0.1559 0 K.LAMQEFMILPVGASSFR.E**  
**163 - 179 1912.7683 1911.7610 1911.9587 -0.1976 0 K.LAMQEFMILPVGASSFR.E** Oxidation (M)  
**163 - 179 1928.7972 1927.7899 1927.9536 -0.1637 0 K.LAMQEFMILPVGASSFR.E** 2 Oxidation (M)  
**203 - 221 1960.7731 1959.7658 1959.9174 -0.1516 0 K.DATNVGDEGGFAPNILEN**K.E  
**234 - 253 2191.9026 2190.8953 2191.0256 -0.1303 0 K.AGYTDQVVIGMDVAASEFYR.S**  
**234 - 253 2207.9109 2206.9036 2207.0205 -0.1169 0 K.AGYTDQVVIGMDVAASEFYR.S** Oxidation (M)  
**270 - 281 1439.7141 1438.7068 1438.7344 -0.0276 0 R.YITPDQLADLYK.S**  
**307 - 326 2032.9005 2031.8932 2032.0477 -0.1545 0 K.FTASAGIQVVGDDLT**VTNPK.R  
**373 - 394 2353.0608 2352.0535 2352.1519 -0.0984 0 R.SGETEDTFIADLVVGLCTGQIK.T**  
**404 - 412 1118.5034 1117.4961 1117.6607 -0.1646 1 R.LAKYNQILR.I**

No match to: 909.0877, 917.3311, 931.5867, 985.5668, 996.6185, 1002.5718, 1028.1228, 1031.5374, 1034.1271, 1052.0852, 1058.5265, 1066.0487, 1084.4711, 1089.5051, 1106.4932, 1142.5096, 1165.6324, 1179.4968, 1191.4871, 1233.4519, 1260.9470, 1276.9103, 1307.4811, 1320.3915, 1339.5269, 1354.4679, 1383.4606, 1425.6575, 1436.7729, 1475.7726, 1489.8774, 1507.8507, 1531.8170, 1542.7340, 1549.8320, 1555.8085, 1571.7721, 1578.8134, 1585.7230, 1593.7428, 1604.8236, 1634.7675, 1707.7039, 1716.7488, 1766.6521, 1791.6200, 1794.6837, 1818.8224, 1838.7930, 1940.7949, 1993.8386, 2224.9866, 2233.9607, 2248.9570, 2266.9888, 2298.0635, 2326.0564, 2383.8772, 2447.1123, 2487.1255, 2503.1255, 2705.2502

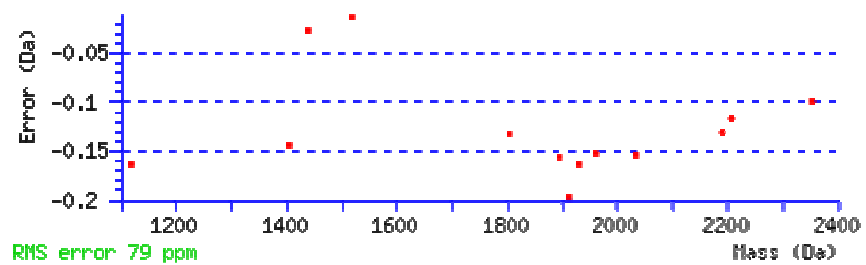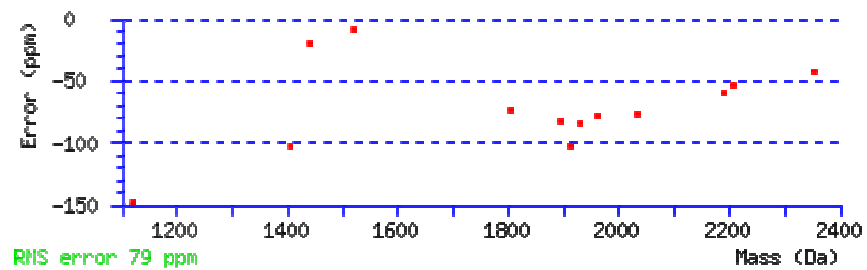



## 5 Rab GTPase-binding effector protein 2

Number of mass values searched: **100**

Number of mass values matched: **14**

Sequence Coverage: **19%**

Matched peptides shown in **Bold Red**

1 MAAAPATLAL DPQPQEK**QKD ASESSELSRL RAELAGALAE METMKAVAEV**  
51 **SESTK**AEAVA AVQRQCQEEV ASLQAILKDS ISSYETQIAA LKQER**QQQQQ**  
101 **DFEEKDRE**ELG HLKQLLAR**AH PLDSLEKQME** KAHEDSEKLR EIVLPMEQEI  
151 TELKQKLRQA EELIQEIQR PRQPASLHGS TELLPLSRNP SPPLPLEEP  
201 SGDAGPAAEA FAHNCDDSAS ISSFSLGGAA GSASLRGPQG LSPEQEETAS  
251 LVSTGTLVPE GIFLPPGYQ LVPDSQWEQL QVEGRQLQK**E LESVSRERDE**  
301 **LQEGLRRSNE DCAK**QMQVLL AQVQNSEQLL RTLQGTVSQA QERVQLQMAE  
351 LATSHKCLSQ EVKRLNEENQ GLRAEQLPSS ALQGSEQRED QDEALPSSIQ  
401 ELHLLVQNTR QQAR**ARQQAQ EHEAER**LRIE IVKLREALDE ETAAKASLER  
451 QLRVQREETD VLEASLCSLR IETERVQEQ RKAQLTDLLS EQRAKTLRLQ  
501 AELETSEQVQ RDFVRLSQAL QVRLERIRQA ETLQQVRS**SIL DEAPLR**DIRD  
551 IKDS

| Start - End | Observed  | Mr(expt)  | Mr(calc)  | Delta   | Miss | Sequence                                  |
|-------------|-----------|-----------|-----------|---------|------|-------------------------------------------|
| 18 - 29     | 1336.5142 | 1335.5069 | 1335.6266 | -0.1197 | 1    | <b>K.QKDASESSELSR.L</b>                   |
| 20 - 29     | 1080.5571 | 1079.5498 | 1079.4731 | 0.0768  | 0    | <b>K.DASESSELSR.L</b>                     |
| 32 - 45     | 1480.8241 | 1479.8168 | 1479.6949 | 0.1220  | 0    | <b>R.AELAGALAEMETMK.A</b> Oxidation (M)   |
| 32 - 45     | 1496.8279 | 1495.8206 | 1495.6898 | 0.1308  | 0    | <b>R.AELAGALAEMETMK.A</b> 2 Oxidation (M) |
| 32 - 55     | 2466.2217 | 2465.2144 | 2465.2029 | 0.0115  | 1    | <b>R.AELAGALAEMETMKAVAEVSESTK.A</b>       |
| 96 - 105    | 1307.5134 | 1306.5061 | 1306.5789 | -0.0728 | 0    | <b>R.QQQQDFEEK.D</b>                      |
| 96 - 107    | 1578.8236 | 1577.8163 | 1577.7070 | 0.1093  | 1    | <b>R.QQQQDFEEKDR.E</b>                    |
| 119 - 131   | 1541.8164 | 1540.8091 | 1540.7555 | 0.0536  | 1    | <b>R.AHPLDSLEKQMEK.A</b> Oxidation (M)    |
| 290 - 298   | 1104.5511 | 1103.5438 | 1103.5571 | -0.0132 | 1    | <b>K.ELESVSRER.D</b>                      |
| 299 - 306   | 959.5834  | 958.5761  | 958.4720  | 0.1042  | 0    | <b>R.DELQEGLR.R</b>                       |
| 299 - 307   | 1115.5522 | 1114.5449 | 1114.5731 | -0.0281 | 1    | <b>R.DELQEGLRR.S</b>                      |
| 307 - 314   | 979.5790  | 978.5717  | 978.4189  | 0.1529  | 1    | <b>R.RSNEDCAK.Q</b>                       |
| 415 - 426   | 1452.7908 | 1451.7835 | 1451.6865 | 0.0970  | 1    | <b>R.ARQQAQEHEAER.L</b>                   |
| 538 - 546   | 1013.5736 | 1012.5663 | 1012.5553 | 0.0110  | 0    | <b>R.SILDEAPLR.D</b>                      |

No match to: 901.6014, 908.5963, 911.6083, 913.5970, 916.5970, 923.5925, 926.5950, 929.5991, 935.5974, 939.5944, 941.5908, 943.5884, 949.5951, 953.5880, 956.5874, 971.5907, 973.5805, 982.5854, 985.5803, 987.5812, 996.6010, 1000.5738, 1002.5769, 1010.5771, 1016.5707, 1022.5733, 1028.5712, 1031.5640, 1041.5675, 1044.5680, 1055.5697, 1058.5509, 1064.5608, 1071.5552, 1074.5560, 1086.5542, 1089.5458, 1101.5529, 1118.5486, 1124.5465, 1133.5497, 1144.5464, 1147.5463, 1158.5385, 1161.5376, 1167.5532, 1175.5359, 1179.5181, 1191.5311, 1203.5331, 1206.5354, 1219.5264, 1233.4867, 1246.5271, 1249.5193, 1263.5223, 1274.5203, 1278.5248, 1293.5208, 1322.5081, 1350.5068, 1365.5078, 1379.5233, 1394.5763, 1409.6504, 1423.7136, 1436.7640, 1468.8094,

1489.8556, 1507.8525, 1523.8334, 1549.8412, 1555.8278, 1571.7988, 1597.8123, 1604.8240, 1612.8202, 1626.8202, 1655.8142, 1670.8220, 1724.8314, 1794.7355, 2211.0173, 2421.1880, 2448.1516, 2464.2212

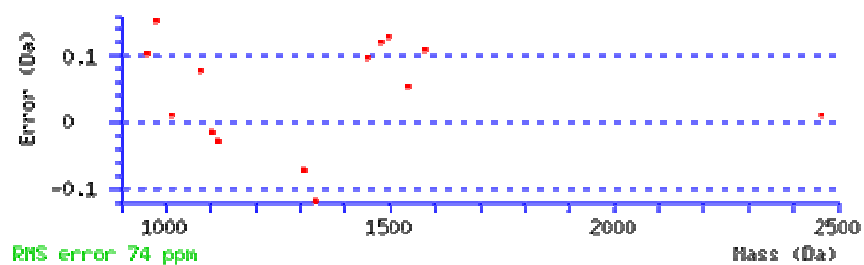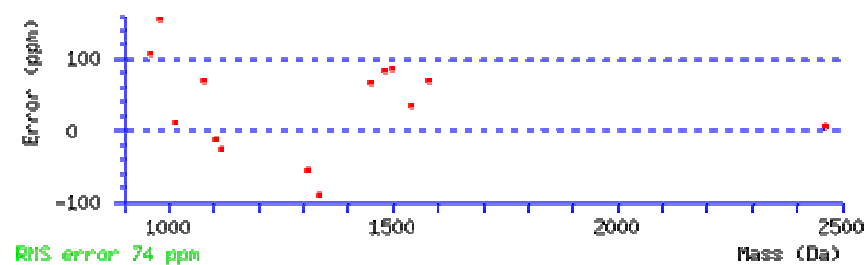

## 9 SPARC

Number of mass values searched: **100**

Number of mass values matched: **13**

Sequence Coverage: **41%**

Matched peptides shown in **Bold Red**

1 MRAWIFFLLC LAGRALAAPQ QTEVAEEIVE EETVVEETGV PVGANPVQVE  
51 MGEFEDGAE TVEEVVADNP CQNHCKHGK VCELDENPT MCVCQDPTSC  
101 PAPIGEFEKV CSNDNK**TFDS SCHFFATK**CT LEGTKKGHL **HLDYIGPKY**  
151 **IAPCLDSELT EFPLRMRDWL KNLVTLYER DEGNLLTEK** QKLRVKKIHE  
201 **NEKRLEAGDH PVELLARDFE** KNYNMYIFPV HWQFGQLDQH PIDGYLSHTE  
251 LAPLR**APLIP MEHCTTRFE TCDLNDKYI ALEEWAGCFG IKEQDINKDL**  
301 **VI**

| Start - End | Observed  | Mr(expt)  | Mr(calc)  | Delta   | Miss | Sequence                              |
|-------------|-----------|-----------|-----------|---------|------|---------------------------------------|
| 117 - 128   | 1447.6532 | 1446.6459 | 1446.6238 | 0.0221  | 0    | <b>K.TFDSSCHFFATK.C</b>               |
| 140 - 149   | 1215.4812 | 1214.4739 | 1214.6118 | -0.1378 | 0    | <b>K.LHLDYIGPK.Y</b>                  |
| 150 - 165   | 1923.8287 | 1922.8214 | 1922.9448 | -0.1234 | 0    | <b>K.YIAPCLDSELTFFPLR.M</b>           |
| 172 - 180   | 1106.5593 | 1105.5520 | 1105.6131 | -0.0611 | 0    | <b>K.NLVTLYER.D</b>                   |
| 172 - 190   | 2220.0437 | 2219.0364 | 2219.1433 | -0.1069 | 1    | <b>K.NLVTLYERDEGNLLTEK.Q</b>          |
| 181 - 190   | 1132.4810 | 1131.4737 | 1131.5408 | -0.0670 | 0    | <b>R.DEGNLLTEK.Q</b>                  |
| 198 - 204   | 925.4833  | 924.4760  | 924.4777  | -0.0017 | 1    | <b>K.IHENEKR.L</b>                    |
| 204 - 217   | 1575.8199 | 1574.8126 | 1574.8529 | -0.0402 | 1    | <b>K.RLEAGDHPVELLAR.D</b>             |
| 205 - 217   | 1419.6805 | 1418.6732 | 1418.7518 | -0.0785 | 0    | <b>R.LEAGDHPVELLAR.D</b>              |
| 256 - 267   | 1441.6879 | 1440.6806 | 1440.6853 | -0.0047 | 0    | <b>R.APLIPMEHCTTR.F</b> Oxidation (M) |
| 268 - 278   | 1403.4789 | 1402.4716 | 1402.5711 | -0.0995 | 0    | <b>R.FFETCDLNDK.Y</b>                 |
| 279 - 292   | 1656.7356 | 1655.7283 | 1655.8017 | -0.0734 | 0    | <b>K.YIALEEWAGCFGIK.E</b>             |
| 293 - 302   | 1186.5004 | 1185.4931 | 1185.6241 | -0.1310 | 1    | <b>K.EQDINKDLVI.-</b>                 |

No match to: 910.3611, 919.5107, 931.5536, 937.4913, 945.5878, 985.5529, 1002.5766, 1030.5149, 1033.5212, 1045.5642, 1058.5269, 1060.0568, 1066.0675, 1074.4982, 1082.0333, 1089.5042, 1120.5604, 1140.4960, 1157.5037, 1165.4940, 1179.5021, 1193.4934, 1200.4890, 1233.4744, 1235.4205, 1265.4823, 1270.9232, 1277.5182, 1293.4486, 1307.4767, 1320.4026, 1339.5132, 1350.4679, 1354.4539, 1365.4092, 1377.4629, 1393.5410, 1426.6539, 1433.7394, 1469.8413, 1475.7811, 1489.8552, 1493.7582, 1507.8538, 1523.7972, 1531.8514, 1549.8488, 1556.8557, 1571.7903, 1589.8060, 1604.8239, 1638.7949, 1670.7362, 1681.7800, 1699.7418, 1707.6860, 1716.7609, 1740.6824, 1760.7761, 1766.6753, 1778.7019, 1791.6323, 1808.7672, 1837.8093, 1851.8047, 1867.7996, 1880.8021, 1937.8408, 1951.8499, 1965.8962, 1993.8539, 2022.9325, 2136.0127, 2149.9685, 2184.9819, 2193.9216, 2201.9749, 2225.0303, 2284.0920, 2298.0957, 2383.9104, 2399.0095, 2421.1680, 2448.1448, 2501.2595, 2705.3171, 2717.2563

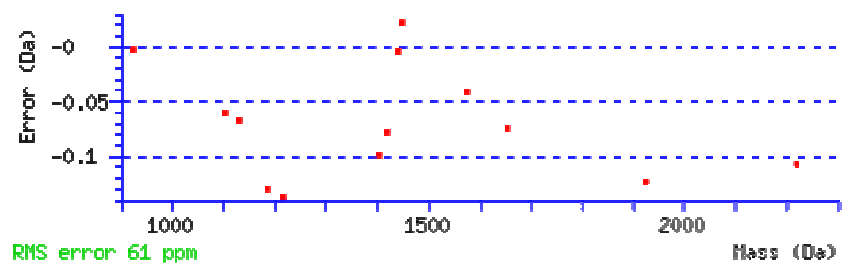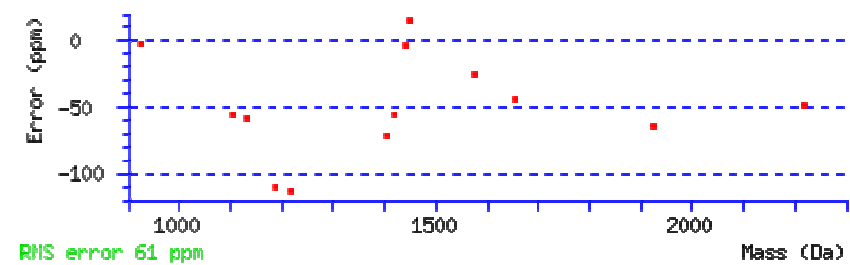

**25 T-complex protein 1 subunit theta**

Number of mass values searched: **100**

Number of mass values matched: **11**

Sequence Coverage: **27%**

Matched peptides shown in **Bold Red**

1 MALHVPKAPG FAQMLKDGAK HFSGLEEAVY RNIQACK**ELA QTTRTAYGPN**  
51 **GMNK**MVINRL EKLFVTNDAA TILRELEVQH PAAKMIVMAS HMQEQEVGDG  
101 TNFVLVFAGA LLELAEELLR IGLSVSEVIS GYEIACKKAH EILPELVCCS  
151 AK**NLRDVDEV SLLR**TSIMS **KQYGSETFLA** KLIAQACVSI FPDSGNFNVD  
201 NIRVCK**ILGS GIYSSSVLHG MVFKK**ETEGD VTSVKDAK**IA VYSCPF**DGMI  
251 **TETK**GTVLIK **TAEELMNFSK** **GEENLMDAQV** KAIAGTGANV IVTGGKVADI  
301 ALHYANKYNI MLVRL**LNSKWD LR**RLCKTVGA TALPKLTPPV QEEMGHCDSDV  
351 YLSEVGDTQV VVFKHEKEDG AISTIVLR**GS TDNL**MDDIER AVDDGVTNFK  
401 VLTRDKRLVP GGGATEIELA KQITSYGETC PGLEQYAIKK FAEAFEAIPIR  
451 **ALAENSGVKA NEVISK**LYSV HQEGNKNVGL DIEAEVPAVK **DMLEASILD**T  
501 **YLGK**YWAIKL ATNAAVTVLR VDQIIMAKPA GGPKPPSGKK DWDDDDQND

Start - End Observed Mr(expt) Mr(calc) Delta Miss Sequence

**38 - 54 1851.8053 1850.7980 1850.8945 -0.0964 1 K.ELAQTTRTAYGPNGMNK.M**  
**153 - 165 1515.7573 1514.7500 1514.8053 -0.0552 1 K.NLRDVDEVSSLLR.T**  
**166 - 181 1790.7792 1789.7719 1789.8920 -0.1201 1 R.TSIMSKQYGSETFLAK.L**  
**207 - 225 2022.9390 2021.9317 2022.0972 -0.1655 1 K.ILGSGIYSSSVLHGMVFKK.E**  
**239 - 254 1831.8030 1830.7957 1830.8532 -0.0575 0 K.IAVYSCPFDMITETK.G**  
**261 - 281 2383.9302 2382.9229 2383.1035 -0.1806 1 K.TAEELMNFSKGEENLMDAQVK.A**  
**271 - 281 1233.4745 1232.4672 1232.5707 -0.1035 0 K.GEENLMDAQVK.A**  
**315 - 322 1031.5358 1030.5285 1030.5560 -0.0274 1 R.LNSKWDLR.R**  
**379 - 390 1365.4368 1364.4295 1364.5878 -0.1583 0 R.GSTDNLMDIER.A**  
**451 - 466 1629.7538 1628.7465 1628.8733 -0.1268 1 R.ALAENSGVKANEVISK.L**  
**491 - 504 1584.7797 1583.7724 1583.7753 -0.0028 0 K.DMLEASILDYLGK.Y** Oxidation (M)

No match to: 1003.5593, 1036.5321, 1058.5240, 1070.5293, 1082.5464, 1093.4967, 1107.4875, 1141.5061, 1165.4985, 1179.4943, 1198.5786, 1218.4856, 1241.4500, 1251.4650, 1262.4463, 1300.4155, 1320.4197, 1340.4816, 1357.4745, 1379.4812, 1393.5352, 1410.5914, 1425.6392, 1434.7352, 1438.6882, 1460.7524, 1469.8580, 1481.8358, 1493.7595, 1500.7714, 1507.8469, 1523.7810, 1541.7574, 1549.6768, 1556.7968, 1571.7633, 1598.7333, 1605.7795, 1620.7744, 1638.7886, 1652.8346, 1657.7218, 1667.7076, 1676.7419, 1693.7611, 1707.6902, 1716.7665, 1729.7339, 1742.7738, 1757.7921, 1765.6438, 1774.7615, 1798.8903, 1813.7894, 1843.8252, 1886.8040, 1897.7865, 1905.8560, 1914.8129, 1943.8248, 1953.9305, 1996.8591, 2012.8267, 2039.9054, 2048.9353, 2086.8979, 2095.9363, 2109.0286, 2119.9297, 2136.0205, 2149.9866, 2165.9561, 2181.9910, 2225.0349, 2286.0657, 2297.1021, 2309.0308, 2324.0754, 2342.9497, 2352.0767, 2359.1016, 2418.1216, 2448.1802, 2501.2839, 2565.2673, 2584.2903, 2602.3523, 2643.4299, 2661.4395

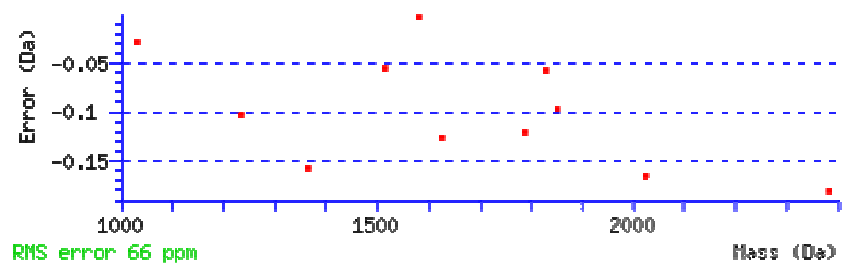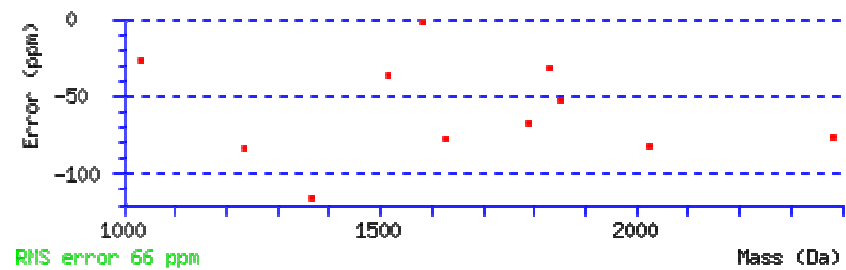

**30 RuvB-like 2**

Number of mass values searched: **200**

Number of mass values matched: **16**

Sequence Coverage: **40%**

Matched peptides shown in **Bold Red**

**1 MATVAATTKV PEIR**DVTRIE RIGAHSHIRG LGLDDALEPR QASQGMVGG  
**51 AARRAAGVVL EMIREGKI**AG RAVLIAGQPG TGKTAIAMGM AQALGPDTPF  
**101 TAIAGSEIFS LEMSKTEALT QAFRRSIGVR IKEETEIEEG EVVEIQIDRP**  
**151 ATGTGSKVGK LTLK****TTEMET IYDLGTKMIE SLTKDKVQAG DVITIDKATG**  
**201 KISKLGRSFT RAR****DYDAMGS QTKFVQCPDG ELQKRKEVVH TVSLHEIDVI**  
**251 NSRTQGFLAL FSGDTGEIKS** EVREQINAKV AEWREEGKAE IIPGVLFIDE  
**301 VHMLDIESFS FLNRALES DM APVLIMATNR GITRIRGTSY QSPHGIPIDL**  
**351 LDRLLIVSTS PYSEKDTKQI LRIRCEEDV EMSEDAYTVL TRIGLETSLR**  
**401 YAIQLITAAS LVCR****KRGTE VQVDDIKRVY SLFLDES**RST QYMKEYQDAF  
**451 LFNELK**GETM DTS

| Start - End      | Observed         | Mr(expt)         | Mr(calc)         | Delta          | Miss Sequence                                     |
|------------------|------------------|------------------|------------------|----------------|---------------------------------------------------|
| <b>1 - 14</b>    | <b>1487.8733</b> | <b>1486.8660</b> | <b>1486.8177</b> | <b>0.0483</b>  | <b>1 -.MATVAATTKVPEIR.D</b>                       |
| <b>22 - 40</b>   | <b>2027.2102</b> | <b>2026.2029</b> | <b>2026.0708</b> | <b>0.1321</b>  | <b>1 R.IGAHSHIRGLGLDDALEPR.Q</b>                  |
| <b>41 - 53</b>   | <b>1316.7916</b> | <b>1315.7843</b> | <b>1315.6667</b> | <b>0.1177</b>  | <b>0 R.QASQGMVQQLAAR.R</b>                        |
| <b>55 - 64</b>   | <b>1058.5217</b> | <b>1057.5144</b> | <b>1057.5954</b> | <b>-0.0810</b> | <b>0 R.AAGVVLEMIR.E</b>                           |
| <b>55 - 64</b>   | <b>1074.5133</b> | <b>1073.5060</b> | <b>1073.5903</b> | <b>-0.0843</b> | <b>0 R.AAGVVLEMIR.E</b> Oxidation (M)             |
| <b>55 - 67</b>   | <b>1372.7850</b> | <b>1371.7777</b> | <b>1371.7544</b> | <b>0.0233</b>  | <b>1 R.AAGVVLEMIREGK.I</b>                        |
| <b>165 - 184</b> | <b>2336.1150</b> | <b>2335.1077</b> | <b>2335.1175</b> | <b>-0.0097</b> | <b>1 K.TTEMETIYDLGTKMIESLTK.D</b> 2 Oxidation (M) |
| <b>185 - 197</b> | <b>1401.7236</b> | <b>1400.7163</b> | <b>1400.7511</b> | <b>-0.0348</b> | <b>1 K.DKVQAGDVITIDK.A</b>                        |
| <b>214 - 234</b> | <b>2433.1726</b> | <b>2432.1653</b> | <b>2432.0624</b> | <b>0.1029</b>  | <b>1 R.DYDAMGSQTKFVQCPDGELQK.R</b> Oxidation (M)  |
| <b>270 - 279</b> | <b>1173.5367</b> | <b>1172.5294</b> | <b>1172.6149</b> | <b>-0.0855</b> | <b>1 K.SEVREQINAK.V</b>                           |
| <b>280 - 288</b> | <b>1103.5406</b> | <b>1102.5333</b> | <b>1102.5407</b> | <b>-0.0074</b> | <b>1 K.VAEWREEGK.A</b>                            |
| <b>393 - 414</b> | <b>2448.1731</b> | <b>2447.1658</b> | <b>2447.3570</b> | <b>-0.1912</b> | <b>1 R.IGLETSLRYAIQLITAASLVCR.K</b>               |
| <b>401 - 414</b> | <b>1578.8206</b> | <b>1577.8133</b> | <b>1577.8599</b> | <b>-0.0466</b> | <b>0 R.YAIQLITAASLVCR.K</b>                       |
| <b>417 - 427</b> | <b>1231.4846</b> | <b>1230.4773</b> | <b>1230.6456</b> | <b>-0.1683</b> | <b>1 R.KGTEVQVDDIK.R</b>                          |
| <b>429 - 438</b> | <b>1228.5110</b> | <b>1227.5037</b> | <b>1227.6135</b> | <b>-0.1098</b> | <b>0 R.VYSLFLDES.R</b>                            |
| <b>445 - 456</b> | <b>1516.8774</b> | <b>1515.8701</b> | <b>1515.7245</b> | <b>0.1456</b>  | <b>0 K.EYQDAFLFNEK.G</b>                          |

No match to: 906.6078, 909.0865, 914.6265, 916.2983, 922.4907, 925.7141, 931.5969, 937.7024, 940.2978, 946.6080, 949.5988, 951.6268, 957.5974, 964.6725, 969.6749, 971.5829, 977.6147, 983.6754, 985.5594, 996.6179, 1000.5553, 1002.5667, 1016.5475, 1023.1134, 1029.5355, 1031.5231, 1039.0201, 1042.5504, 1044.0773, 1052.6248, 1060.0349, 1066.0449, 1072.0481, 1082.0051, 1088.0314, 1089.5044, 1097.9063, 1106.4188, 1108.4142, 1118.5020, 1124.5782, 1130.5314, 1134.5586, 1141.7251, 1143.5433, 1145.5457, 1152.5195, 1160.5410, 1165.5787, 1174.4579, 1183.5583, 1185.6056, 1189.4918, 1191.5027, 1199.5656, 1209.5385, 1216.4760, 1218.4178, 1233.4385, 1240.5624, 1248.9293, 1255.9584, 1263.6346, 1266.4967, 1270.9019, 1277.9191, 1286.8668, 1292.8718, 1300.5640, 1308.8262, 1322.4458, 1324.8478, 1326.5060, 1337.5200, 1339.5353, 1346.4879, 1353.6975, 1354.5151, 1361.9357, 1363.5455, 1377.4705, 1393.6086, 1411.6547, 1436.7815, 1443.6606,

1452.8087, 1462.8309, 1476.1062, 1489.8798, 1498.1039, 1505.8400, 1507.8555, 1523.8444, 1528.8021, 1531.8513, 1543.1514, 1545.8031, 1549.8446, 1555.8162, 1564.8383, 1571.7719, 1585.7661, 1587.7634, 1594.7642, 1595.7594, 1604.8541, 1618.7174, 1630.8315, 1635.9016, 1649.8280, 1660.8005, 1668.9049, 1676.8124, 1686.9857, 1700.9528, 1704.8070, 1714.7572, 1722.8068, 1742.6992, 1753.5959, 1760.8240, 1766.6642, 1779.9872, 1792.6488, 1801.7775, 1810.9568, 1821.9559, 1833.0458, 1842.9225, 1867.8054, 1873.0009, 1899.1342, 1916.0328, 1931.0531, 1933.8684, 1945.8347, 1953.0615, 1959.8303, 1984.0380, 1988.8518, 1992.1462, 2003.9077, 2012.0997, 2036.9370, 2047.8525, 2065.9192, 2076.8596, 2104.2017, 2122.1345, 2178.0132, 2211.9885, 2246.5503, 2266.0986, 2270.3748, 2279.2241, 2303.5464, 2309.0530, 2317.0740, 2326.2961, 2397.9998, 2418.1851, 2421.1924, 2431.1611, 2446.1821, 2457.0073, 2462.1951, 2473.9895, 2487.1892, 2503.1812, 2519.1753, 2526.1699, 2541.1553, 2563.2354, 2579.3271, 2593.2920, 2609.3350, 2624.2305, 2637.3303, 2652.3350, 2705.4009, 2720.5696, 2749.5464, 2762.0242, 2784.5305

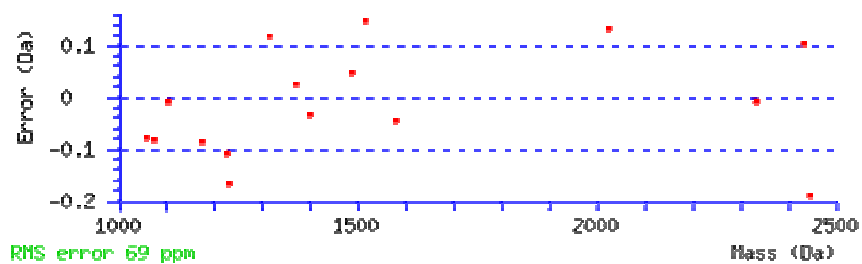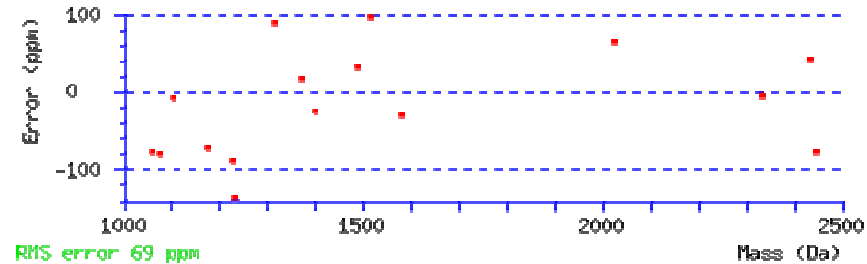



**41 Activator of 90 kDa heat shock protein ATPase homolog 1**

Number of mass values searched: **150**

Number of mass values matched: **12**

Sequence Coverage: **37%**

Matched peptides shown in **Bold Red**

**1 MAKWGEDPR** WIVEERADAT NVNNWHWTER **DASNWSTEKL KTLFLAVRVE**

**51 NEEGKCEVTE VNKLDGEASI NNRKGLIFF** YEWTIKLNWT **GTSKSGVQYK**

**101 GHVEIPNLS** ENSVDEVEIS VSLAKDEPDT NLVALMK**EDG VKLLREAVGI**

**151 YISTLK**TEFT QGMILPTVNG ESDVPVGPQA LKTETCKAKS APSK**SQAKPV**

**201 GVK**IPTCKIT LKETFLTSPE ELYRVFTTQE LVQAFTHAPA ALEADRGGKF

**251 HMVDG**NTGE FTDLVPEK**HI AMKWR**FK**SWP EGHFATITLT FIDK**NGETEL

**301 CMEGR****GIPAP EEERTRQG**WQ RYYFEGIKQT FGYGARLF

**Start - End Observed Mr(expt) Mr(calc) Delta Miss Sequence**

**2 - 10 1015.5742 1014.5669 1014.4883 0.0786 1 M.AKWGEDPR.W**

**31 - 41 1278.5273 1277.5200 1277.6252 -0.1051 1 R.DASNWSTEKLK.T**

**42 - 55 1604.8334 1603.8261 1603.8569 -0.0308 1 K.TLFLAVRVNEEGK.C**

**56 - 73 2047.9399 2046.9326 2046.9640 -0.0314 1 K.CEVTEVKNLDGEASINNR.K**

**87 - 94 906.5762 905.5689 905.4607 0.1082 0 K.LNWTGTSK.S**

**138 - 145 929.5983 928.5910 928.5342 0.0569 1 K.EDGVKLLR.E**

**146 - 156 1193.5236 1192.5163 1192.6703 -0.1540 0 R.EAVGIYISTLK.T**

**195 - 203 913.6227 912.6154 912.5393 0.0762 0 K.SQAKPVGVK.I**

**269 - 275 941.5952 940.5879 940.5065 0.0814 1 K.HIAMKWR.F**

**278 - 294 1962.8792 1961.8719 1961.9887 -0.1168 0 K.SWPEGHFATITLTFIDK.N**

**306 - 314 997.5838 996.5765 996.4876 0.0889 0 R.GIPAPEER.T**

**315 - 321 931.6021 930.5948 930.4784 0.1164 1 R.TRQGWQR.Y**

No match to: 909.5907, 916.5938, 922.6000, 924.6220, 926.6013, 939.5987, 943.5815, 949.5967, 955.6043, 958.5857, 968.6101, 971.5885, 973.5708, 982.5974, 985.5799, 991.5703, 1000.5719, 1002.5784, 1017.5687, 1028.5643, 1031.5570, 1040.5642, 1044.1021, 1052.5680, 1058.5320, 1060.0594, 1066.0696, 1072.5457, 1076.5586, 1082.0332, 1089.5261, 1097.9902, 1104.5459, 1113.5393, 1118.5254, 1128.5336, 1131.5486, 1134.5365, 1145.5571, 1151.5649, 1157.5358, 1160.5452, 1163.5437, 1172.5432, 1175.5276, 1179.5143, 1190.5442, 1201.5153, 1206.5188, 1217.5035, 1221.5360, 1228.5348, 1232.9664, 1233.4756, 1242.5465, 1249.5150, 1256.5280, 1263.4977, 1270.9340, 1286.8984, 1293.5099, 1307.5140, 1322.5100, 1333.5323, 1336.5167, 1339.5321, 1347.5084, 1350.4958, 1353.5195, 1363.5104, 1366.4803, 1377.5381, 1380.5173, 1387.5684, 1393.5811, 1409.6619, 1424.7141, 1436.7832, 1450.8054, 1466.8123, 1476.1346, 1483.8320, 1489.8726, 1496.8254, 1507.8528, 1515.8165, 1523.8359, 1527.8489, 1531.8423, 1541.8180, 1549.8345, 1555.8285, 1564.8086, 1571.7985, 1578.8400, 1587.7819, 1594.8068, 1597.7902, 1615.8030, 1624.7996, 1629.8317, 1638.8127, 1642.7970, 1653.8173, 1661.7976, 1670.8141, 1685.8176, 1698.8105, 1703.8243, 1714.8191, 1726.8649, 1741.8221, 1757.8575, 1773.8569, 1782.8796, 1791.6200, 1800.8601, 1860.8956, 1918.8994, 1932.8867, 1945.9227, 1974.9600, 1991.9756, 2005.9644, 2030.9885, 2094.0022, 2146.0334, 2383.9502, 2398.6130, 2421.2217, 2435.2407, 2446.2107, 2448.1802, 2457.3198, 2462.3325, 2487.2295, 2503.2251, 2636.3940

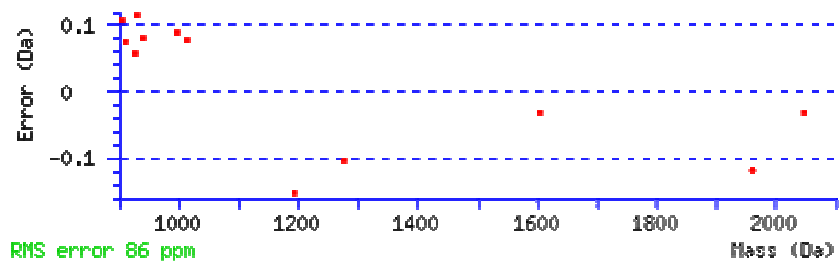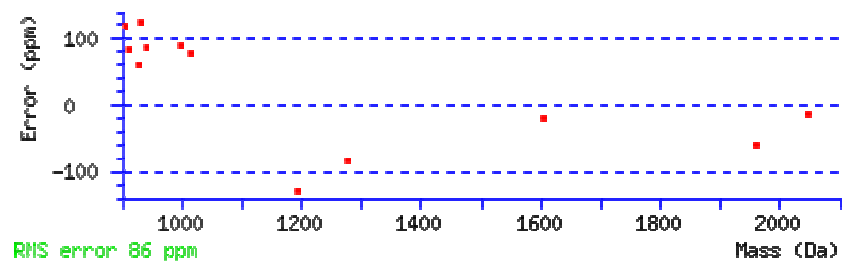

**54 5-azacytidine-induced protein 2**

Number of mass values searched: **120**

Number of mass values matched: **8**

Sequence Coverage: **24%**

Matched peptides shown in **Bold Red**

**1 MDTLVEDDIC ILNHEKAHRR** EAVTPLSAYP GDESVASHFA LVTAYEDIK  
**51 RLKDSEKENS FLKKRIRALE ERLVGARADE ETSSVGR**EQV NKAYHAYREV  
**101 CIDRDNLKNQ LEKINKDNSE SLKMLNEQLQ SKEVELLQLR** TEVETQQVMR  
**151 NLNPPSSSWE VEKLSCDLKI HGLEQELGLL RKECSDLRTE LQKARQTGPP**  
**201 QEDILQGRDV IRPSSLREEH** VPHQGLHHSD NMQHAYWELK REMSNLHLVT  
**251 QVQAELLRKL KTSAAVKKAC TPVGCVEDLG RDSTKLHLTN FTATYKRHPS**  
**301 LSPNGKAPCY APSSPLPGDR KVFSDKAVLQ SWTDNER**LVP NDGADFPEHS  
**351 SYGRNSLEDN SWVFPSPPKS** SETAFGENKS KILPLSNLPP LHYLDQQNQ  
**401 CLYKS**

| Start - End      | Observed         | Mr(expt)         | Mr(calc)         | Delta          | Miss     | Sequence                                  |
|------------------|------------------|------------------|------------------|----------------|----------|-------------------------------------------|
| <b>1 - 16</b>    | <b>1960.8439</b> | <b>1959.8366</b> | <b>1959.8918</b> | <b>-0.0551</b> | <b>0</b> | <b>-.MDTLVEDDICILNHEK.A</b> Oxidation (M) |
| <b>1 - 19</b>    | <b>2309.0833</b> | <b>2308.0760</b> | <b>2308.0940</b> | <b>-0.0180</b> | <b>1</b> | <b>-.MDTLVEDDICILNHEKAHR.R</b>            |
| <b>73 - 87</b>   | <b>1546.7980</b> | <b>1545.7907</b> | <b>1545.7747</b> | <b>0.0160</b>  | <b>1</b> | <b>R.LVGARADEETSSVGR.E</b>                |
| <b>124 - 132</b> | <b>1106.4907</b> | <b>1105.4834</b> | <b>1105.5437</b> | <b>-0.0603</b> | <b>0</b> | <b>K.MLNEQLQSK.E</b> Oxidation (M)        |
| <b>194 - 208</b> | <b>1665.7782</b> | <b>1664.7709</b> | <b>1664.8594</b> | <b>-0.0885</b> | <b>1</b> | <b>K.ARQTGPPQEDILQGR.D</b>                |
| <b>196 - 217</b> | <b>2462.2026</b> | <b>2461.1953</b> | <b>2461.3037</b> | <b>-0.1084</b> | <b>1</b> | <b>R.QTGPPQEDILQGRDVIRPSSLR.E</b>         |
| <b>322 - 337</b> | <b>1894.8136</b> | <b>1893.8063</b> | <b>1893.9221</b> | <b>-0.1158</b> | <b>1</b> | <b>K.VFSDKAVLQSWTDNER.L</b>               |
| <b>355 - 369</b> | <b>1716.7764</b> | <b>1715.7691</b> | <b>1715.8155</b> | <b>-0.0464</b> | <b>0</b> | <b>R.NSLEDNSWVFPSPPK.S</b>                |

No match to: 905.5685, 909.1025, 915.5192, 921.5958, 927.6274, 931.6047, 937.6160, 940.6747, 946.5799, 951.6473, 958.5972, 965.5654, 969.6224, 975.5670, 985.5731, 996.6290, 1000.5619, 1002.5694, 1029.5447, 1031.5398, 1037.5236, 1045.5701, 1052.6335, 1058.5339, 1072.0676, 1088.0281, 1089.5162, 1097.9795, 1104.0037, 1118.5121, 1127.4846, 1134.5118, 1141.4954, 1145.5497, 1151.5867, 1165.6465, 1179.5137, 1192.5044, 1200.5295, 1218.4714, 1232.9515, 1233.4534, 1245.4694, 1254.5023, 1265.5143, 1273.4655, 1276.9247, 1286.4921, 1292.8901, 1299.4949, 1307.4885, 1320.4276, 1330.4550, 1339.5416, 1354.4745, 1365.4519, 1383.4897, 1436.7856, 1443.7440, 1451.7626, 1460.7914, 1467.8162, 1475.8049, 1489.8815, 1507.8650, 1523.8110, 1531.8479, 1549.8390, 1555.8281, 1562.8237, 1571.7974, 1577.8153, 1587.7538, 1595.7953, 1604.8348, 1626.8129, 1639.8247, 1660.8040, 1679.8074, 1699.7394, 1707.7084, 1724.7858, 1765.6505, 1791.6285, 1807.7592, 1822.7374, 1838.8208, 1880.8030, 1910.7770, 1923.8010, 1940.8031, 2007.8514, 2050.8972, 2149.9780, 2193.9604, 2235.0896, 2249.0273, 2268.0583, 2298.1189, 2327.1343, 2340.1387, 2383.9480, 2399.0703, 2421.2078, 2434.1934, 2446.2012, 2448.1616, 2457.0439, 2487.1924, 2503.2190, 2637.3521, 2705.3567

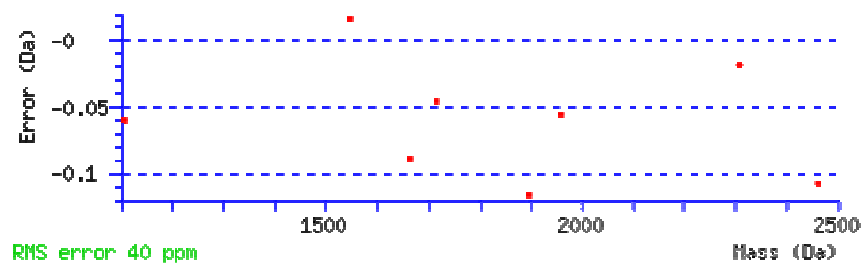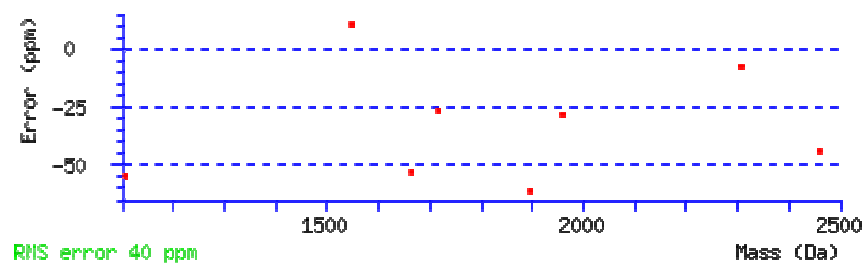

### 62 Cytosolic 5'-nucleotidase 3

Number of mass values searched: **150**

Number of mass values matched: **11**

Sequence Coverage: **46%**

Matched peptides shown in **Bold Red**

**1 MDRAAVARVG AVASASVCAV VAGVVLAQYI FTLKRKTGRK TKIEMMPEF**  
**51 QKSSVRIKNP TRVEEIIICGL IKGGAALKQI ITDFDMLSR FSYNGKRCPT**  
**101 CHNIIDNCKL VTDECRRKLL QLKEQYYAIE VDPVLTVEEK FPYMVEWYTK**  
**151 SHGLLIEQGI PKAKLKEIVA DSDVMLKEGY ENFFGK LQQH GIPVFIFSAG**  
**201 IGDVLEEVI R QAGVYHSNVK VVS NFMDFDE NGVLKGFKE LIHVF NKHGD**  
**251 ALKNTDYFSQ LKDNSNIILL GDSQGDLRMA DGVANVEHIL KIGYLNDRVD**  
**301 ELLEKYMDSY DIVLVKEESL EVVNSILQKT L**

Start - End Observed Mr(expt) Mr(calc) Delta Miss Sequence

**1 - 8 905.3221 904.3148 904.4549 -0.1400 1 -.MDRAAVAR.V Oxidation (M)**  
**9 - 34 2593.3169 2592.3096 2592.4350 -0.1253 0 R.VGAVASASVCAVVAGVVLAQYIFTLK.R**  
**63 - 72 1173.4960 1172.4887 1172.6475 -0.1588 0 R.VEEIIICGLIK.G**  
**78 - 96 2265.0718 2264.0645 2264.1147 -0.0502 1 K.LQIITDFDMLSRFSYNGK.R Oxidation (M)**  
**98 - 109 1531.8385 1530.8312 1530.6378 0.1935 0 R.CPTCHNIIDNCK.L**  
**141 - 150 1379.5863 1378.5790 1378.6268 -0.0477 0 K.FPYMVEWYTK.S Oxidation (M)**  
**141 - 162 2652.3601 2651.3528 2651.3458 0.0071 1 K.FPYMVEWYTKSHGLLIEQGIPK.A Oxidation (M)**  
**187 - 210 2637.3420 2636.3347 2636.4326 -0.0979 0 K.LQQHGIPVFIFSAGIGDVLEEVI R.Q**  
**211 - 220 1102.5175 1101.5102 1101.5567 -0.0465 0 R.QAGVYHSNVK.V**  
**306 - 316 1361.5873 1360.5800 1360.6584 -0.0784 0 K.YMDSYDIVLVK.E Oxidation (M)**  
**317 - 329 1487.8701 1486.8628 1486.7879 0.0750 0 K.EESLEVVNSILQK.T**

No match to: 910.6569, 914.6152, 921.3055, 926.6487, 931.6012, 937.6183, 941.6133, 947.6183, 949.6013, 951.6110, 958.6157, 965.6014, 971.6024, 977.6060, 985.5652, 1000.5585, 1002.5733, 1014.5770, 1023.5338, 1028.5618, 1029.5317, 1031.5350, 1040.5641, 1044.0803, 1045.5541, 1052.6189, 1058.5233, 1066.0505, 1068.4962, 1074.5104, 1082.0181, 1084.4634, 1089.5032, 1099.5684, 1106.4373, 1118.5054, 1124.6328, 1130.5234, 1136.5962, 1143.5432, 1145.5492, 1153.5892, 1156.4626, 1165.5660, 1183.5497, 1189.4800, 1191.4746, 1200.5592, 1211.5387, 1217.4608, 1218.4336, 1228.5278, 1233.4402, 1240.5394, 1242.5477, 1252.4435, 1263.4727, 1270.9048, 1278.5884, 1296.5659, 1308.4772, 1318.5958, 1326.4785, 1337.5385, 1339.5377, 1354.1279, 1368.5187, 1375.5876, 1393.6302, 1401.6970, 1410.6907, 1418.7887, 1427.6935, 1434.7721, 1436.7792, 1443.7762, 1458.8014, 1462.8335, 1464.8300, 1472.7897, 1481.8629, 1489.8849, 1496.8627, 1504.8650, 1507.8541, 1516.8601, 1523.8676, 1529.8477, 1541.2827, 1548.7563, 1549.8314, 1555.8164, 1562.8278, 1571.7764, 1578.8318, 1587.7443, 1593.7600, 1604.8413, 1613.7449, 1630.8374, 1634.8781, 1649.8413, 1660.8263, 1675.8431, 1678.8407, 1686.9164, 1697.9585, 1704.8074, 1714.7539, 1722.8053, 1742.7396, 1759.7506, 1791.6226, 1822.0074, 1960.8090, 2300.0583, 2309.0386, 2318.0950, 2336.1047, 2368.1030, 2394.1345, 2404.1567, 2419.1870, 2421.1987, 2431.1626, 2434.1794, 2446.1924, 2448.1824, 2457.2708, 2462.1990, 2474.0125, 2487.1855, 2503.1846, 2525.1797, 2541.1687, 2564.2595, 2567.2939, 2609.3357, 2619.3313

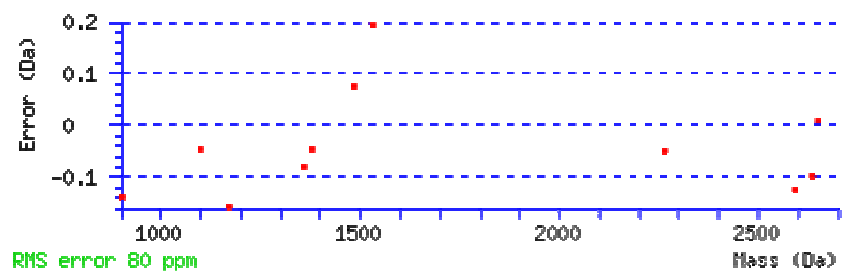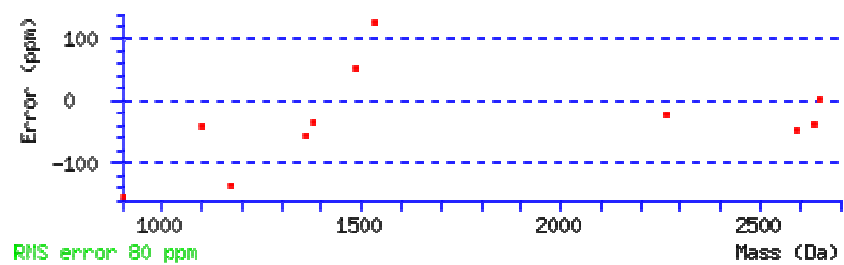

**63 Ankyrin repeat domain-containing protein 16**

Number of mass values searched: **100**

Number of mass values matched: **8**

Sequence Coverage: **28%**

Matched peptides shown in **Bold Red**

**1 MALPGDPRRL** CRLVQEGRLR **DLQEELAVAR** GCRGPAGDTL LHCAARHGRQ  
**51 DILAYLVEAW** SMDIEATNRD YKRPLHEAAS MGHR**DCVRYL LGR**GAVVDSL  
**101 KKADWTPLMM** ACTRKNLDVI QDLVEHGANP LLK**NKDGWNS FHIASREGHP**  
**151 VILR**YLLTVC PDAWKTESNI RRTPLHTAAM HGCLEAVQVL LERCHYEPDC  
**201 RDNCGVTPFM DAIQCGHVS**I AKLLLEQHKC CSSAADSMGA QALHRAAVTG  
**251 QDEAIR**FLVC GLGIDVDVRA KSSQLTALHY AAKE**EGQNTV QTLLSLGADI**  
**301 NSTDER**NRSV LHLACAGQHV ACTRLLQSG LKDS EDTGT LAQQLTRSVD  
**351 ILQDFD**HVK S

| Start - End      | Observed         | Mr(expt)         | Mr(calc)         | Delta          | Miss     | Sequence                                       |
|------------------|------------------|------------------|------------------|----------------|----------|------------------------------------------------|
| <b>1 - 9</b>     | <b>1028.5734</b> | <b>1027.5661</b> | <b>1027.5233</b> | <b>0.0428</b>  | <b>1</b> | <b>-.MALPGDPRR.L</b> Oxidation (M)             |
| <b>21 - 30</b>   | <b>1143.5366</b> | <b>1142.5293</b> | <b>1142.5931</b> | <b>-0.0638</b> | <b>0</b> | <b>R.DLQEELAVAR.G</b>                          |
| <b>85 - 93</b>   | <b>1151.6040</b> | <b>1150.5967</b> | <b>1150.5917</b> | <b>0.0050</b>  | <b>1</b> | <b>R.DCVRYLLGR.G</b>                           |
| <b>134 - 146</b> | <b>1531.8419</b> | <b>1530.8346</b> | <b>1530.7328</b> | <b>0.1019</b>  | <b>1</b> | <b>K.NKDGWNSFHIASR.E</b>                       |
| <b>147 - 154</b> | <b>920.6356</b>  | <b>919.6283</b>  | <b>919.5239</b>  | <b>0.1044</b>  | <b>0</b> | <b>R.EGHPVILR.Y</b>                            |
| <b>202 - 222</b> | <b>2336.1223</b> | <b>2335.1150</b> | <b>2335.0396</b> | <b>0.0755</b>  | <b>0</b> | <b>R.DNCGVTPFMDAIQCGHVSIAK.L</b> Oxidation (M) |
| <b>246 - 256</b> | <b>1130.5251</b> | <b>1129.5178</b> | <b>1129.5727</b> | <b>-0.0549</b> | <b>0</b> | <b>R.AAVTGQDEAIR.F</b>                         |
| <b>284 - 306</b> | <b>2462.2209</b> | <b>2461.2136</b> | <b>2461.1932</b> | <b>0.0204</b>  | <b>0</b> | <b>K.EGQNTVQTLLSLGADINSTDER.N</b>              |

No match to: 911.6223, 914.6027, 927.6432, 931.5934, 937.6636, 940.6704, 946.6240, 949.6241, 951.6068, 957.6459, 963.6786, 972.6182, 979.6112, 985.5679, 1000.5555, 1002.5706, 1029.5400, 1031.5341, 1044.0980, 1054.1857, 1058.5243, 1066.0598, 1068.4938, 1074.5115, 1082.0245, 1084.4581, 1089.5046, 1100.5228, 1106.4253, 1113.5217, 1118.5028, 1145.5676, 1161.5538, 1174.4911, 1183.5504, 1189.4716, 1191.4727, 1199.5543, 1211.5293, 1218.4331, 1233.4454, 1242.5487, 1252.4446, 1270.9248, 1286.8950, 1321.5922, 1326.4918, 1339.5453, 1346.5165, 1354.0055, 1410.6913, 1436.7808, 1464.8275, 1476.1320, 1487.8744, 1489.8868, 1507.8590, 1541.3051, 1549.8403, 1556.8319, 1571.7910, 1578.8484, 1587.7592, 1604.8480, 1630.8473, 1649.8582, 1660.8396, 1678.8617, 1687.0063, 1704.8337, 1714.7697, 1722.8170, 1960.8308, 2318.1125, 2368.1257, 2394.1563, 2419.2085, 2421.2229, 2434.2156, 2446.2119, 2448.2080, 2457.6631, 2474.0449, 2487.1917, 2503.2051, 2525.1968, 2540.1013, 2562.2842, 2593.3416, 2609.3730, 2636.3589, 2652.3804

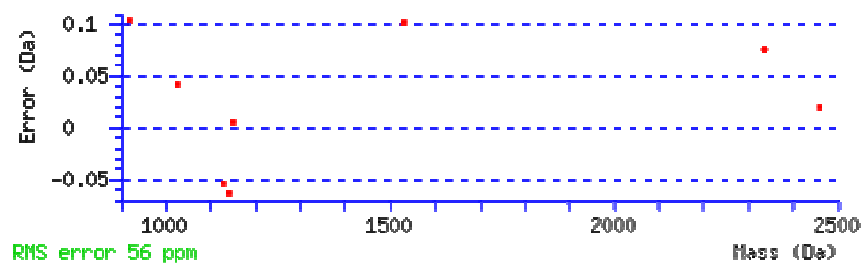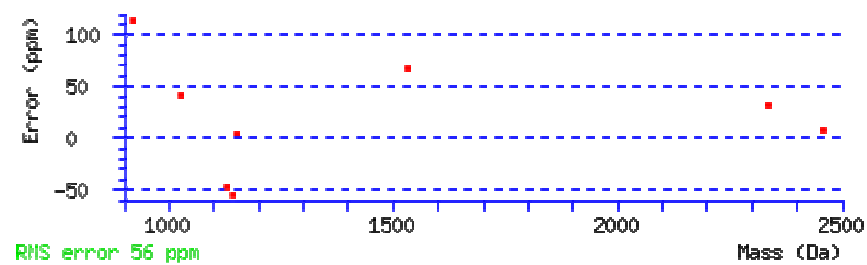

Supplement: c2ib20053h.pdf [file c2ib20053h.pdf]
